# Supplementary material
Source: PubMed Central journal article supplement (PMC7442739)

## Supporting Information

### Cobalt-Catalyzed Selective Unsymmetrical Dioxidation of *gem*-Difluoroalkenes

Douglas L. Orsi,<sup>†</sup> Justin T. Douglas,<sup>@</sup> Jacob P. Sorrentino,<sup>§</sup> Ryan A. Altman<sup>%,\*</sup>

<sup>†</sup>Vanderbilt Center for Neuroscience Drug Discovery, Vanderbilt University, Nashville, TN  
37232

<sup>@</sup>The University of Kansas, Molecular Structures Group, Nuclear Magnetic Resonance  
Laboratory, Lawrence, KS 66045

<sup>§</sup>The University of Kansas, Department of Medicinal Chemistry, Lawrence, KS 66045

<sup>%</sup>Department of Medicinal Chemistry and Molecular Pharmacology and Department of  
Chemistry, Purdue University, West Lafayette, IN 47907

\*Corresponding Author Email: raaltman@purdue.edu

#### Table of Contents

|                                                                                                           |     |
|-----------------------------------------------------------------------------------------------------------|-----|
| General Procedure for the Selective Unsymmetric<br>Dioxygenation of Difluoroalkenes with Phenols (B)..... | S2  |
| Optimization of Reaction Conditions .....                                                                 | S3  |
| Experimental Procedures for Mechanistic Experiments.....                                                  | S6  |
| NMR Spectra of Compound 3 .....                                                                           | S15 |
| NMR Spectra of Compounds in Table 2.....                                                                  | S17 |
| NMR Spectra of Compounds in Table 3.....                                                                  | S45 |
| NMR Spectra of Compounds in Table 4.....                                                                  | S55 |

### **General Procedure for the Selective Unsymmetric Dioxygenation of Difluoroalkenes with Phenols (B):**

An oven-dried 20 mL scintillation vial, equipped with a magnetic stirbar, was charged with difluoroalkene (0.50 mmol), phenol (1.50 mmol), and Co(acac)<sub>2</sub> (0.050–0.20 mmol). The system was purged with O<sub>2</sub> gas for 1 min before anhydrous DCB (2.0 mL) was added to the system under a stream of O<sub>2</sub> gas. The system was sealed with a PTFE-lined screw-top cap and stirred for 1 min at R.T. Subsequently, the vial was placed into a pre-heated reaction block and stirred vigorously at 90–140 °C for 24–48 h. The vial was cooled to R.T., and 50 μL of TFT was added *via* microsyringe. The solution was diluted with approximately 1 mL of DCM and then stirred at R.T. for 10 min to allow adequate mixing. After mixing, an aliquot was removed from the vial and passed through a pad of silica gel into an NMR tube using acetone as eluent to remove Co(acac)<sub>2</sub>, after which the reaction was analyzed by <sup>19</sup>F NMR for completion and selectivity. After <sup>19</sup>F NMR analysis, the aliquot was sampled for TLC analysis (visualized with 10% phosphomolybdic acid in EtOH) then returned to the vial. Aqueous base (sat. NaOH or Na<sub>2</sub>CO<sub>3</sub>) was added to the solution and stirred for 30 min, and then extracted with DCM (four times). The combined organic layers were washed with brine, dried over Na<sub>2</sub>SO<sub>4</sub>, concentrated *in vacuo*, and then purified by flash chromatography using EtOAc and hexanes.

## Optimization of Reaction Conditions:

**Table S1: Reactions with Oxidants:**

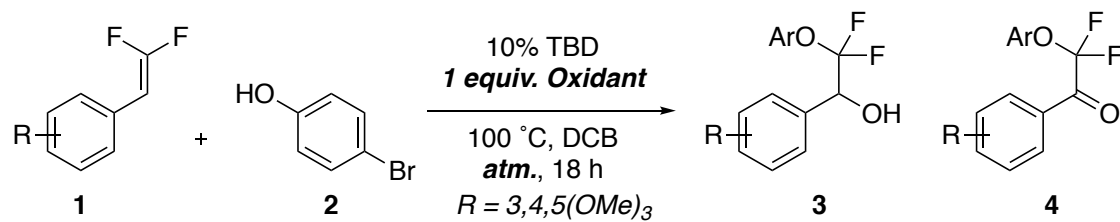

| Oxidant                                      | Atmosphere     | 1     | 3     | 4     |
|----------------------------------------------|----------------|-------|-------|-------|
| MnO <sub>2</sub>                             | O <sub>2</sub> | 0     | 0     | 0     |
| K <sub>2</sub> S <sub>2</sub> O <sub>8</sub> | O <sub>2</sub> | 15    | 23    | 15    |
| KMnO <sub>4</sub>                            | O <sub>2</sub> | 38    | 13    | 9     |
| Oxone                                        | O <sub>2</sub> | 48    | 5     | 1     |
| DMP                                          | O <sub>2</sub> | 16    | 14    | 9     |
| NMO                                          | O <sub>2</sub> | 53    | 3     | 7     |
| IBX                                          | O <sub>2</sub> | 27    | 35    | 15    |
| K <sub>2</sub> S <sub>2</sub> O <sub>8</sub> | air            | 21    | 8     | 0     |
| KMnO <sub>4</sub>                            | air            | 46    | 0     | 0     |
| mCPBA                                        | air            | 23    | 0     | 0     |
| IBX                                          | air            | 61    | 0     | 0     |
| H <sub>2</sub> O <sub>2</sub> (30 %)         | air            | 40    | 11    | 6     |
| <sup>t</sup> BuOOH                           | air            | 34    | 0     | 0     |
| Iodopentoxide                                | air            | trace | trace | trace |
| Cumene Hydroperoxide                         | air            | 28    | 3     | 1     |
| ( <sup>t</sup> BuO) <sub>2</sub>             | air            | 40    | trace | 1.5   |
| H <sub>2</sub> O <sub>2</sub> -Urea          | air            | 39    | 6     | 6     |
| Oxone                                        | air            | 37    | 0     | 0     |
| DMP*                                         | air            | 36    | 0     | 0     |
| NMO                                          | air            | 67    | 0     | 0     |

\* = Reacted on addition at room temperature

Following General Procedure B, 0.023 g (0.10 mmol) of compound **1** was reacted with 0.052 g (0.30 mmol) of 4-bromophenol in the presence of 0.0014 g (0.010 mmol) of TBD, and 0.10 mmol of oxidant in 0.40 mL of DCB at 100 °C for 18 h. Reactions were analyzed by <sup>19</sup>F NMR with a 0.010 mL (0.080 mmol) TFT standard.

**Table S2: Reactions with Oxidizing Metals:**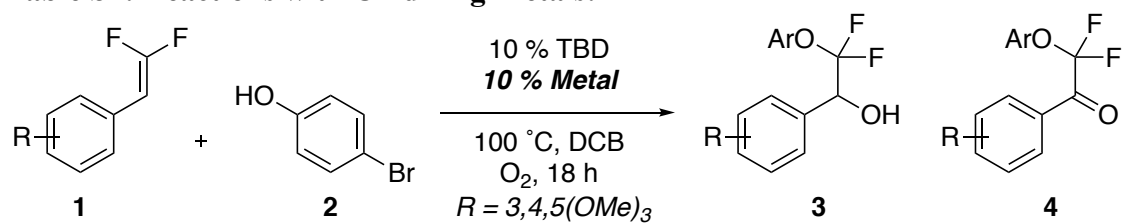

| Metal                               | <b>1</b> | <b>3</b> | <b>4</b> |
|-------------------------------------|----------|----------|----------|
| Pd(OAc) <sub>2</sub>                | 5        | 38       | 26       |
| Pd <sub>2</sub> (dba) <sub>3</sub>  | 5        | 47       | 17       |
| FeCl <sub>3</sub>                   | 4        | 38       | 23       |
| Fe(OAc) <sub>2</sub>                | 5        | 41       | 35       |
| CuCl                                | 4        | 24       | 23       |
| Cu(OAc) <sub>2</sub>                | 0        | 30       | 33       |
| AuCl <sub>3</sub>                   | 0        | 0        | 0        |
| Ag <sub>2</sub> CO <sub>3</sub>     | 10       | 43       | 24       |
| AgNO <sub>3</sub>                   | 5        | 32       | 27       |
| [Ir(cod)Cl] <sub>2</sub>            | 26       | 30       | 22       |
| RhCl <sub>3</sub> ·H <sub>2</sub> O | 6        | 46       | 29       |
| Co(acac) <sub>2</sub>               | 6        | 74       | 13       |

Following General Procedure B, 0.023 g (0.10 mmol) of compound **1** was reacted with 0.052 g (0.30 mmol) of 4-bromophenol in the presence of 0.0014 g (0.010 mmol) of TBD, and 0.010 mmol of metal in 0.40 mL of DCB at 100 °C for 18 h. Reactions were analyzed by <sup>19</sup>F NMR with a 0.01 mL (0.080 mmol) TFT standard.



**Table S3: Solvent Screening:**

Reaction scheme showing the conversion of compound **1** (a substituted styrene derivative) and compound **2** (4-bromophenol) to products **3** and **4** (fluorinated alcohols/ketones) using 10% Co(acac)<sub>2</sub> in a solvent at 100 °C for 18 h under O<sub>2</sub>. The substituent R is defined as 3,4,5-trimethoxyphenyl.

| Solvent          | <b>1</b> | <b>3</b> | <b>4</b> |
|------------------|----------|----------|----------|
| DCB              | 7        | 63       | 5        |
| H <sub>2</sub> O | 35       | 32       | 1        |
| IPA              | 64       | 7        | 0.5      |
| 1,4-Dioxane      | 61       | 5        | 0        |
| MeCN             | 45       | 20       | 2        |
| DMF              | 55       | 15       | 5        |
| PhMe             | 28       | 55       | 2        |
| DMSO             | 49       | 9        | 5        |

Following General Procedure B, 0.023 g (0.10 mmol) of compound **1** was reacted with 0.052 g (0.30 mmol) of 4-bromophenol in the presence of 0.003 g (0.010 mmol) of Co(acac)<sub>2</sub> in 0.40 mL of solvent at 100 °C for 18 h. Reactions were analyzed by <sup>19</sup>F NMR with a 0.010 mL (0.080 mmol) TFT standard.

## Experimental Procedures for Mechanistic Experiments:

**Table S4: Radical Trap Experiments:**

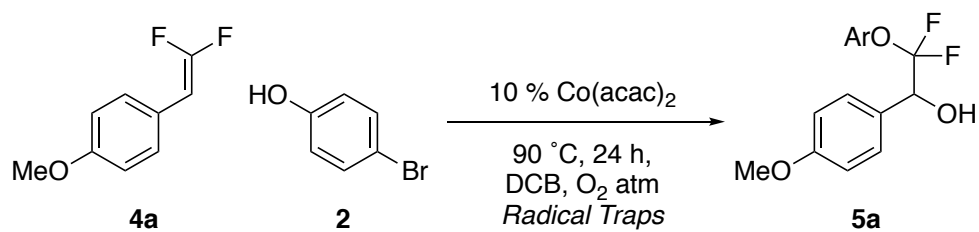

| <i>Radical Trap</i> | <i>Conv.</i> | <i>Pdt</i> | <i>Ketone</i> |
|---------------------|--------------|------------|---------------|
|                     | 68%          | 0%         | 0%            |
|                     | 100%         | 0%         | 0%            |
|                     | 92%          | 54%        | 5.5%          |

### **Reaction with Butylated Hydroxy-Toluene (BHT):**

Following General Procedure B, 0.085 g (0.50 mmol) of compound **4a** was reacted with 0.260 g (1.50 mmol) of 4-bromophenol in the presence of 0.331 g (1.50 mmol) of BHT and 0.013 g (0.050 mmol) of Co(acac)<sub>2</sub> at 110 °C for 15 h. The reaction was cooled to R.T., and 0.050 mL (0.40 mmol) of TFT was added. The resulting mixture was diluted with DCM and filtered through silica gel with acetone. The reaction yield and selectivity were determined by <sup>19</sup>F NMR analysis of the crude reaction mixture, and non-fluorinated adducts were observed through GC-MS analysis.

### **Reaction with 1,4-Benzoquinone:**

Following General Procedure B, 0.085 g (0.50 mmol) of compound **4a** was reacted with 0.260 g (1.50 mmol) of 4-bromophenol in the presence of 0.162 g (1.50 mmol) of 1,4-benzoquinone and 0.013 g (0.050 mmol) of Co(acac)<sub>2</sub> at 110 °C for 15 h. The reaction was cooled to R.T., and 0.050 mL (0.40 mmol) of TFT was added. The resulting mixture was diluted with DCM and filtered through silica gel with acetone. The reaction yield and selectivity were determined by <sup>19</sup>F NMR analysis of the crude reaction mixture, and non-fluorinated adducts were observed through GC-MS analysis.

### **Reaction with 1,4-Dinitrobenzene:**

Following General Procedure B, 0.085 g (0.50 mmol) of compound **4a** was reacted with 0.260 g (1.50 mmol) of 4-bromophenol in the presence of 0.252 g (1.50 mmol) of 1,4-dinitrobenzene and 0.013 g (0.050 mmol) of Co(acac)<sub>2</sub> at 110 °C for 15 h. The reaction was cooled to R.T., and 0.050 mL (0.40 mmol) of TFT was added. The resulting mixture was diluted with DCM and filtered through silica gel with acetone. The reaction yield and selectivity were determined by <sup>19</sup>F NMR analysis of the crude reaction mixture, and non-fluorinated adducts were observed through GC-MS analysis.

## EPR Experiments:

Electron Paramagnetic Resonance (EPR), also known as Electron Spin Resonance (ESR) spectroscopy was used to probe the proposed reaction mechanism. EPR is a magnetic resonance spectroscopy sensitive to the oxidation state and molecular structure of molecules with unpaired electrons, such as transition metal complexes and stable radicals.<sup>2</sup> The proposed mechanism involves paramagnetic cobalt, reactive oxygen species, and organic radicals; thus, EPR was used to validate the role of these species in the general reaction.

### Figure S1: EPR Experiments at 7 K to Analyze the Electronic Character of the Co:

EPR at 7 K revealed that Co does not interact with the difluoroalkene (A vs. B). The Co catalyst coordinates with phenol (A vs. C) in a similar fashion to a known (EtOH)<sub>2</sub>Co(acac)<sub>2</sub> complex (E). However, the interaction with phenol does not involve a redox event, as the Co remains Co(II). The presumed (PhOH)<sub>2</sub>Co(acac)<sub>2</sub> does not react with the difluoroalkene in the absence of O<sub>2</sub> (C vs. D). Upon addition of O<sub>2</sub>, Co(II) (Left Frame) rapidly oxidizes to Co(III) (Right Frame), at which point the metal is no longer paramagnetic and EPR spectra cannot be obtained.

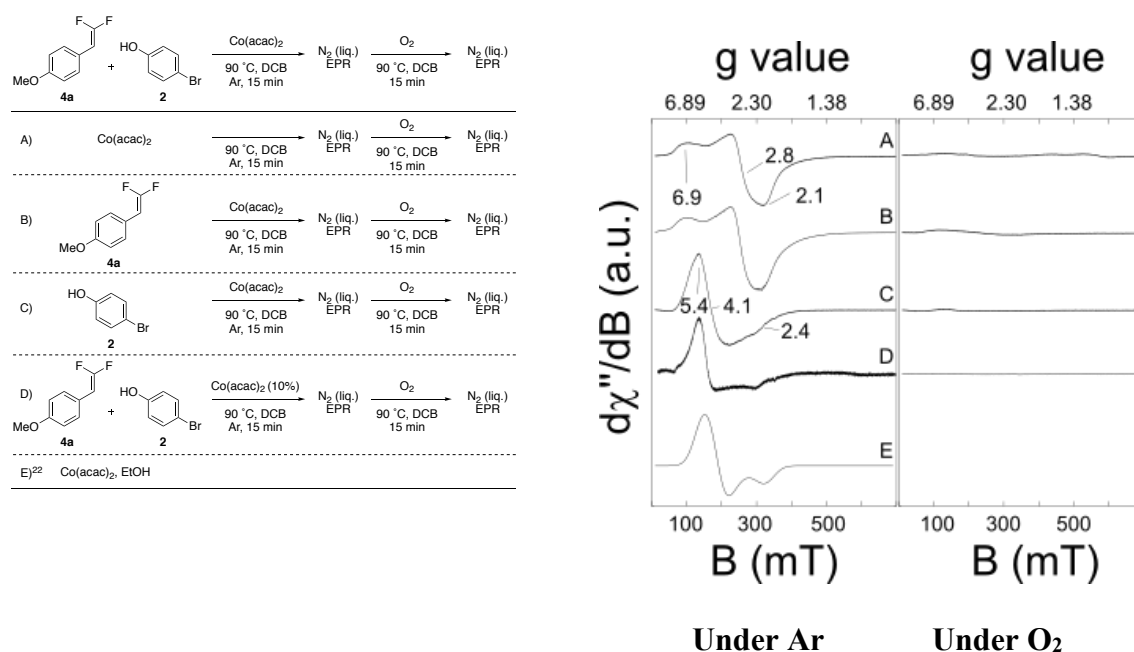

#### A) Reacting Co(acac)<sub>2</sub> and O<sub>2</sub>:

Co(acac)<sub>2</sub> (0.021 g, 0.082 mmol) was added to an oven dried one dram vial. The vial was sealed with a screw-top cap containing a PTFE-lined silicon septum, and the reaction was evacuated and backfilled three times with N<sub>2</sub>. DCB (1.0 mL) was added, and a 100 μL aliquot of the reaction mixture was transferred to an EPR tube, frozen in liquid N<sub>2</sub>, and then subjected to EPR analysis at 7 K. The reaction was then put under an O<sub>2</sub> balloon, and stirred at 90 °C for 30 min. A 100 μL aliquot of the reaction mixture was transferred into an EPR tube, frozen in liquid N<sub>2</sub>, and then subjected to EPR analysis at 7 K.

### B) Reacting Co(acac)<sub>2</sub> and 4a under O<sub>2</sub>:

Following General Procedure B, in an oven-dried one dram vial compound **4a** (0.043 g, 0.25 mmol) was reacted with Co(acac)<sub>2</sub> (0.064 g, 0.25 mmol) in DCB (1.0 mL). An O<sub>2</sub> balloon was added, and a 100 μL aliquot of the reaction mixture was transferred to an EPR tube, frozen in liquid N<sub>2</sub>, and then subjected to EPR analysis at 7 K. The reaction was then put under an O<sub>2</sub> balloon, and stirred at 90 °C for 30 min. A 100 μL aliquot of the reaction mixture was transferred into an EPR tube, frozen in liquid N<sub>2</sub>, and then subjected to EPR analysis at 7 K.

### C) Reacting Co(acac)<sub>2</sub> and 4-bromophenol under O<sub>2</sub>:

Following General Procedure B, in an oven-dried one dram vial of 4-bromophenol (0.13 g, 0.75 mmol) was reacted with Co(acac)<sub>2</sub> (0.064 g, 0.25 mmol) in DCB (1.0 mL). An O<sub>2</sub> balloon was added, and a 100 μL aliquot of the reaction mixture was transferred to an EPR tube, frozen in liquid N<sub>2</sub>, and then subjected to EPR analysis at 7 K. The reaction was then put under an O<sub>2</sub> balloon, and stirred at 90 °C for 30 min. A 100 μL aliquot of the reaction mixture was transferred into an EPR tube, frozen in liquid N<sub>2</sub>, and then subjected to EPR analysis at 7 K.

### D) Following Full Reaction Course:

Following General Procedure B, in an oven-dried one dram vial of compound **4a** (0.043 g, 0.25 mmol) was reacted with 4-bromophenol (0.13 g, 0.75 mmol) in the presence of Co(acac)<sub>2</sub> (0.006 g, 0.03 mmol) in DCB (1.0 mL). An O<sub>2</sub> balloon was added, and a 100 μL aliquot of the reaction mixture was transferred to an EPR tube, frozen in liquid N<sub>2</sub>, and then subjected to EPR analysis at 7 K. The reaction was then put under an O<sub>2</sub> balloon, and stirred at 90 °C for 30 min. A 100 μL aliquot of the reaction mixture was transferred into an EPR tube, frozen in liquid N<sub>2</sub>, and then subjected to EPR analysis at 7 K.

**EPR Parameters:** Full Reaction Course and Co(acac)<sub>2</sub> with Phenol under Ar:

| Spectrum ID | g-values      | Line Width | Experiments                                                                                |
|-------------|---------------|------------|--------------------------------------------------------------------------------------------|
| A           | 7, 2.5, 2.5   | 75         | Co(II) and Ar<br>Co(II) and <b>4a</b> and Ar                                               |
| B           | 5, 3, 2       | 150        | Co(II) and O <sub>2</sub><br>Co(II) and <b>4a</b> and O <sub>2</sub>                       |
| C           | 5.8, 3.8, 2.5 | 50         | Co(II), <b>2</b> , and Ar<br>Co(II), <b>2</b> , <b>4a</b> , and Ar                         |
| D           | 4.5, 2        | 75         | Co(II), <b>2</b> , and O <sub>2</sub><br>Co(II), <b>2</b> , <b>4a</b> , and O <sub>2</sub> |

| Table S6: Summary of EPR Parameters for Full Dipolar Zero-Field-Splitting Hamiltonian |              |              |
|---------------------------------------------------------------------------------------|--------------|--------------|
|                                                                                       | Spectrum A/B | Spectrum C/D |
| S                                                                                     | 3/2          | 3/2          |
| G                                                                                     | 2.2          | 2.2          |
| Nucleus                                                                               | Co           | Co           |
| A (MHz)                                                                               | 0            | 0            |
| Line Width                                                                            | 100          | 100          |
| D (MHz)                                                                               | 500,000      | 500,000      |
| E (MHz)                                                                               | 166,667      | 0            |

**Figure S2: EPR Spin Trapping of Phenol Radical with BMPO:**

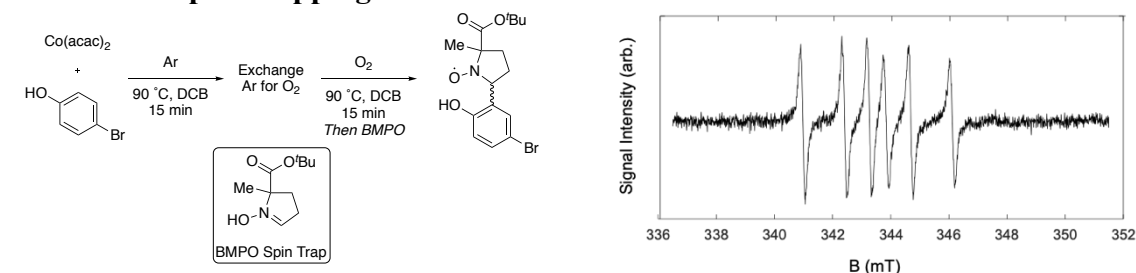

### EPR Spin Trapping with BMPO or DMPO:

To elucidate the presence and source of reactive oxygen species and organic radicals, EPR Spin Trapping analysis with the nitron spin traps BMPO and DMPO was performed (Figure S2). To determine the source of the reactive oxygen species and/or organic radicals, each potential reaction pathway was investigated in a string of half reactions, involving spin trapping reagents and EPR analysis (Figure S3). From these experiments, organic radicals and reactive oxygen species were only trapped in the presence of Co, phenol, and  $\text{O}_2$ , consistent with our proposed mechanism in which Co activates  $\text{O}_2$  to generate a reactive oxygen species that abstracts a hydrogen radical from phenol to generate a reactive organic radical. In all other conditions, no signal above baseline noise was observed, with the exception of difluoroalkene and Co in the presence of Ar. However, this signal likely results from the known background reaction between N–O species and difluoroalkenes and not along the Co-catalyzed reaction pathway.

**Figure S3: EPR Spin Trapping with BMPO or DMPO:**

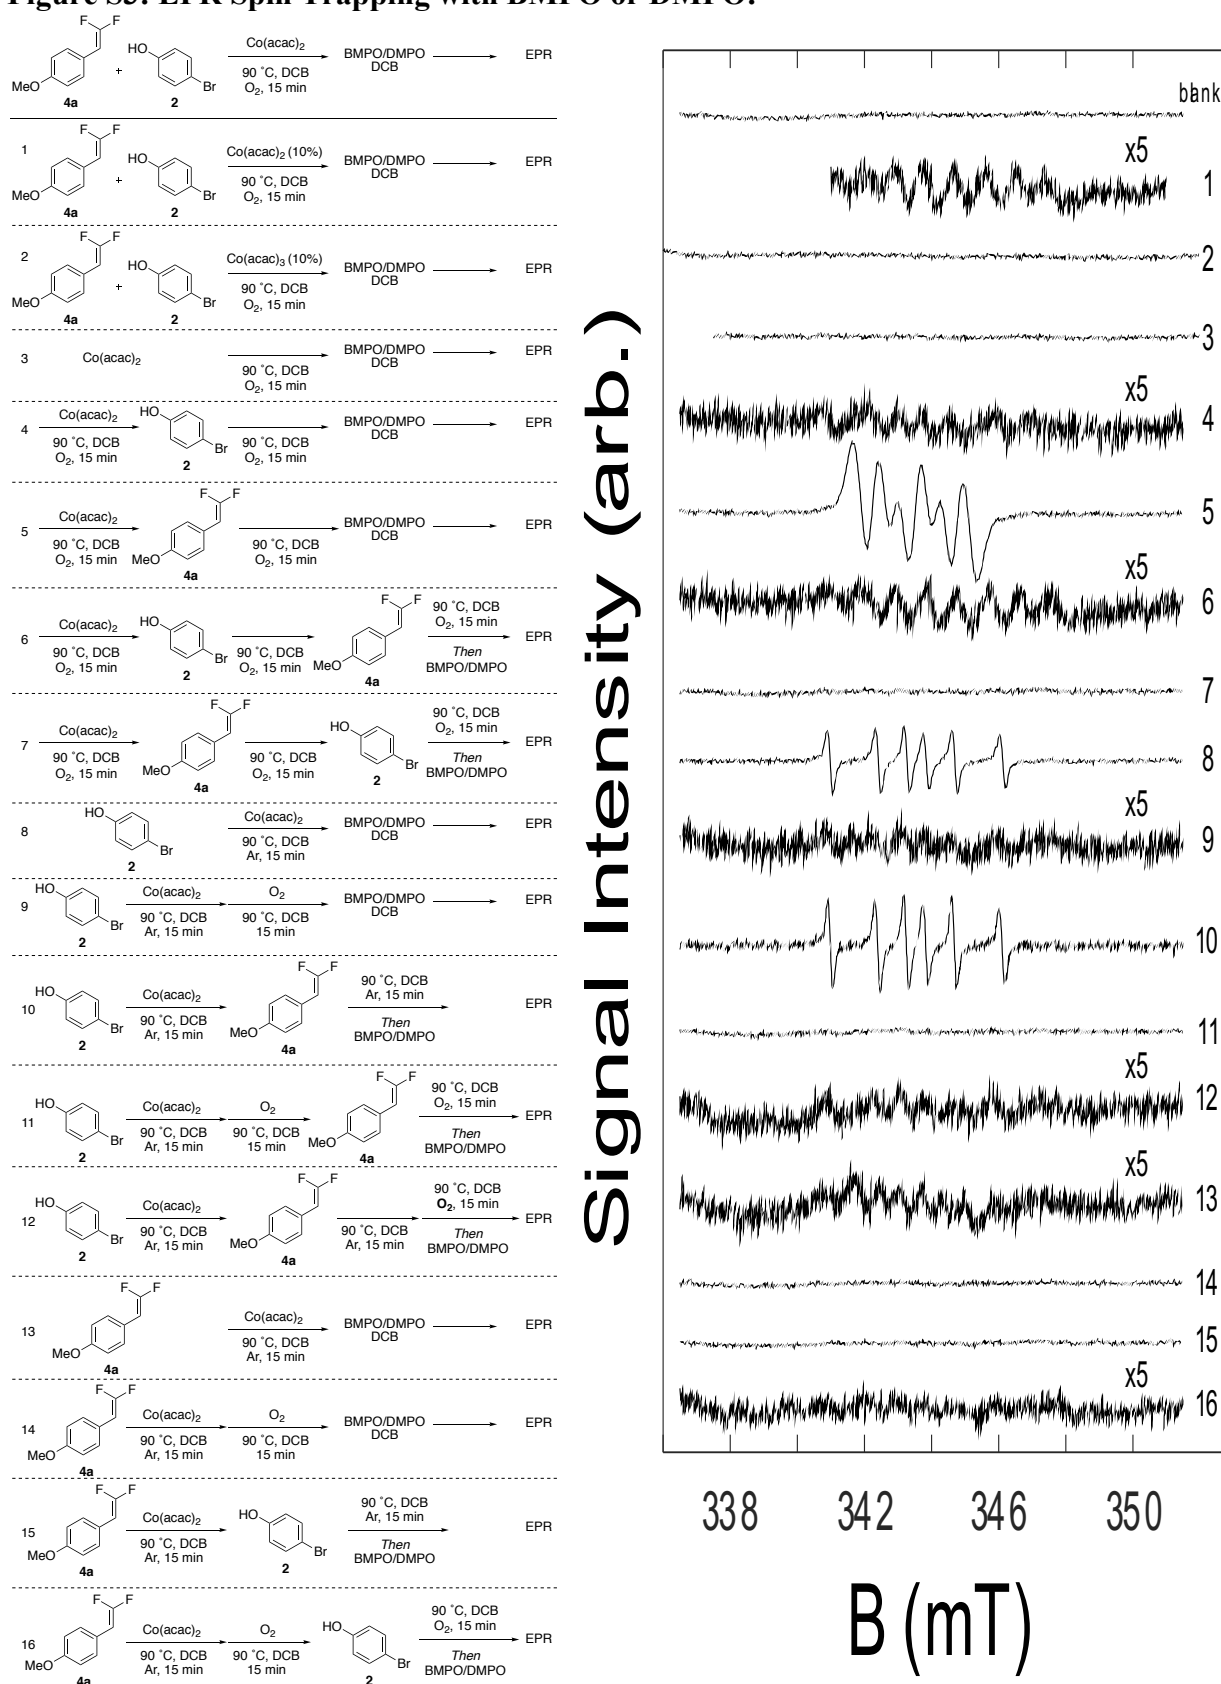

**Pathway A (spectrum 1):** Following General Procedure A, in an oven-dried one dram vial of compound **4a** (0.017 g, 0.10 mmol) was reacted with 4-bromophenol (0.052 g, 0.30 mmol) in the presence of Co(acac)<sub>2</sub> (0.0026 g, 0.010 mmol) in DCB (0.40 mL). An O<sub>2</sub> balloon was added, and the reaction was stirred at 90 °C for 15 min. A 100 μL aliquot of the reaction mixture was transferred into an Eppendorf tube containing 10 μL of a 20 mg/200 μL DCB sample of BMPO or DMPO, mixed on a Vortex mixer, and then a capillary tube sample removed for EPR analysis at R.T. (Figure S3-1, Spectrum 1).

**Pathway A-2 (spectrum 2):** Following General Procedure A, in an oven-dried one dram vial of compound **4a** (0.017 g, 0.10 mmol) was reacted with 4-bromophenol (0.052 g, 0.30 mmol) in the presence of Co(acac)<sub>3</sub> (0.0038 g, 0.010 mmol) in DCB (0.40 mL). An O<sub>2</sub> balloon was added, and the reaction was stirred at 90 °C for 15 min. A 100 μL aliquot of the reaction mixture was transferred into an Eppendorf tube containing 10 μL of a 20 mg/200 μL DCB sample of BMPO or DMPO, mixed on a Vortex mixer, and then a capillary tube sample removed for EPR analysis at R.T. (Figure S3-1, Spectrum 2).

**Pathway B (spectra 3, 4, and 6):** Co(acac)<sub>2</sub> (0.026 g, 0.10 mmol) was added to an oven dried one dram vial. The vial was sealed with a screw-top cap containing a PTFE-lined silicon septum, and the reaction was evacuated and backfilled three times with N<sub>2</sub>. DCB (0.40 mL) was added, then put under an O<sub>2</sub> balloon and stirred at 90 °C for 15 min. A 100 μL aliquot of the reaction mixture was transferred into an Eppendorf tube containing 10 μL of a 20 mg/200 μL DCB sample of BMPO or DMPO, mixed on a Vortex mixer, and then a capillary tube sample removed for EPR analysis at R.T. (Figure S3-1, Spectrum 3). Then 4-bromophenol (0.052 g, 0.30 mmol) in 0.40 mL DCB was added, and the reaction stirred at 90 °C for 15 min. A 100 μL aliquot of the reaction mixture was transferred into an Eppendorf tube containing 10 μL of a 20 mg/200 μL DCB sample of BMPO or DMPO, mixed on a Vortex mixer, and then a capillary tube sample removed for EPR analysis at R.T. (Figure S3-1, Spectrum 4). Then **4a** (0.017 g, 0.10 mmol) in 0.40 mL DCB was added, and the reaction stirred at 90 °C for 15 min. A 100 μL aliquot of the reaction mixture was transferred into an Eppendorf tube containing 10 μL of a 20 mg/200 μL DCB sample of BMPO or DMPO, mixed on a Vortex mixer, and then a capillary tube sample removed for EPR analysis at R.T. (Figure S3-1, Spectrum 6).

**Pathway C (spectra 5 and 7):** Co(acac)<sub>2</sub> (0.026 g, 0.10 mmol) was added to an oven dried one dram vial. The vial was sealed with a screw-top cap containing a PTFE-lined silicon septum, and the reaction was evacuated and backfilled three times with N<sub>2</sub>. DCB (0.40 mL) was added, then put under an O<sub>2</sub> balloon and stirred at 90 °C for 15 min. Then **4a** (0.017 g, 0.10 mmol) in 0.40 mL DCB was added, and the reaction stirred at 90 °C for 15 min. A 100 μL aliquot of the reaction mixture was transferred into an Eppendorf tube containing 10 μL of a 20 mg/200 μL DCB sample of BMPO or DMPO, mixed on a Vortex mixer, and then a capillary tube sample removed for EPR analysis at R.T. (Figure S3-1, Spectrum 5). Then 4-bromophenol (0.052 g, 0.30 mmol) in 0.40 mL DCB was added, and the reaction stirred at 90 °C for 15 min. A 100 μL aliquot of the reaction mixture was transferred into an Eppendorf tube containing 10 μL of a 20 mg/200 μL DCB sample of BMPO or DMPO, mixed on a Vortex mixer, and then a capillary tube sample removed for EPR analysis at R.T. (Figure S3-1, Spectrum 7). *Note:* Spectrum 5 demonstrates the background reaction of N-O oxides or radicals with difluoroalkenes, as observed in <sup>19</sup>F NMR control reactions with BMPO or TEMPO in the absence of Co(acac)<sub>2</sub>.



**Pathway D (spectra 8, 9, and 11):** Co(acac)<sub>2</sub> (0.026 g, 0.10 mmol) and 4-bromophenol (0.052 g, 0.30 mmol) was added to an oven dried one dram vial. The vial was sealed with a screw-top cap containing a PTFE-lined silicon septum, and the reaction was evacuated and backfilled three times with N<sub>2</sub>. DCB (0.40 mL) was added, then put under an Ar balloon and stirred at 90 °C for 15 min. A 100 μL aliquot of the reaction mixture was transferred into an Eppendorf tube containing 10 μL of a 20 mg/200 μL DCB sample of BMPO or DMPO, mixed on a Vortex mixer, and then a capillary tube sample removed for EPR analysis at R.T. (Figure S3-1, Spectrum 8). Then Ar was exchanged for O<sub>2</sub>, and the reaction stirred at 90 °C for 15 min. A 100 μL aliquot of the reaction mixture was transferred into an Eppendorf tube containing 10 μL of a 20 mg/200 μL DCB sample of BMPO or DMPO, mixed on a Vortex mixer, and then a capillary tube sample removed for EPR analysis at R.T. (Figure S3-1, Spectrum 9). Then **4a** (0.017 g, 0.10 mmol) in 0.40 mL DCB was added, and the reaction stirred at 90 °C for 15 min. A 100 μL aliquot of the reaction mixture was transferred into an Eppendorf tube containing 10 μL of a 20 mg/200 μL DCB sample of BMPO or DMPO, mixed on a Vortex mixer, and then a capillary tube sample removed for EPR analysis at R.T. (Figure S3-1, Spectrum 11).

**Pathway E (spectra 10 and 12):** Co(acac)<sub>2</sub> (0.026 g, 0.10 mmol) and 4-bromophenol (0.052 g, 0.30 mmol) was added to an oven dried one dram vial. The vial was sealed with a screw-top cap containing a PTFE-lined silicon septum, and the reaction was evacuated and backfilled three times with N<sub>2</sub>. DCB (0.40 mL) was added, then put under an Ar balloon and stirred at 90 °C for 15 min. Then **4a** (0.017 g, 0.10 mmol) in 0.40 mL DCB was added, and the reaction stirred at 90 °C for 15 min. A 100 μL aliquot of the reaction mixture was transferred into an Eppendorf tube containing 10 μL of a 20 mg/200 μL DCB sample of BMPO or DMPO, mixed on a Vortex mixer, and then a capillary tube sample removed for EPR analysis at R.T. (Figure S3-1, Spectrum 10). Then Ar was exchanged for O<sub>2</sub>, and the reaction stirred at 90 °C for 15 min. A 100 μL aliquot of the reaction mixture was transferred into an Eppendorf tube containing 10 μL of a 20 mg/200 μL DCB sample of BMPO or DMPO, mixed on a Vortex mixer, and then a capillary tube sample removed for EPR analysis at R.T. (Figure S3-1, Spectrum 12).

**Pathway F (spectra 13, 14, and 16):** Co(acac)<sub>2</sub> (0.026 g, 0.10 mmol) and **4a** (0.017 g, 0.10 mmol) was added to an oven dried one dram vial. The vial was sealed with a screw-top cap containing a PTFE-lined silicon septum, and the reaction was evacuated and backfilled three times with N<sub>2</sub>. DCB (0.40 mL) was added, then put under an Ar balloon and stirred at 90 °C for 15 min. A 100 μL aliquot of the reaction mixture was transferred into an Eppendorf tube containing 10 μL of a 20 mg/200 μL DCB sample of BMPO or DMPO, mixed on a Vortex mixer, and then a capillary tube sample removed for EPR analysis at R.T. (Figure S3-1, Spectrum 13). Then Ar was exchanged for O<sub>2</sub>, and the reaction stirred at 90 °C for 15 min. A 100 μL aliquot of the reaction mixture was transferred into an Eppendorf tube containing 10 μL of a 20 mg/200 μL DCB sample of BMPO or DMPO, mixed on a Vortex mixer, and then a capillary tube sample removed for EPR analysis at R.T. (Figure S3-1, Spectrum 14). Then 4-bromophenol (0.052 g, 0.30 mmol) in 0.40 mL DCB was added, and the reaction stirred at 90 °C for 15 min. A 100 μL aliquot of the reaction mixture was transferred into an Eppendorf tube containing 10 μL of a 20 mg/200 μL DCB sample of BMPO or DMPO, mixed on a Vortex mixer, and then a capillary tube sample removed for EPR analysis at R.T. (Figure S3-1, Spectrum 16).

**Pathway G (spectrum 15):** Co(acac)<sub>2</sub> (0.026 g, 0.10 mmol) and **4a** (0.017 g, 0.10 mmol) was added to an oven dried one dram vial. The vial was sealed with a screw-top cap containing a PTFE-lined silicon septum, and the reaction was evacuated and backfilled three times with N<sub>2</sub>. DCB (0.40 mL) was added, then put under an Ar balloon and stirred at 90 °C for 15 min. Then 4-bromophenol (0.052 g, 0.30 mmol) in 0.40 mL DCB was added, and the reaction stirred at 90 °C for 15 min. A 100 μL aliquot of the reaction mixture was transferred into an Eppendorf tube containing 10 μL of a 20 mg/200 μL DCB sample of BMPO or DMPO, mixed on a Vortex mixer, and then a capillary tube sample removed for EPR analysis at R.T. (Figure S3-1, Spectrum 15).

### EPR Parameters from Spin Trapping Experimentation

|                           |                     |                     |       |
|---------------------------|---------------------|---------------------|-------|
| Center Field (mT)         | 344                 |                     |       |
| Sweep Width (mT)          | 15                  |                     |       |
| Microwave Frequency (GHz) | 9.6426              |                     |       |
| G                         | 2.0055              |                     |       |
| A (MHz)                   | 1 – <sup>14</sup> N | 35.3525 (1.2615 mT) | N = 1 |
|                           | 2 – <sup>1</sup> H  | 20.0400 (0.6161 mT) | N = 1 |
| Iwpp (mT)                 | 0.45                |                     |       |

|                           |                     |                   |       |
|---------------------------|---------------------|-------------------|-------|
| Center Field (mT)         | 344                 |                   |       |
| Sweep Width (mT)          | 15                  |                   |       |
| Microwave Frequency (GHz) | 9.6433              |                   |       |
| G                         | 2.0055              |                   |       |
| A (MHz)                   | 1 – <sup>14</sup> N | 39.2349 (1.40 mT) | N = 1 |
|                           | 2 – <sup>1</sup> H  | 64.4574 (2.30 mT) | N = 1 |
| Iwpp (mT)                 | 0.45                |                   |       |

# NMR Spectra of Compound 3

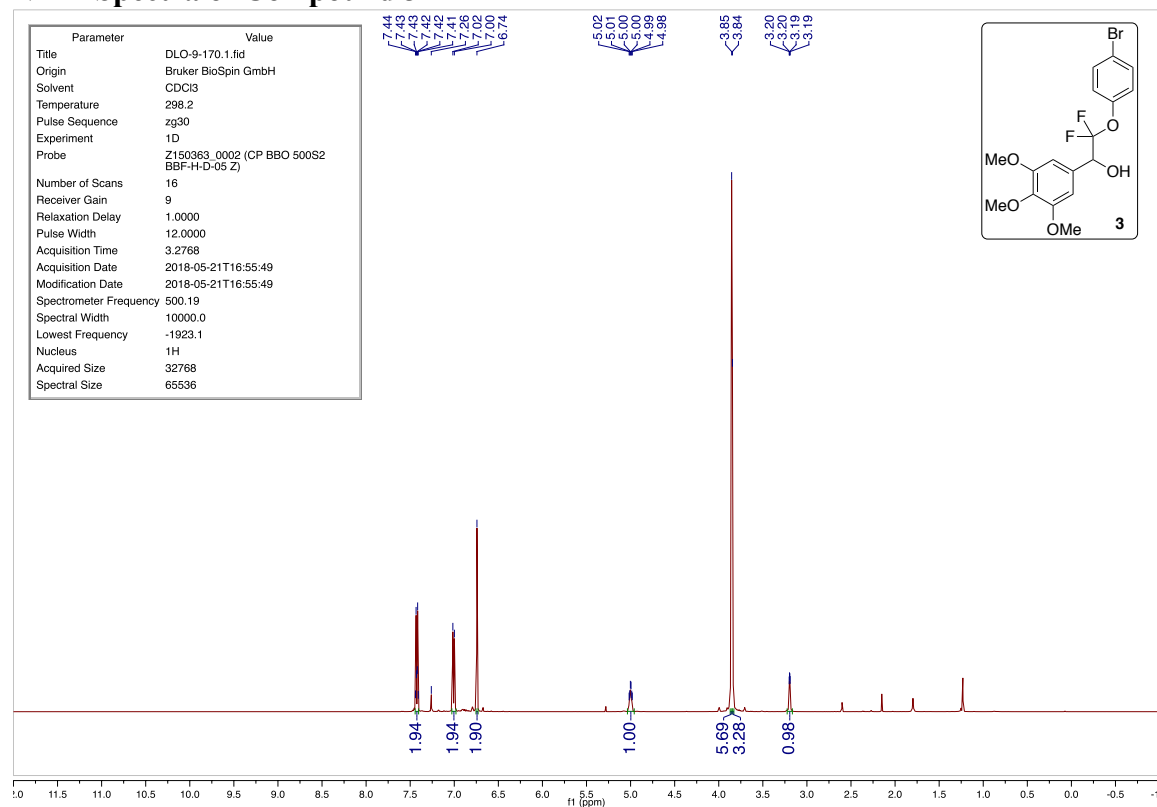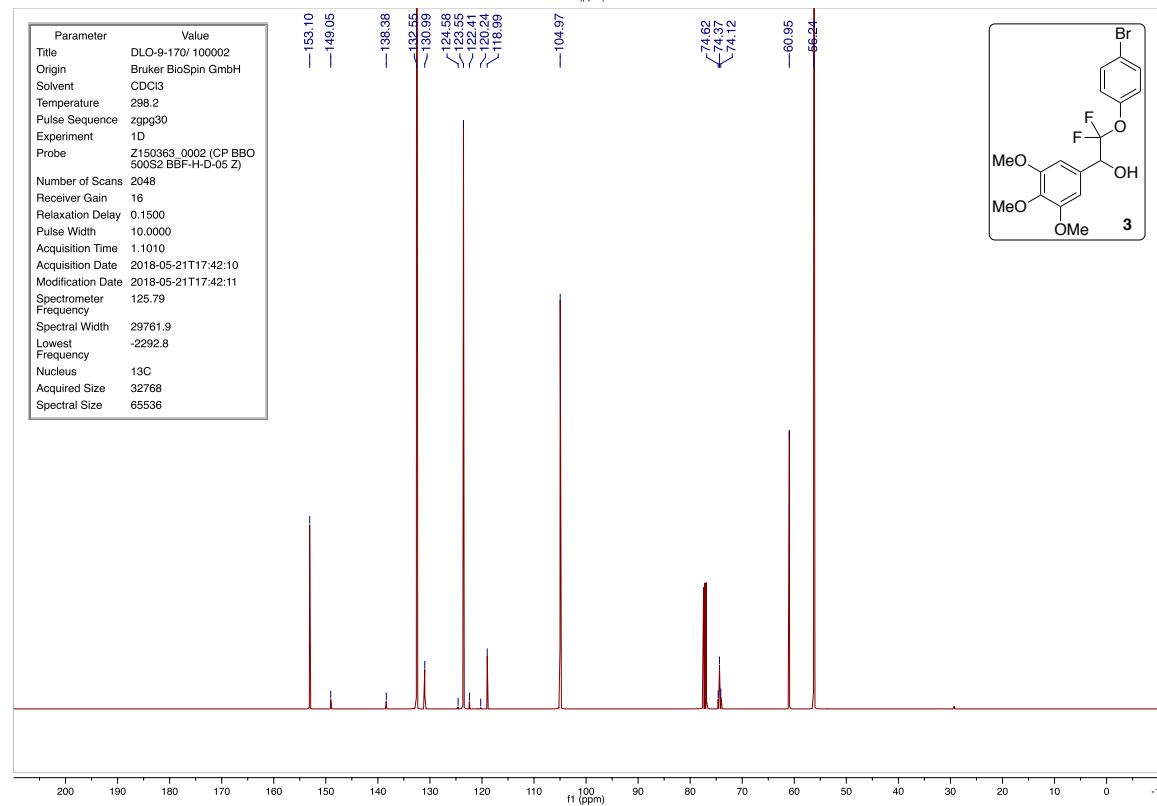

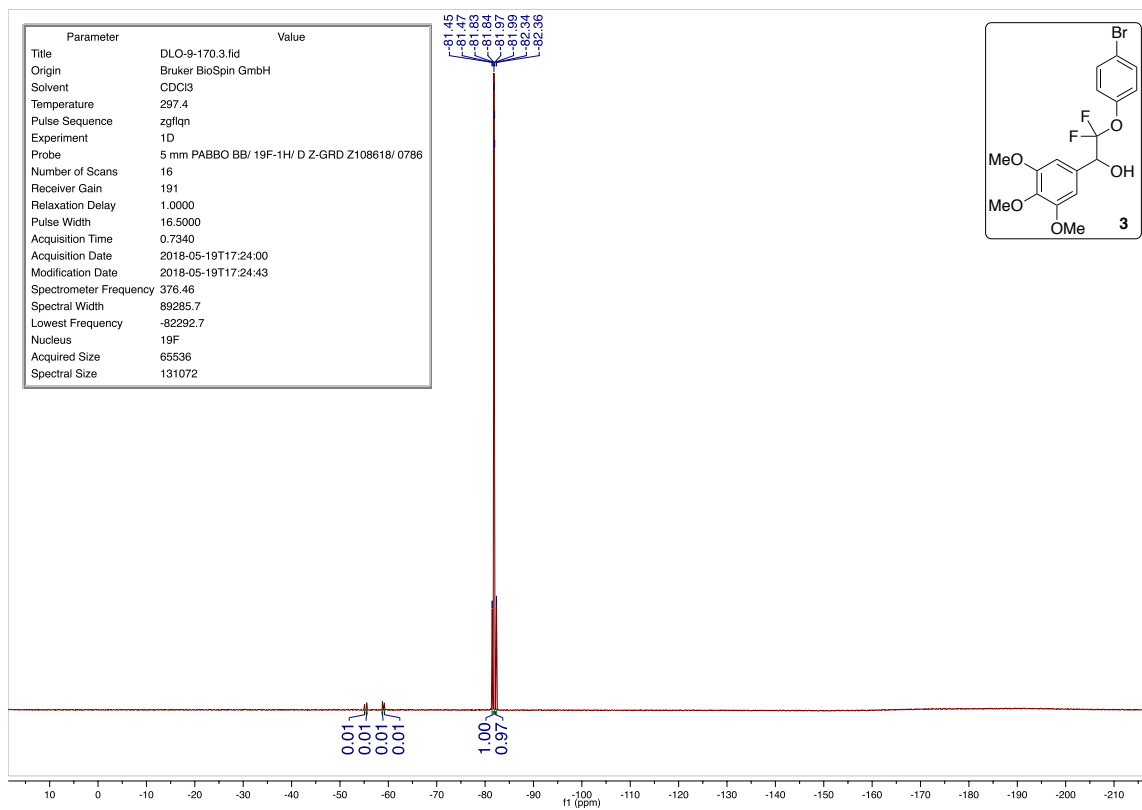

## NMR Spectra of Compounds in Table 2

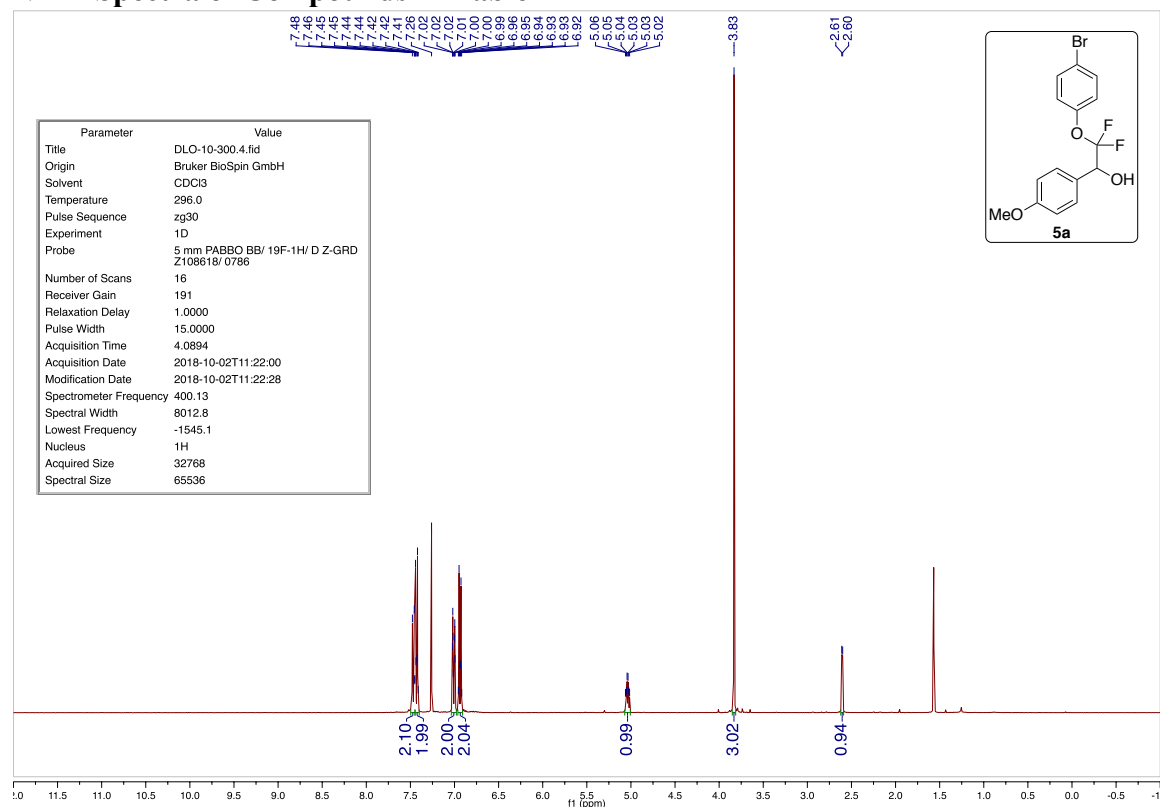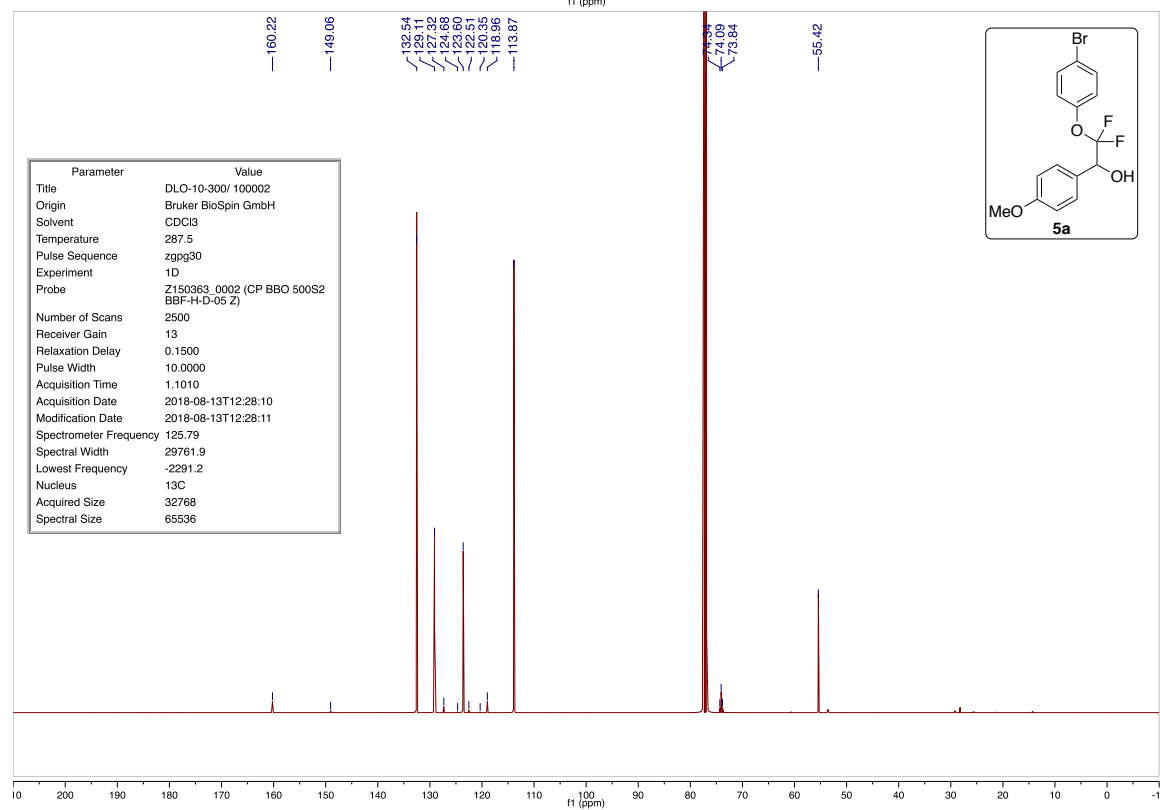

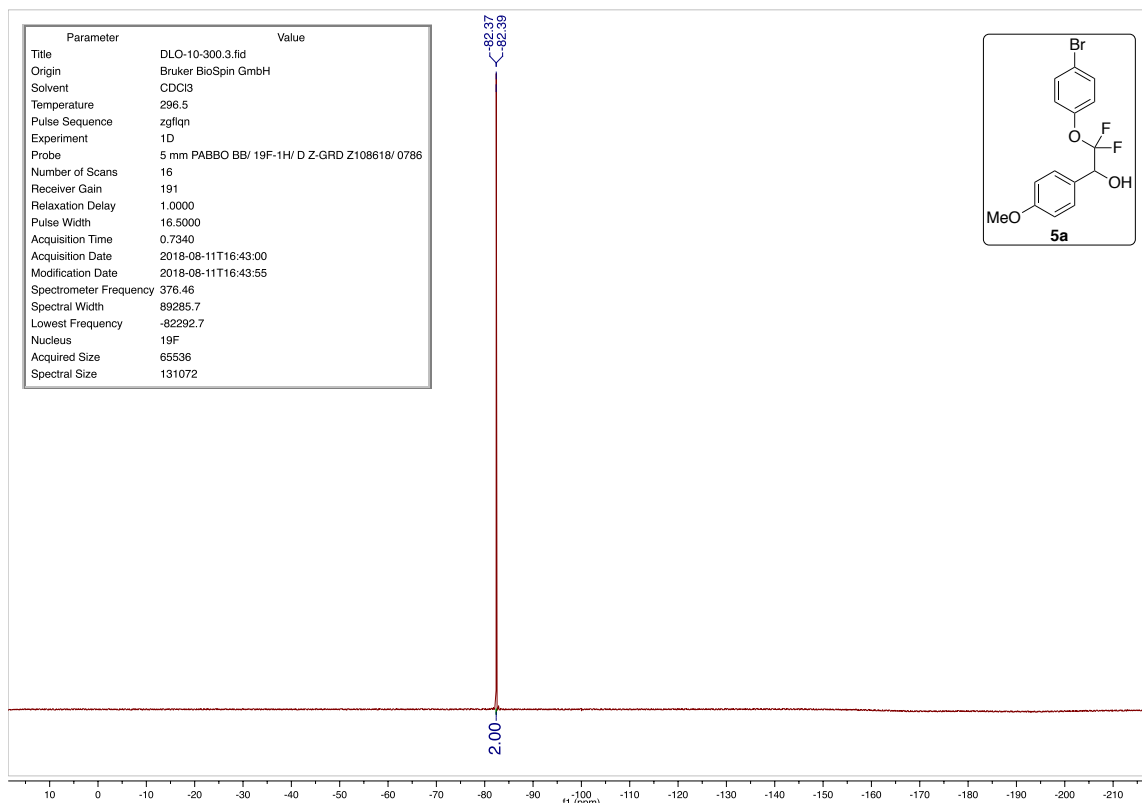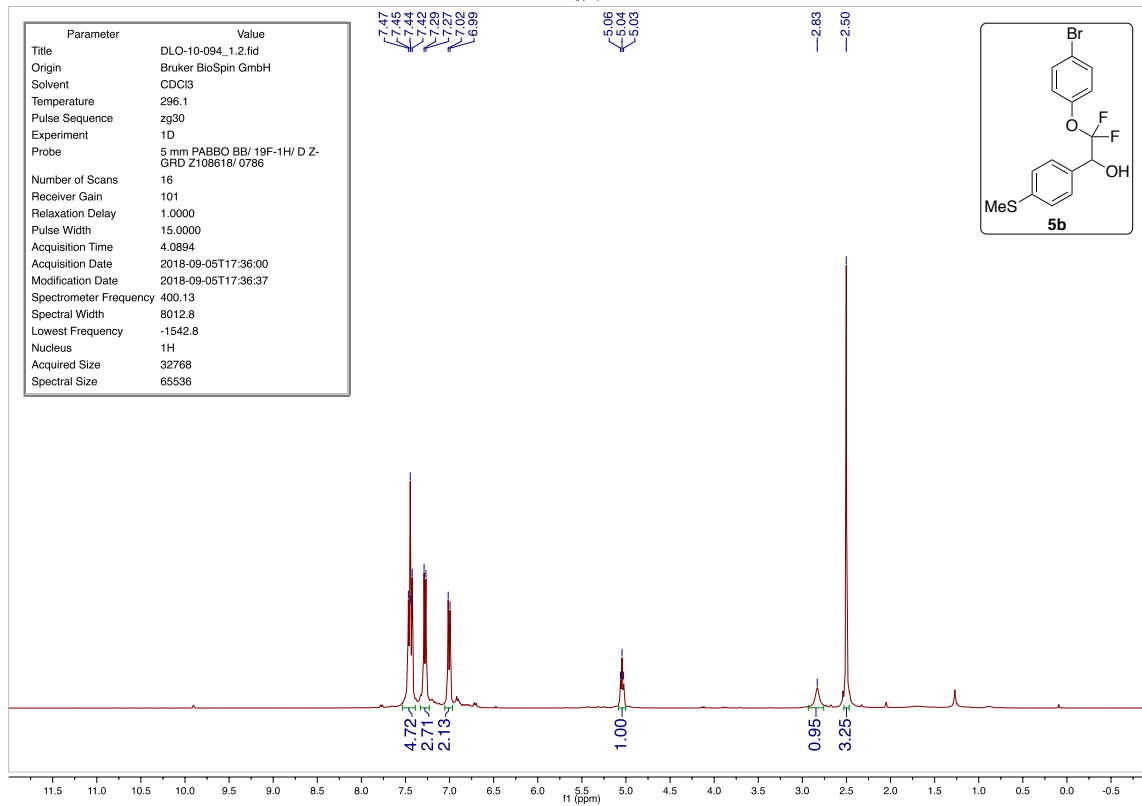

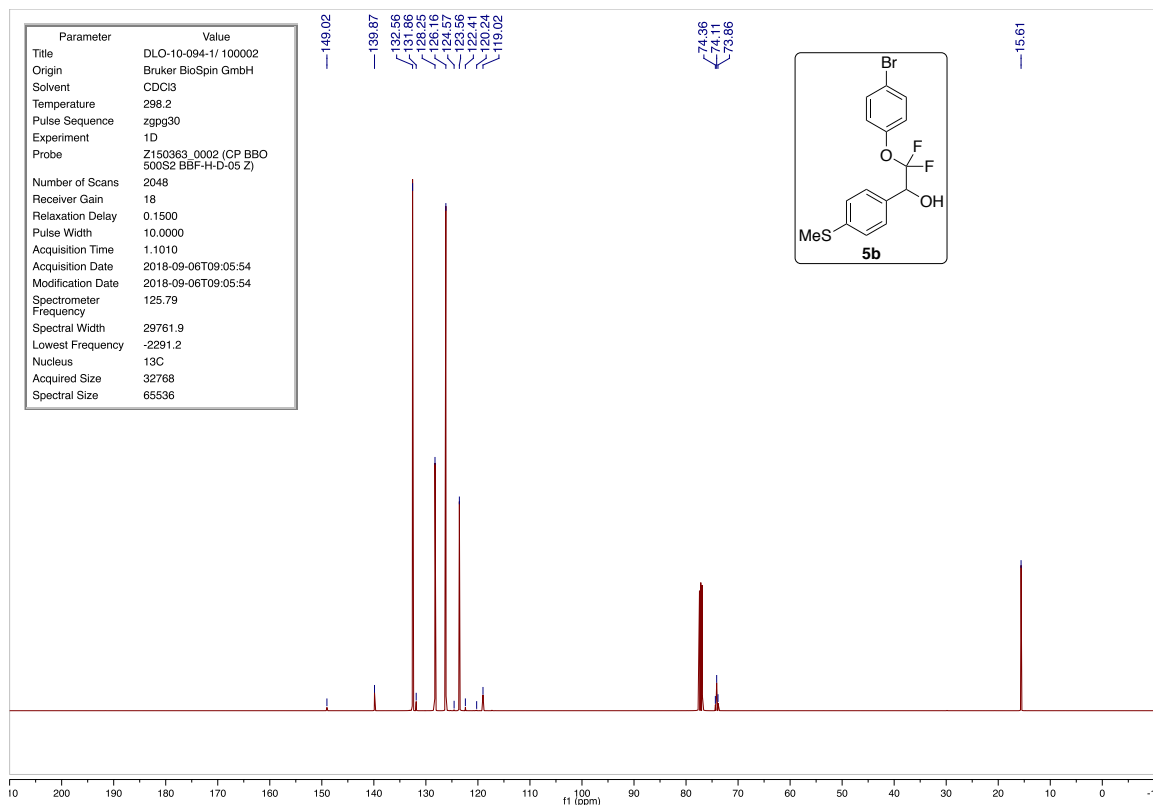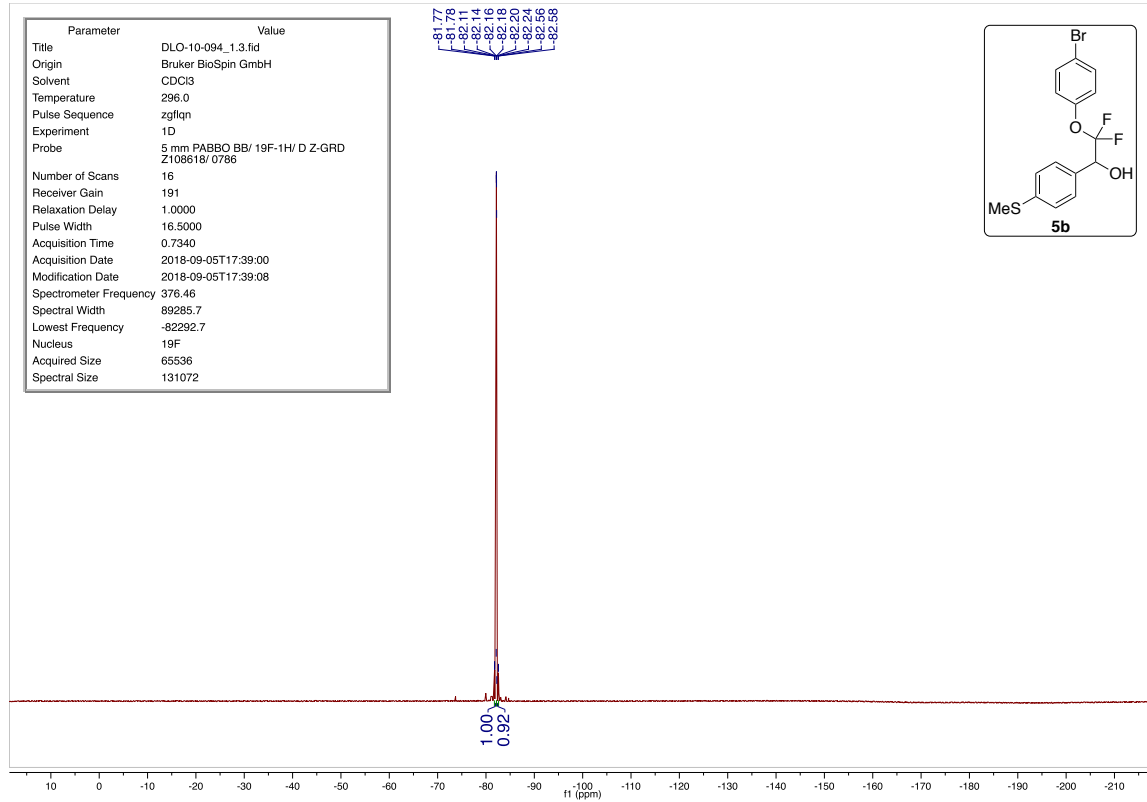

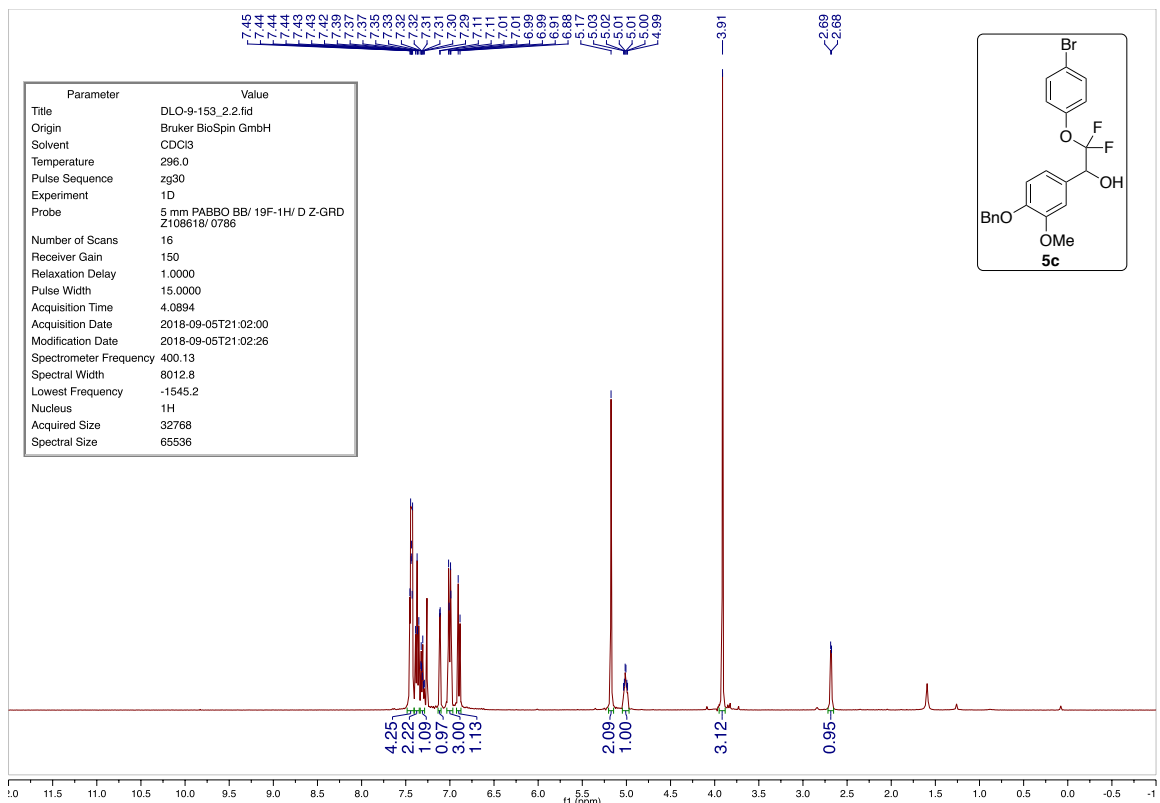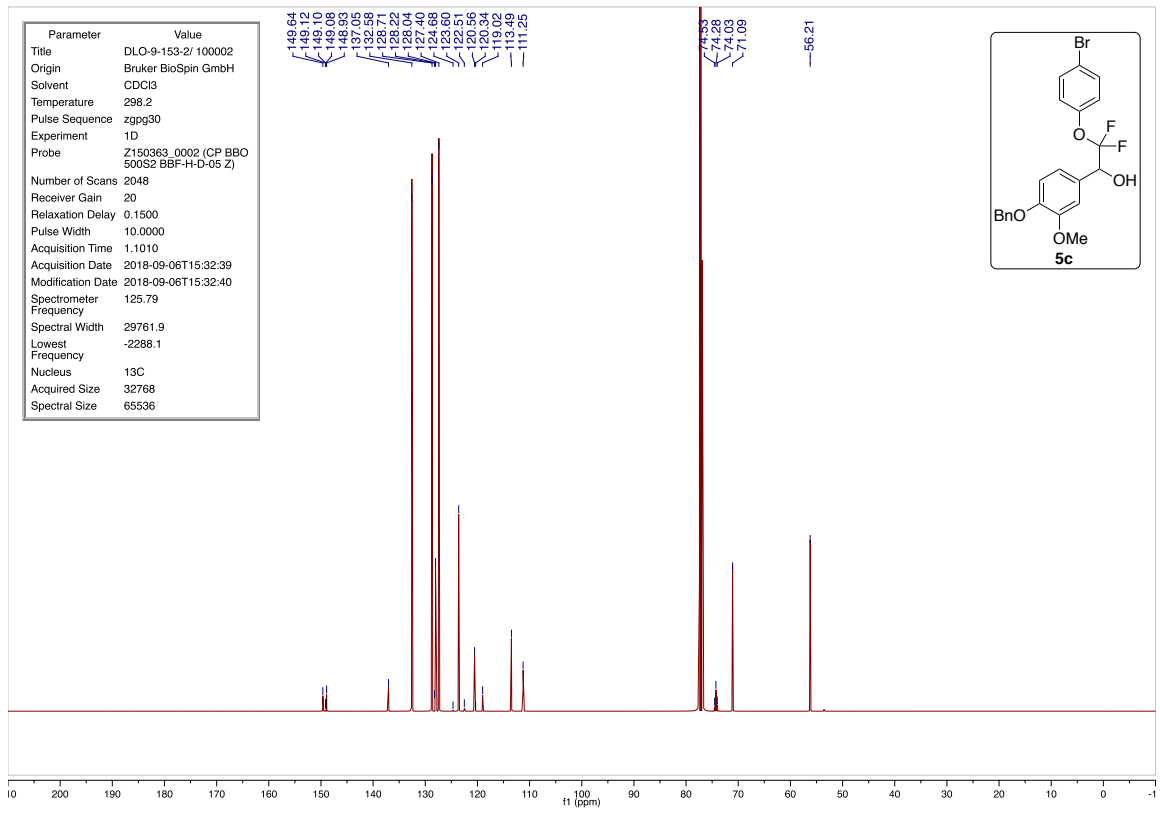



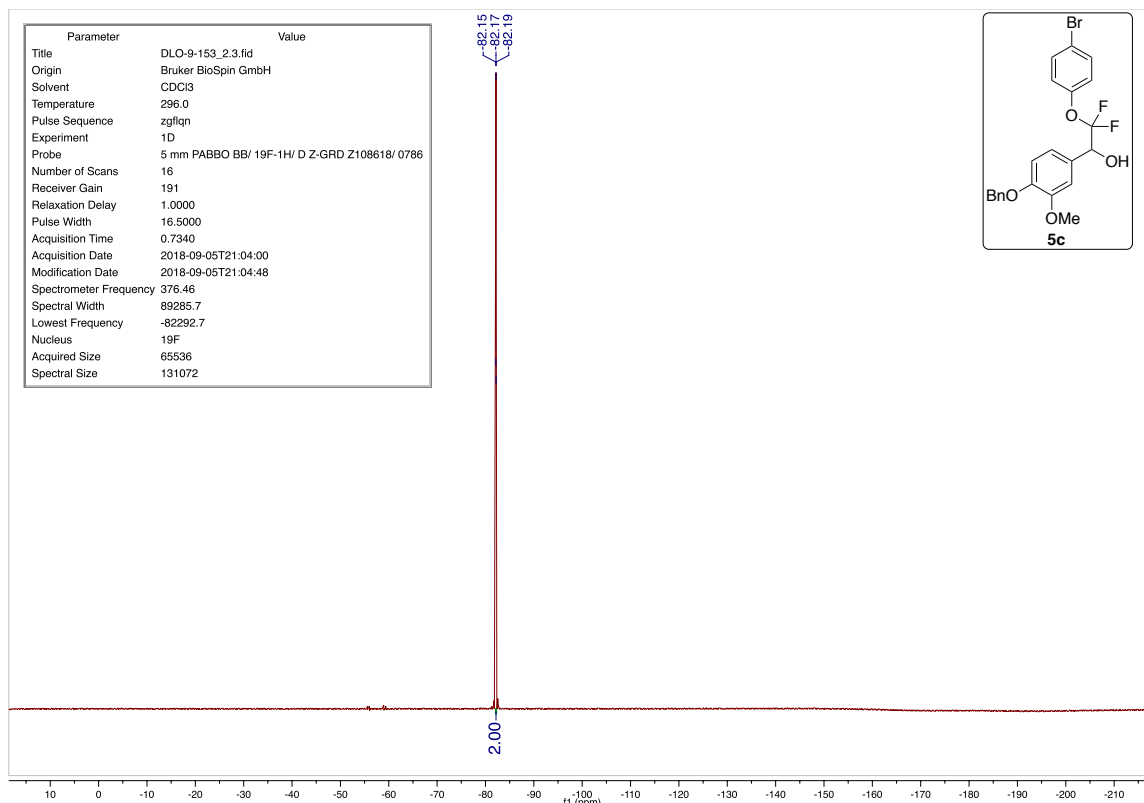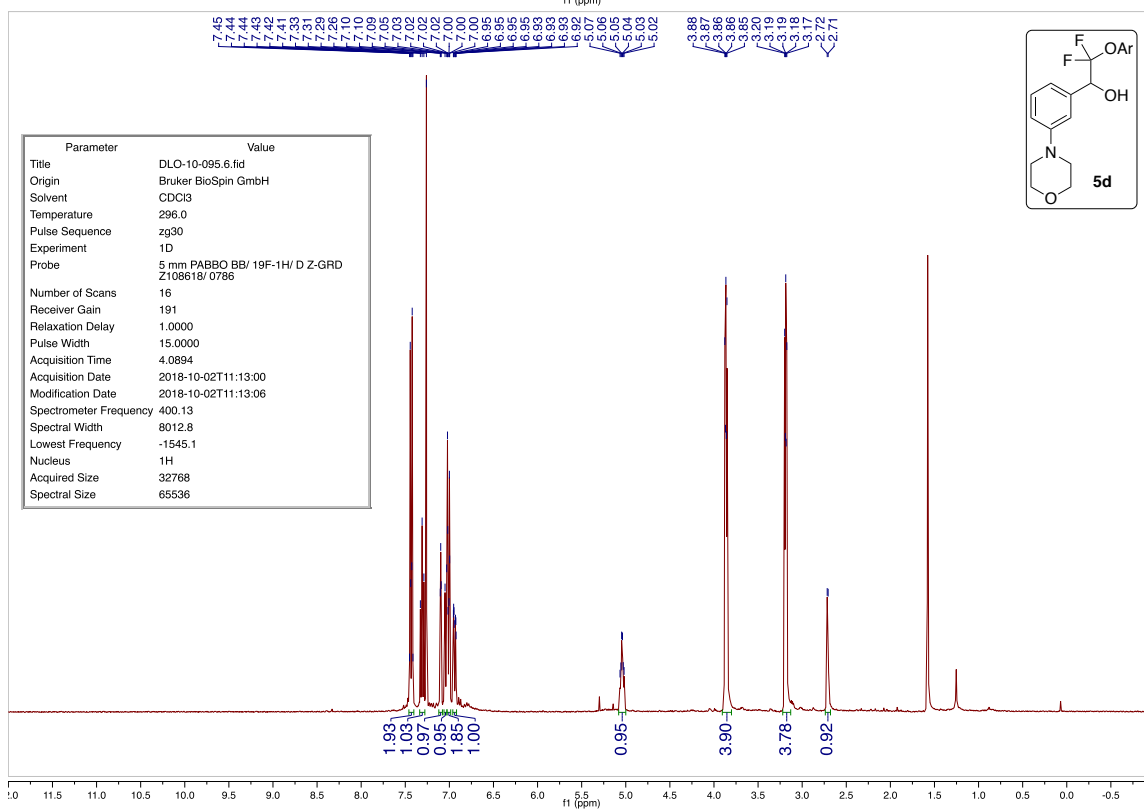

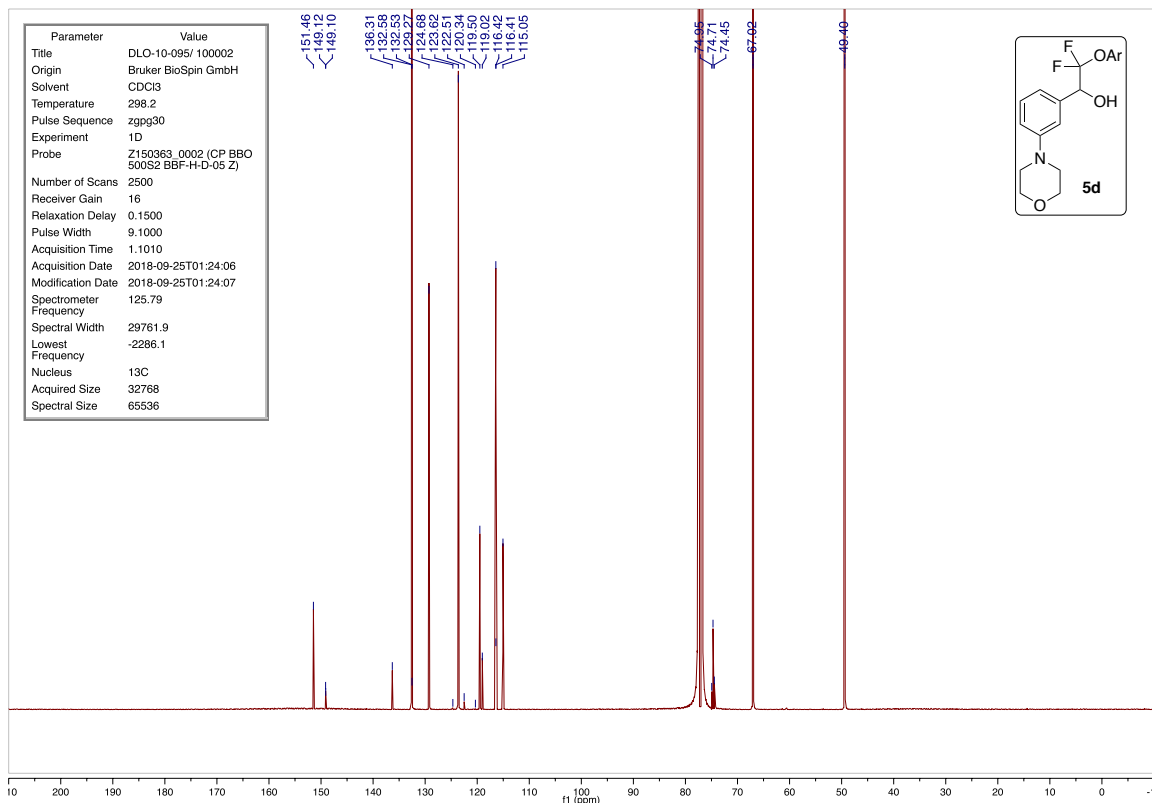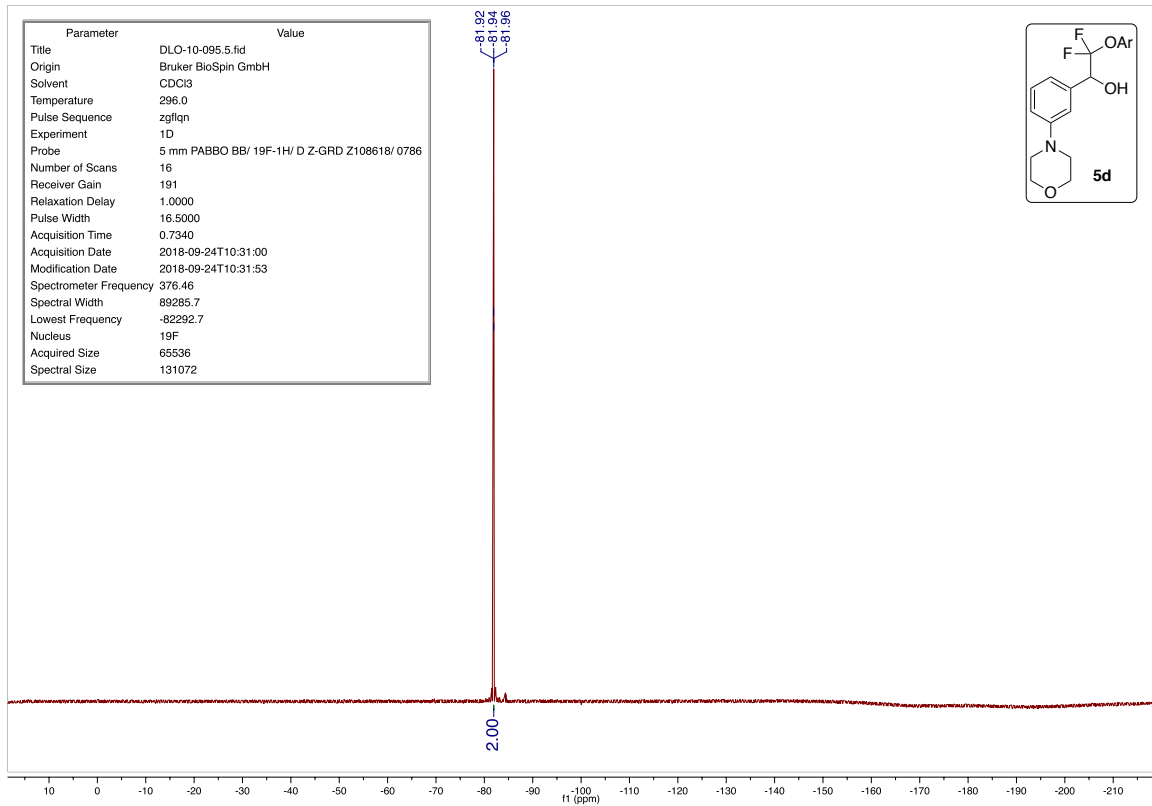

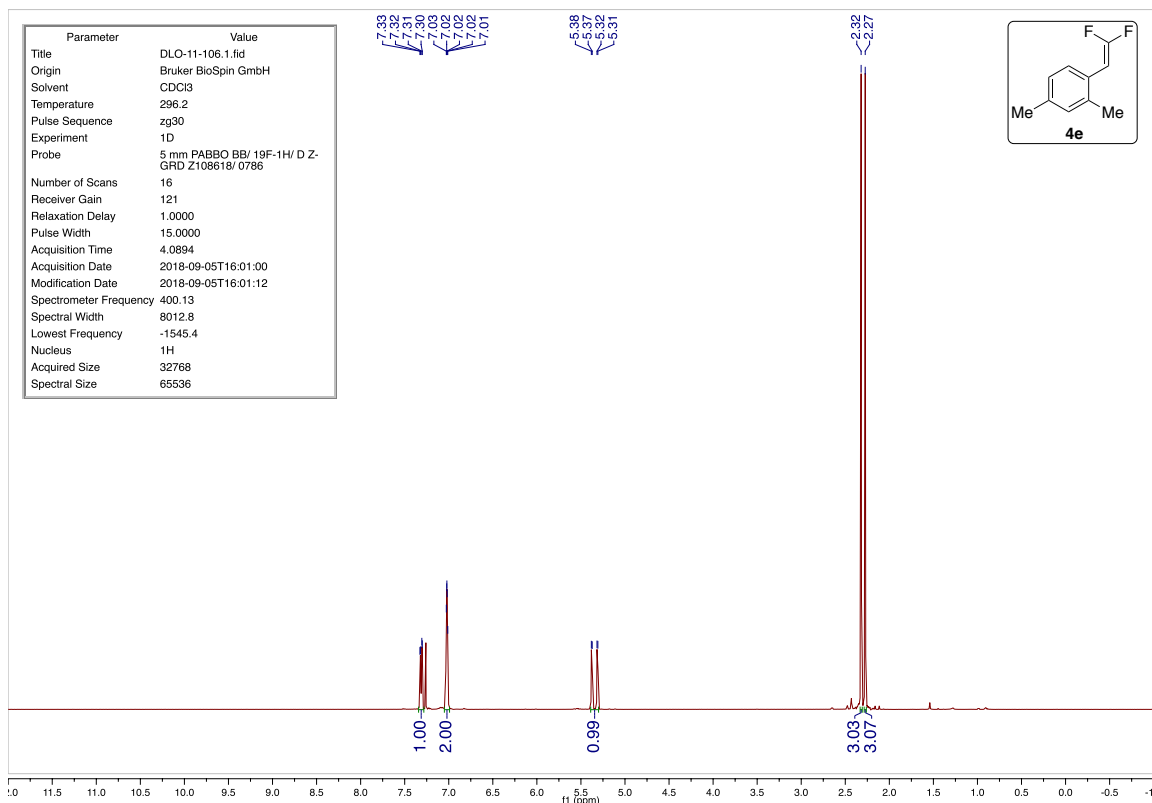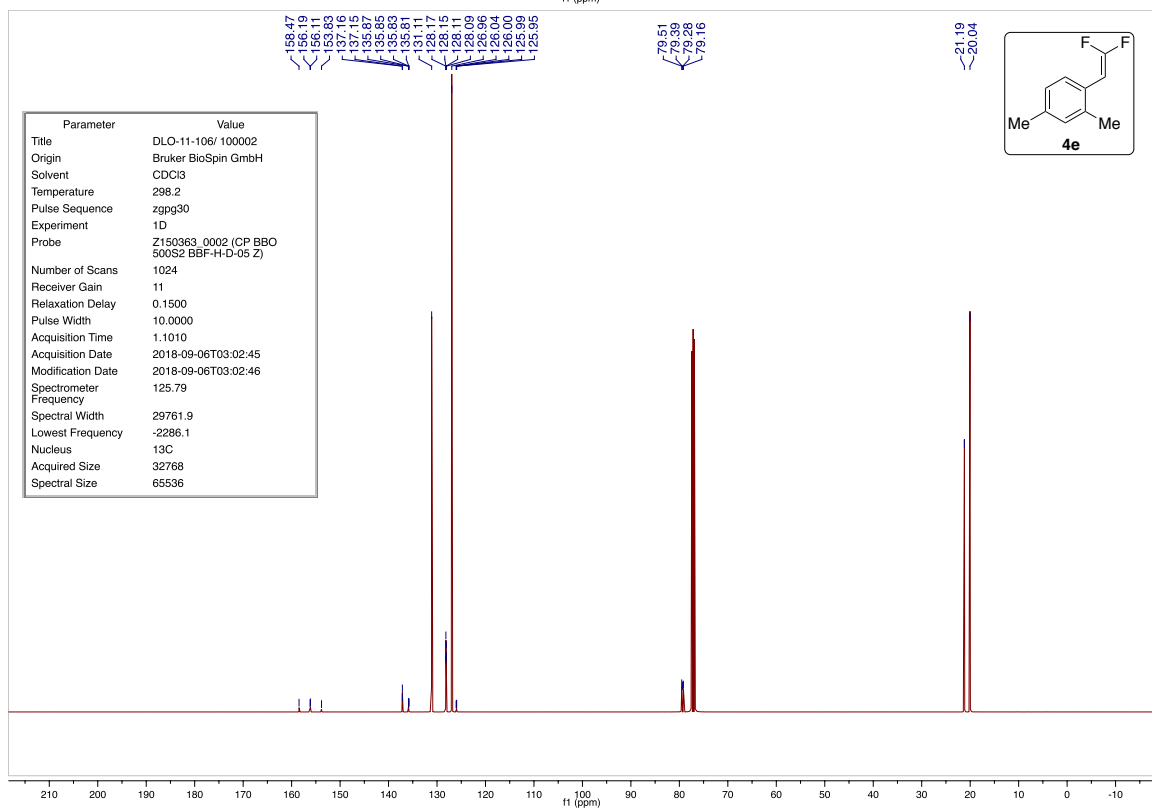

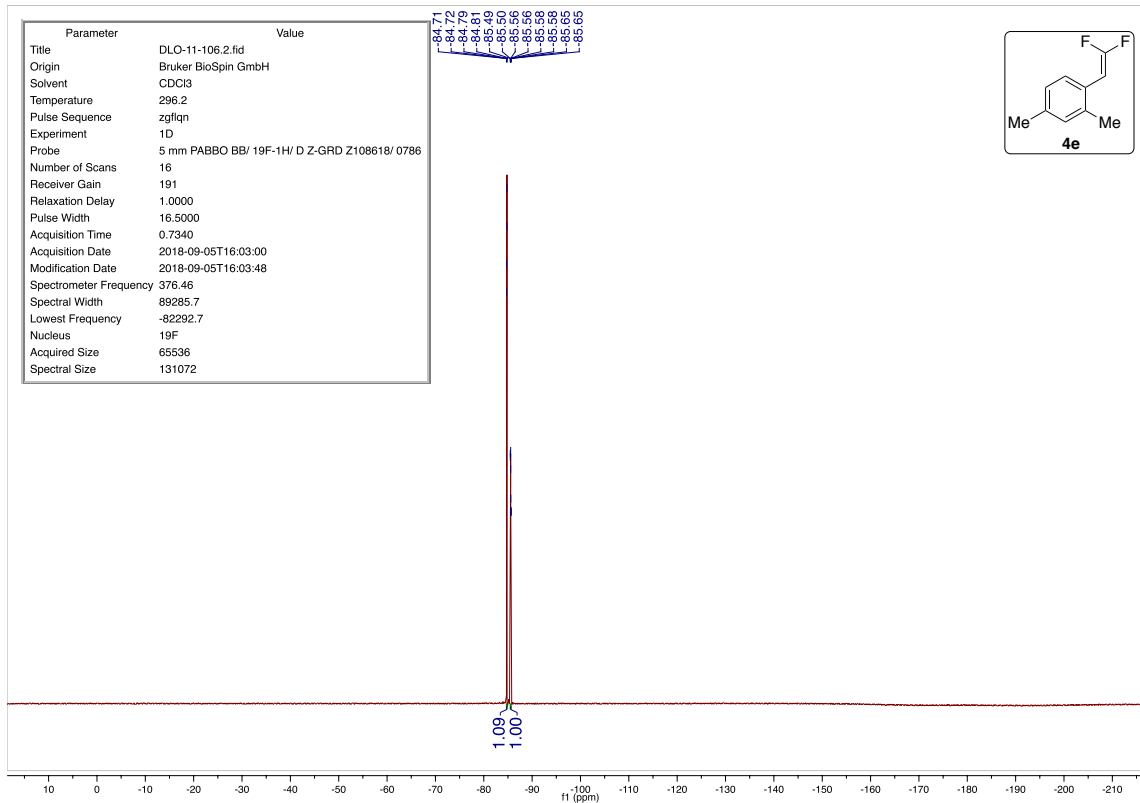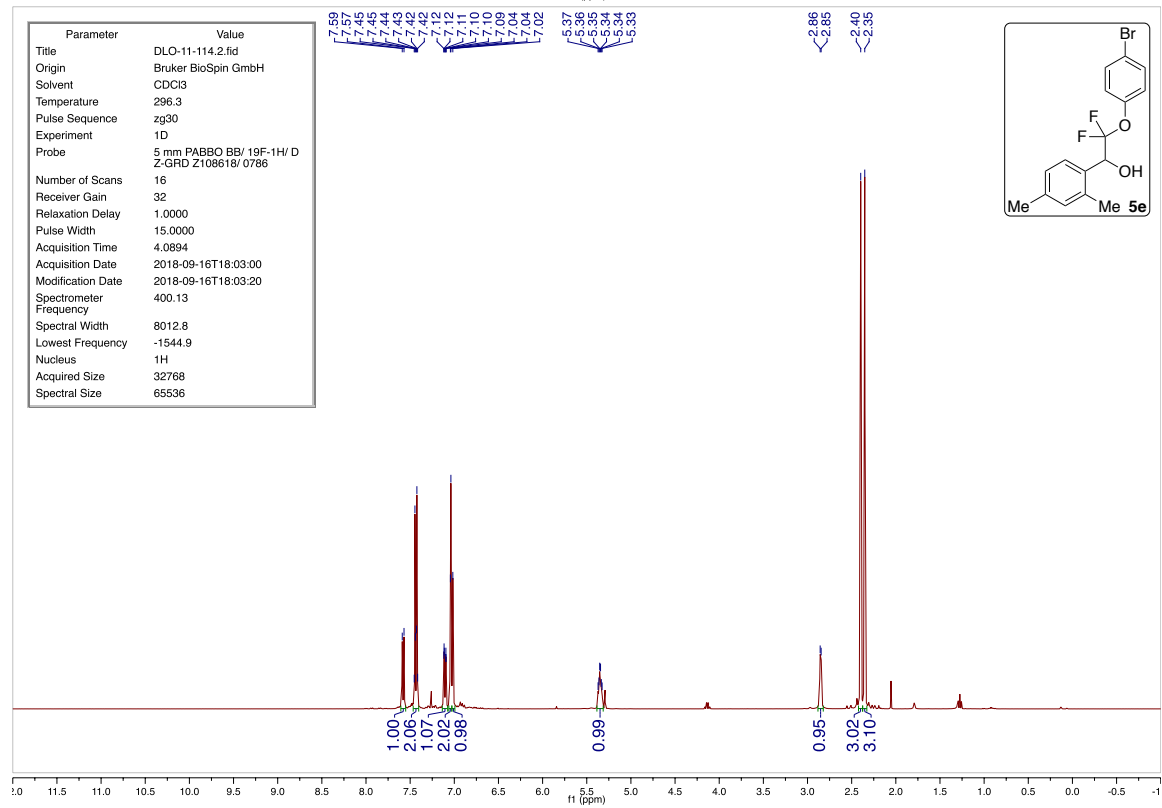

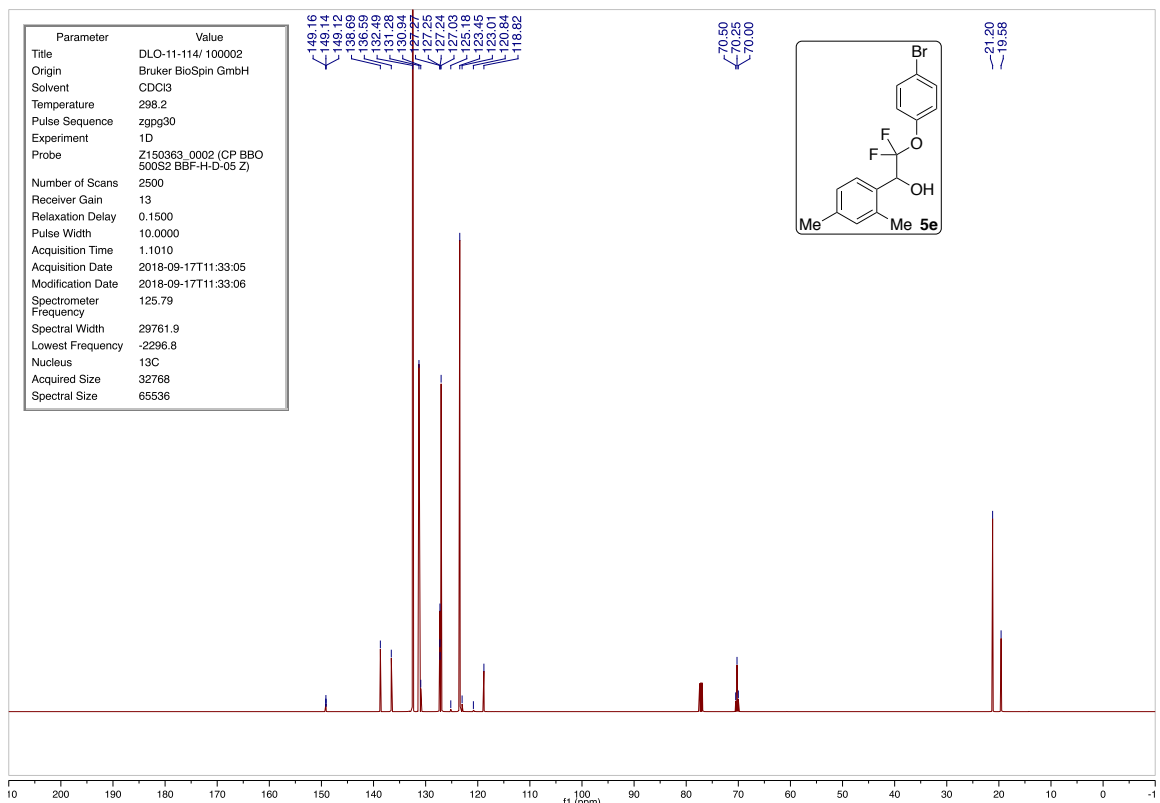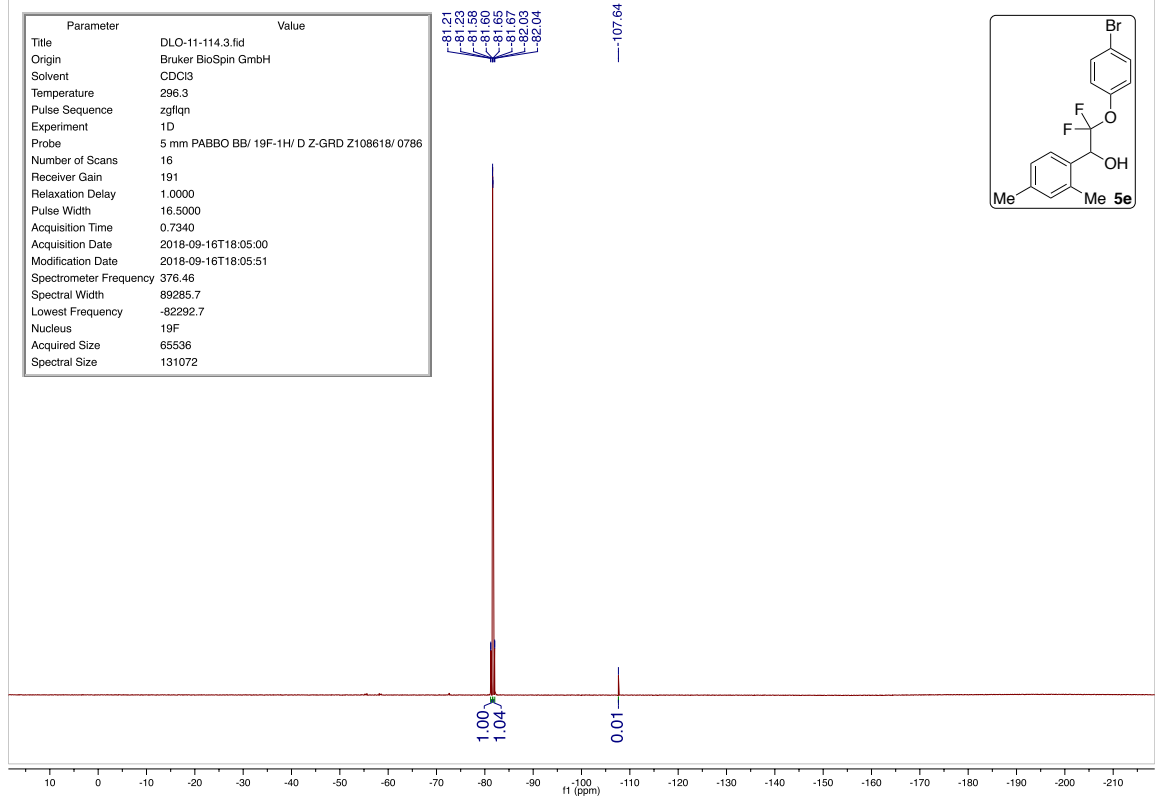

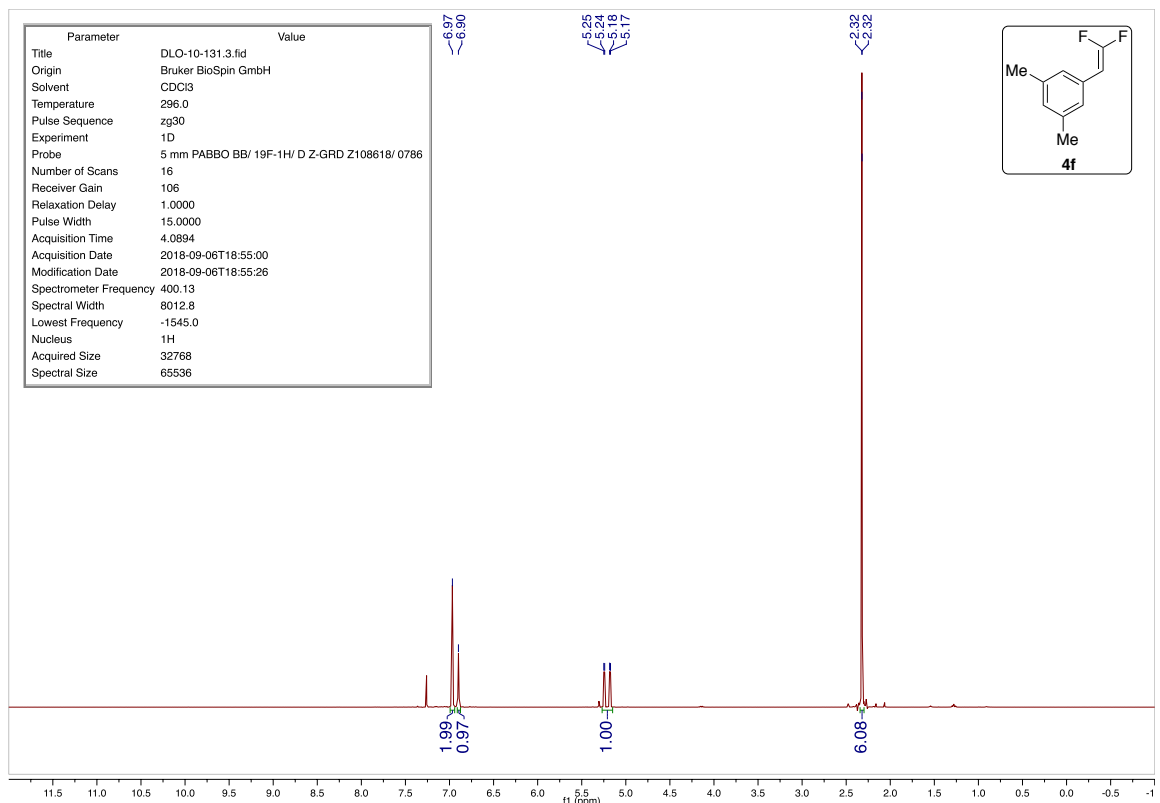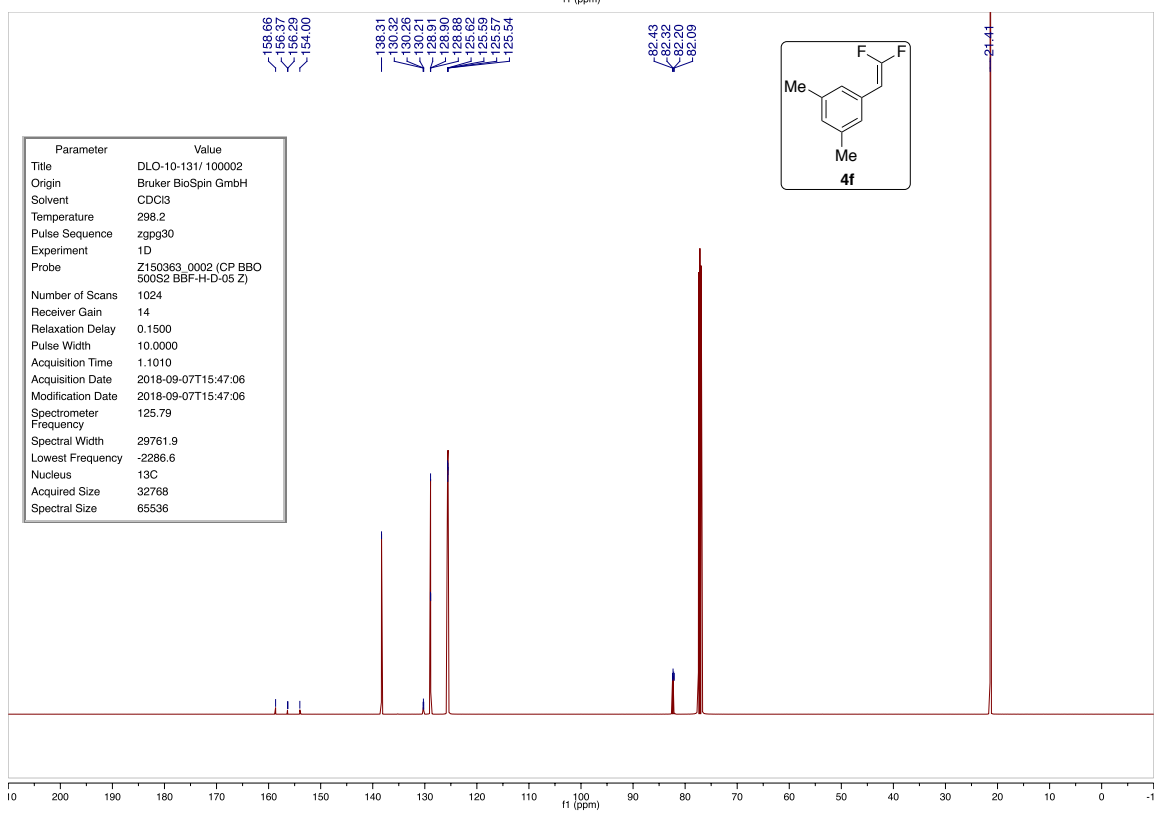

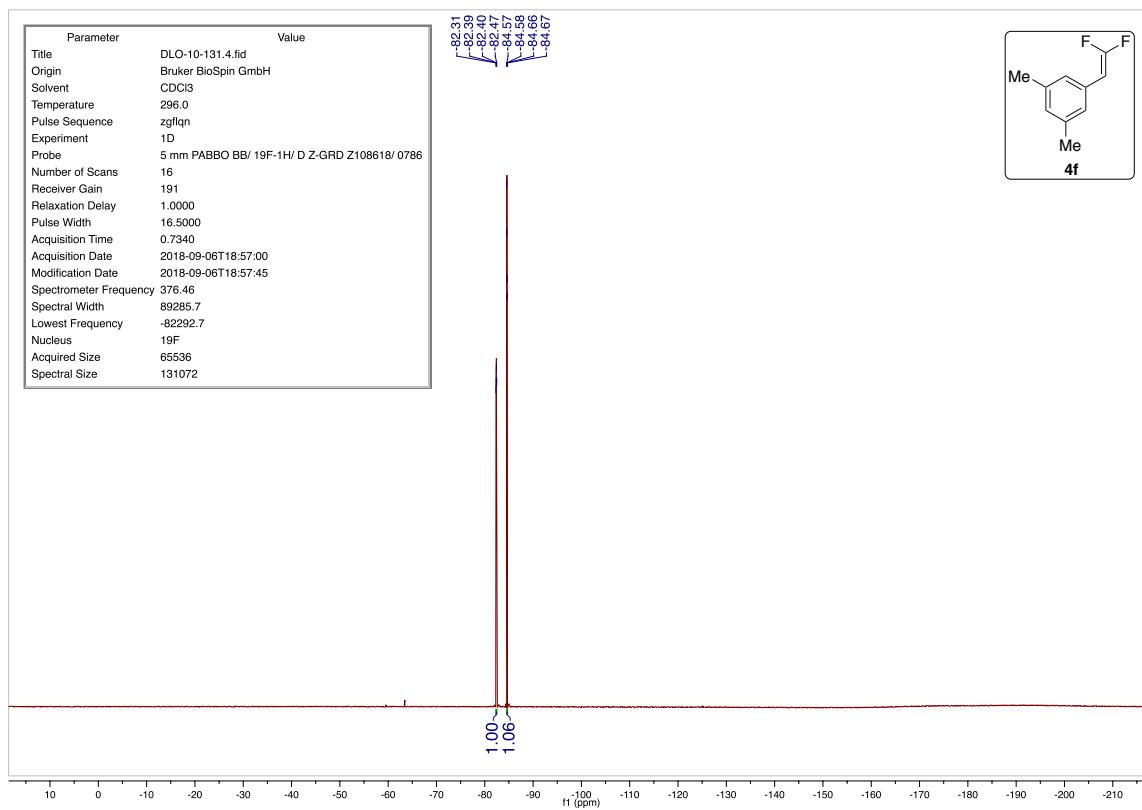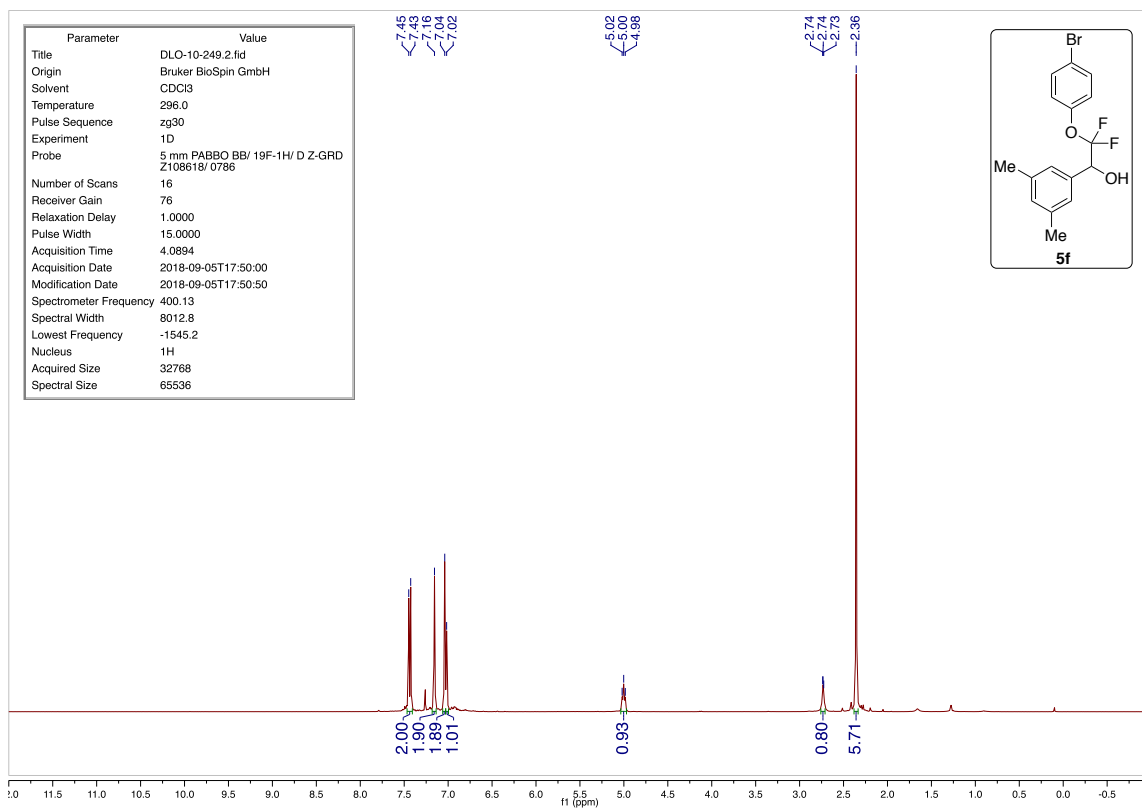

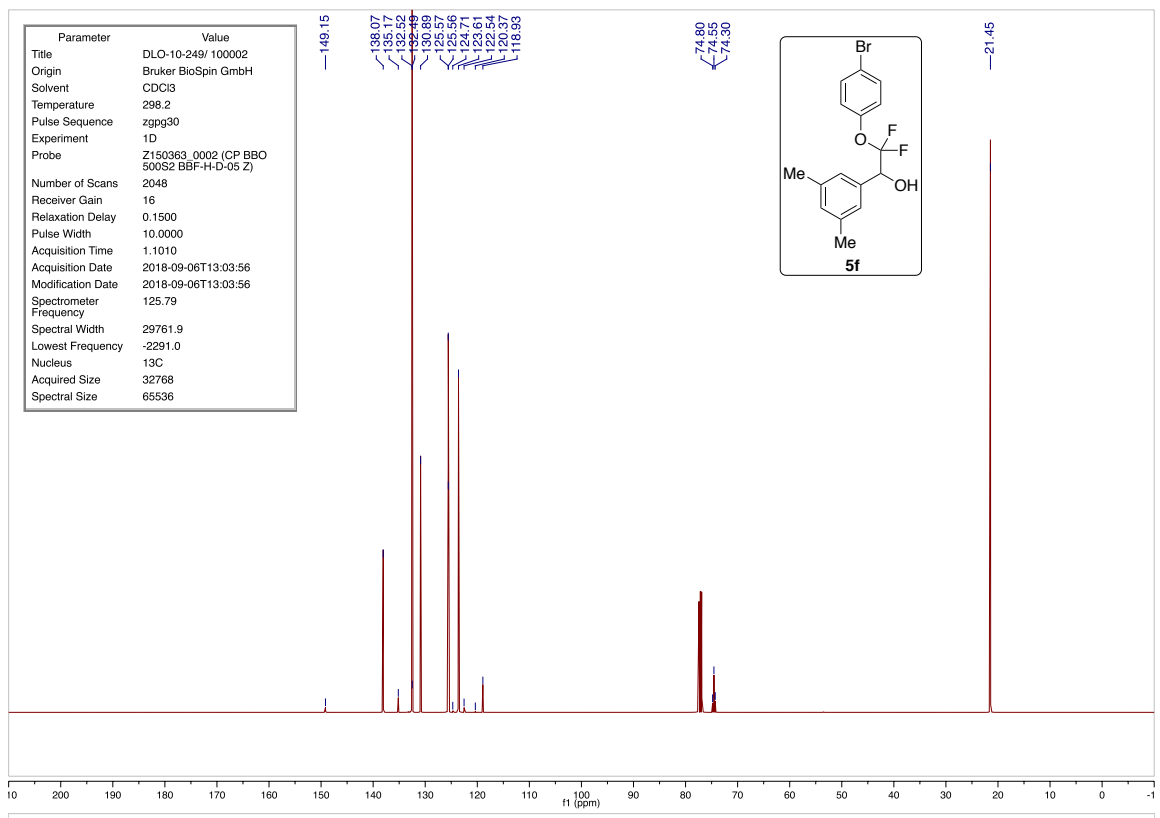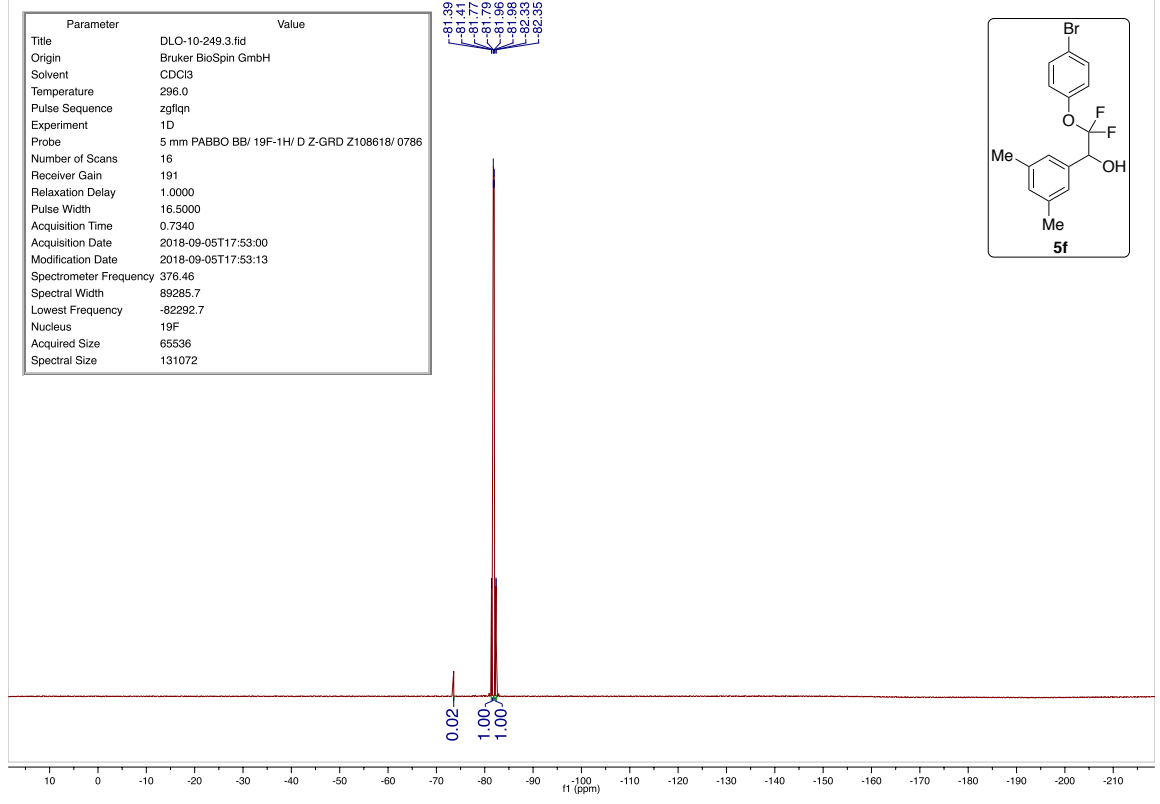



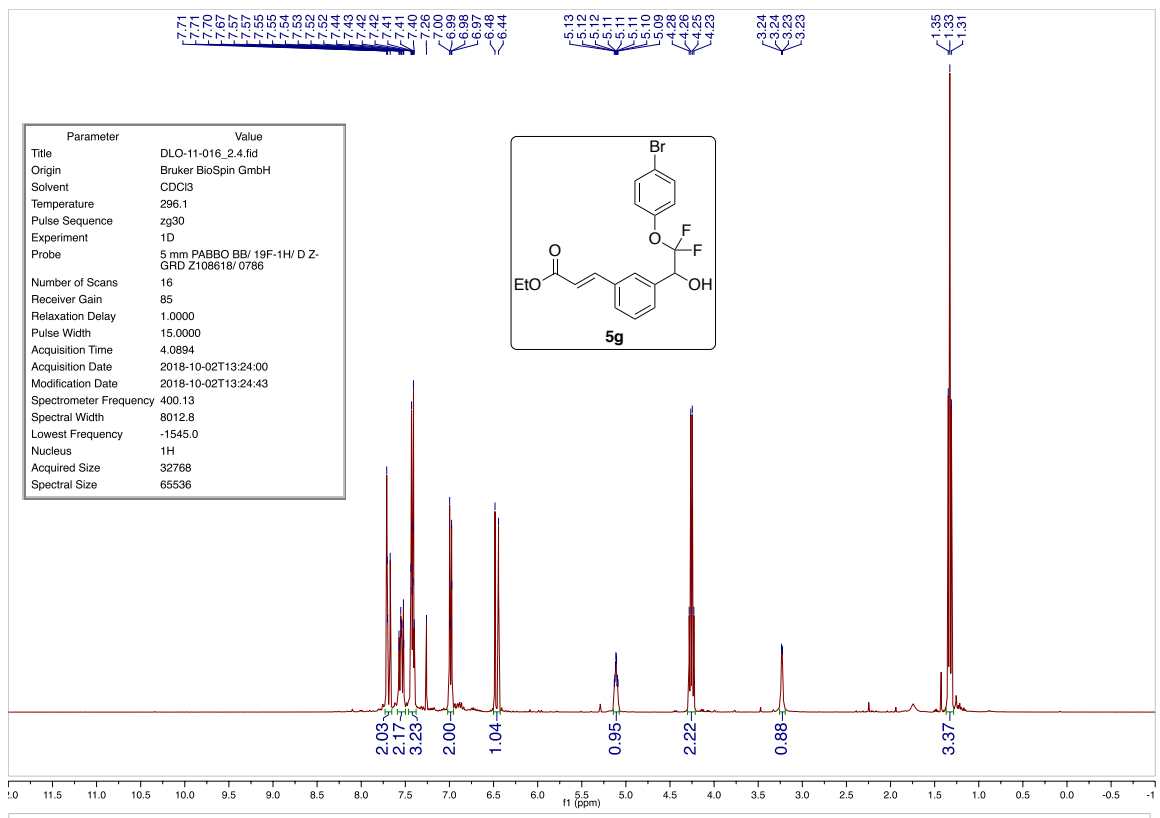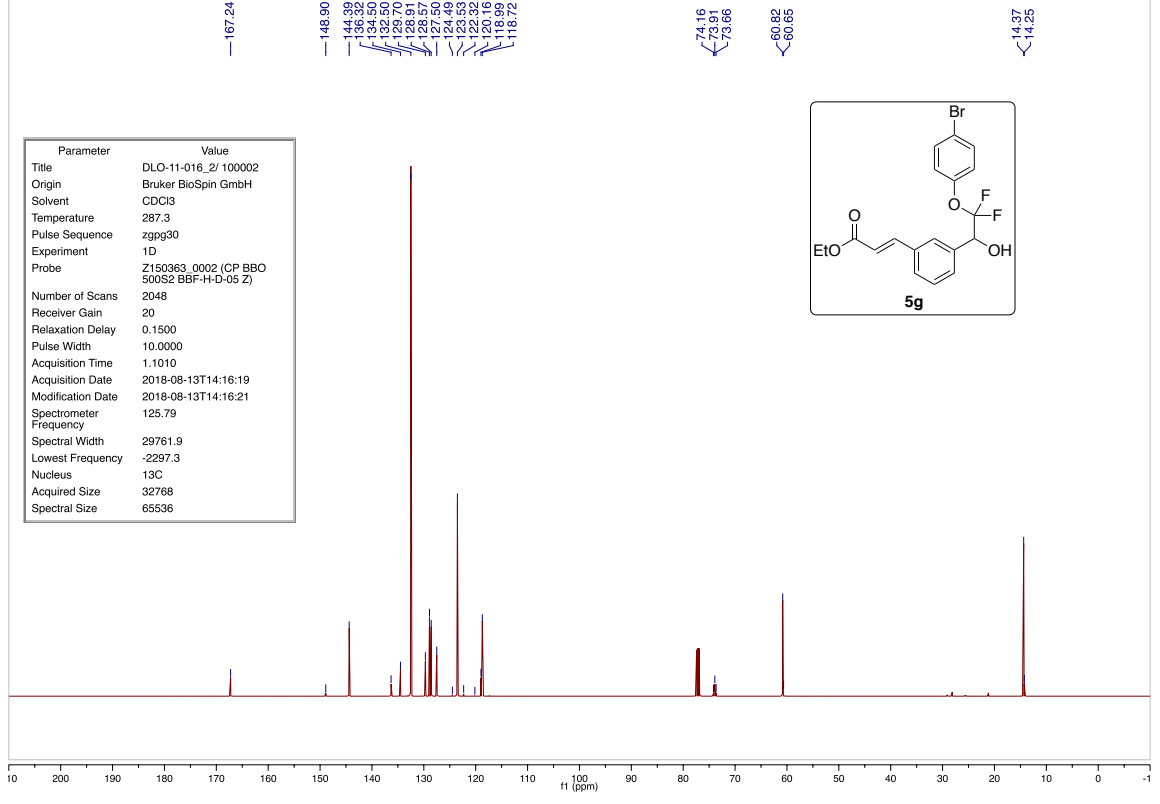

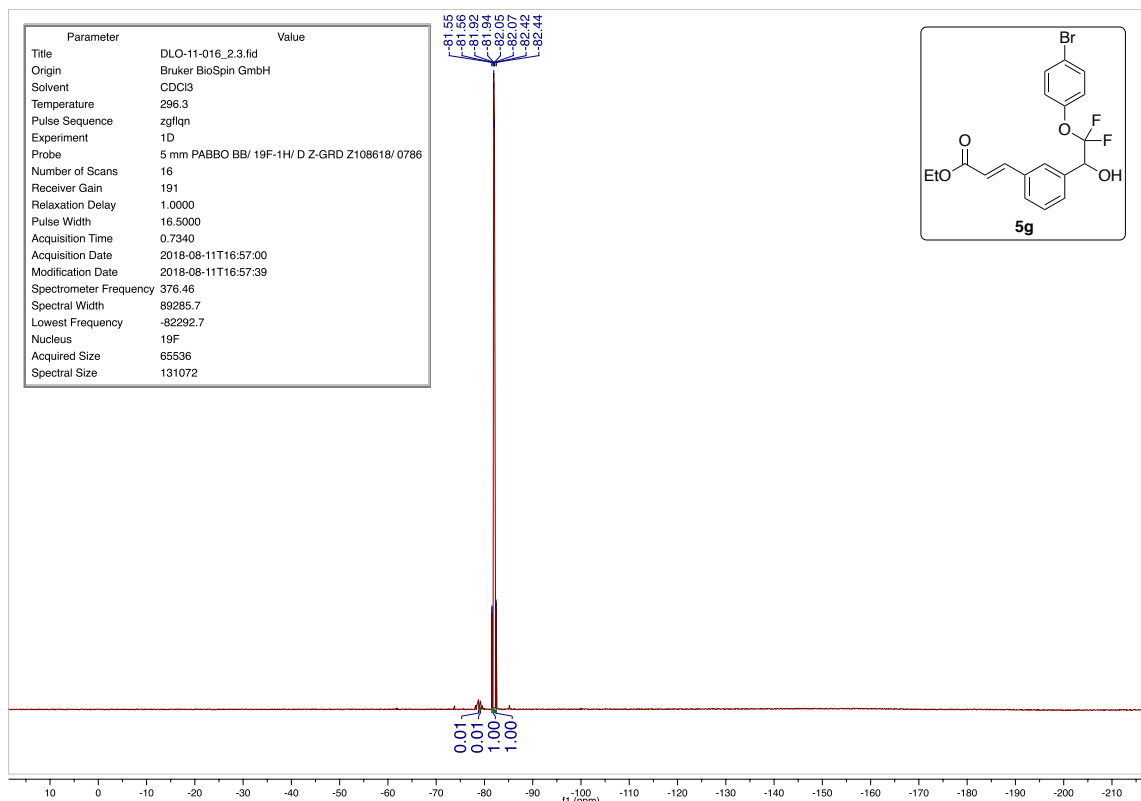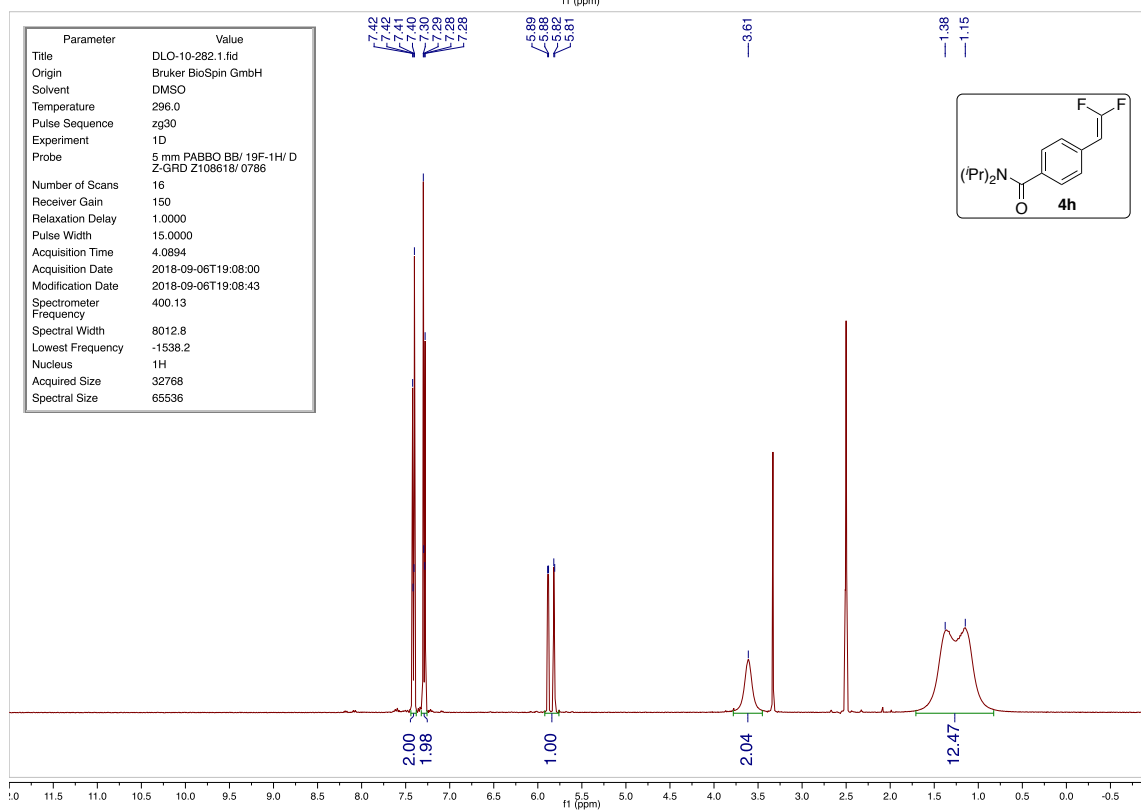

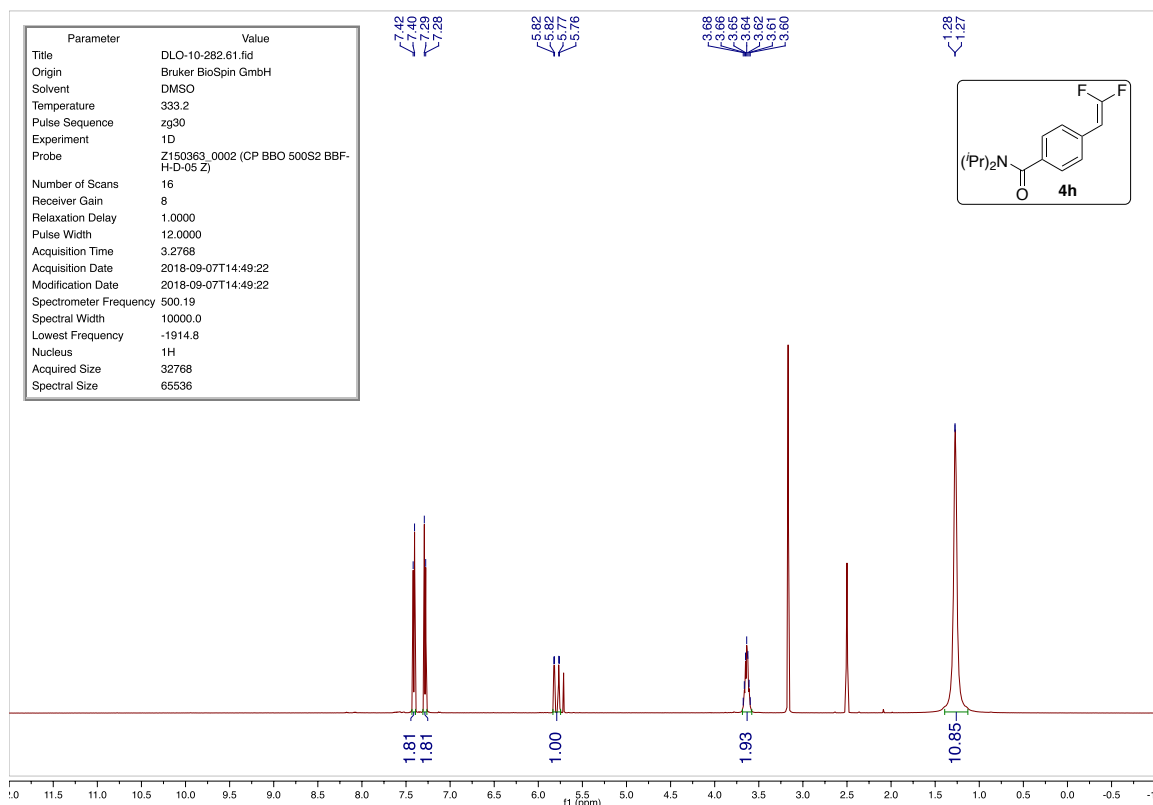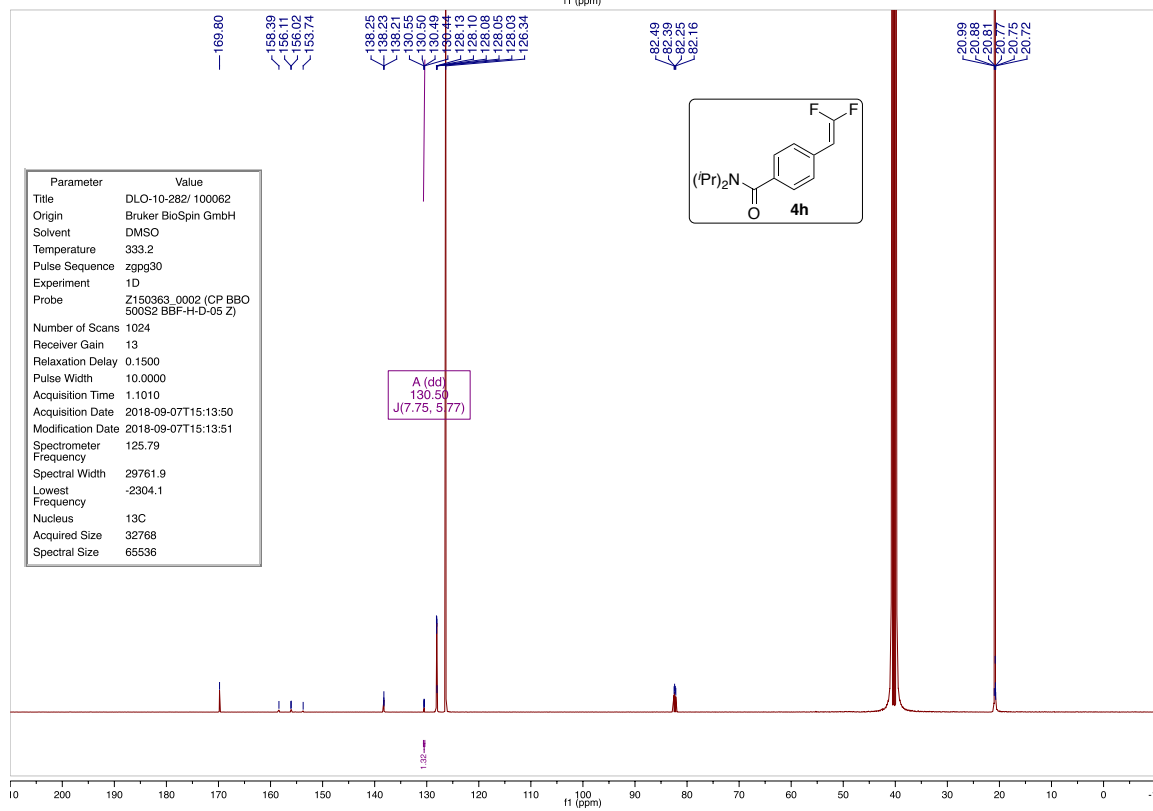

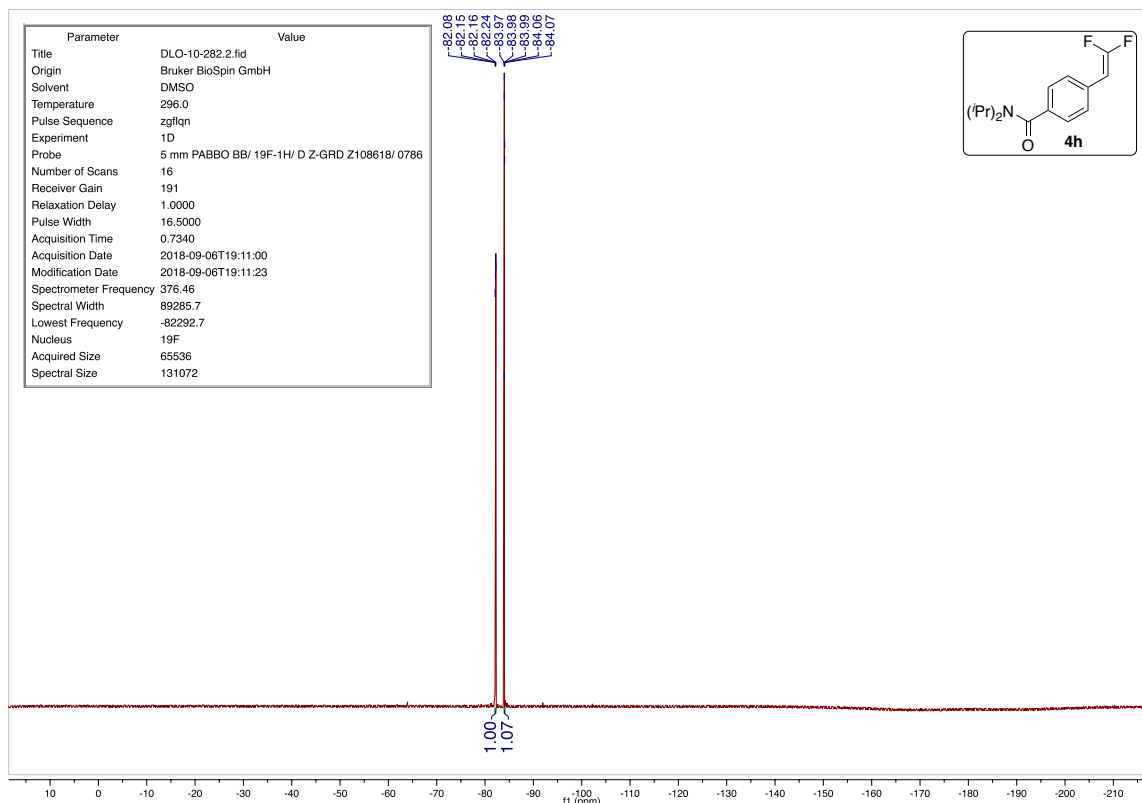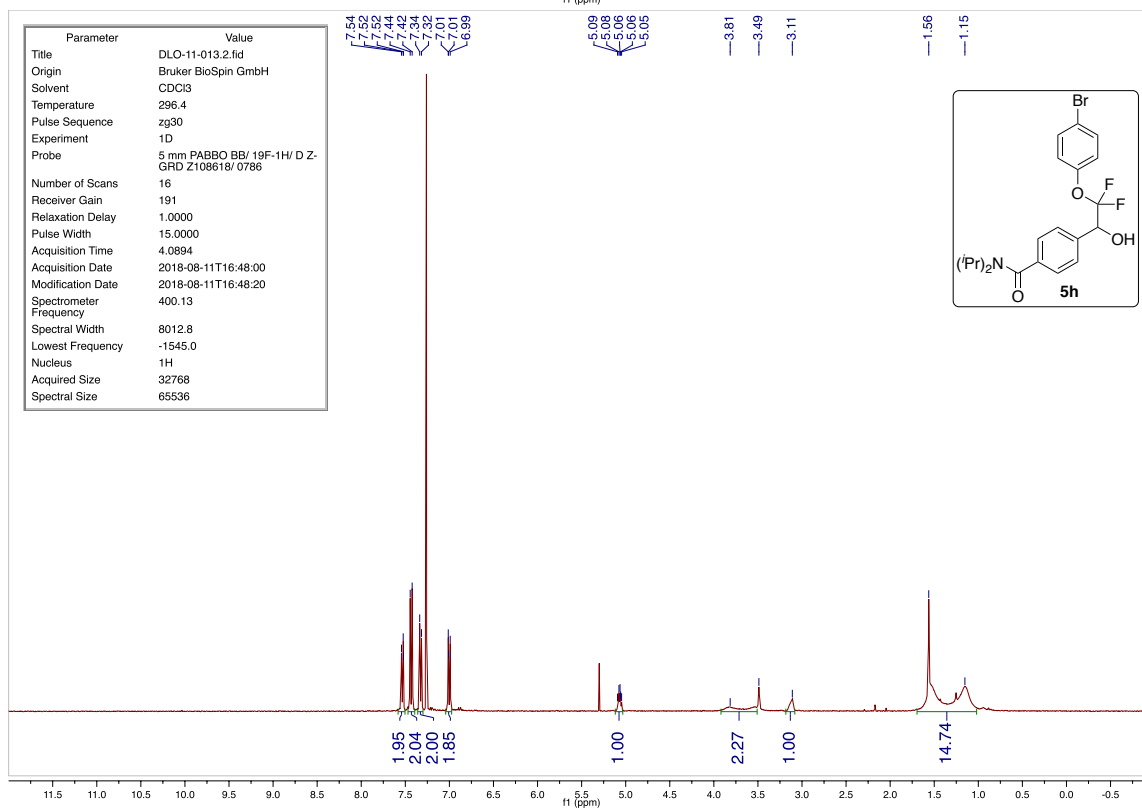

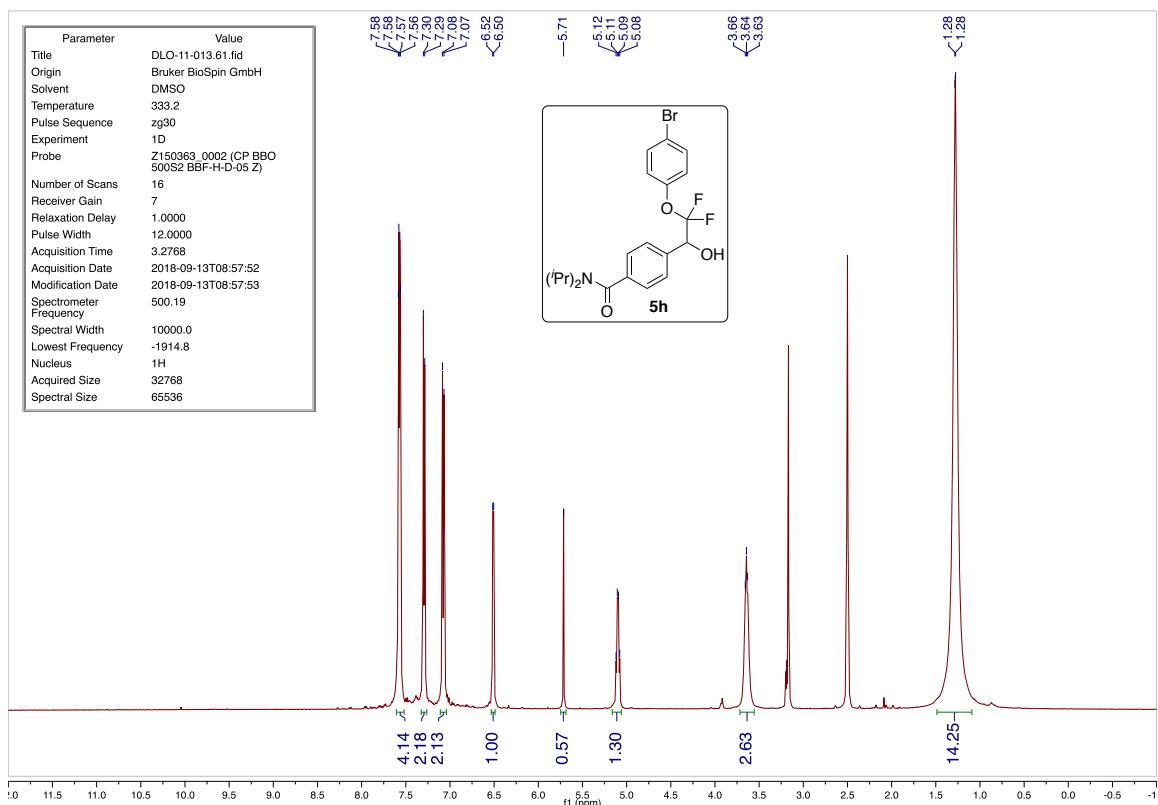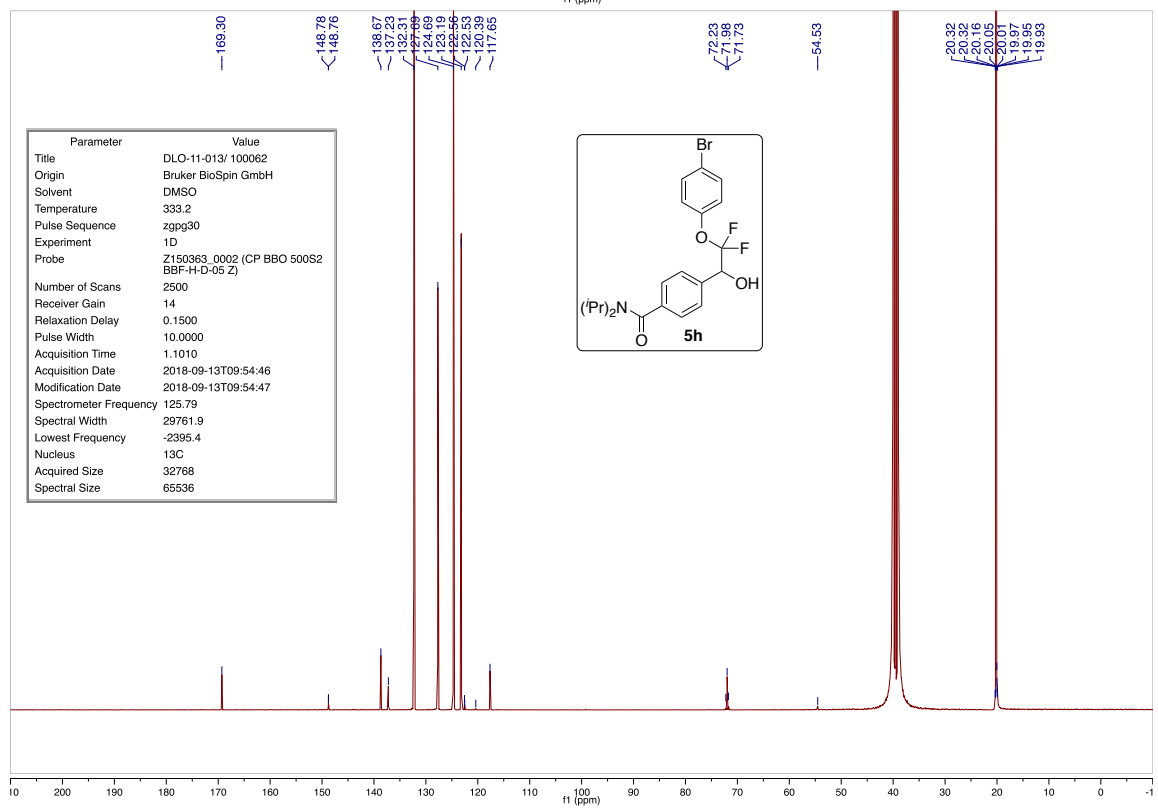

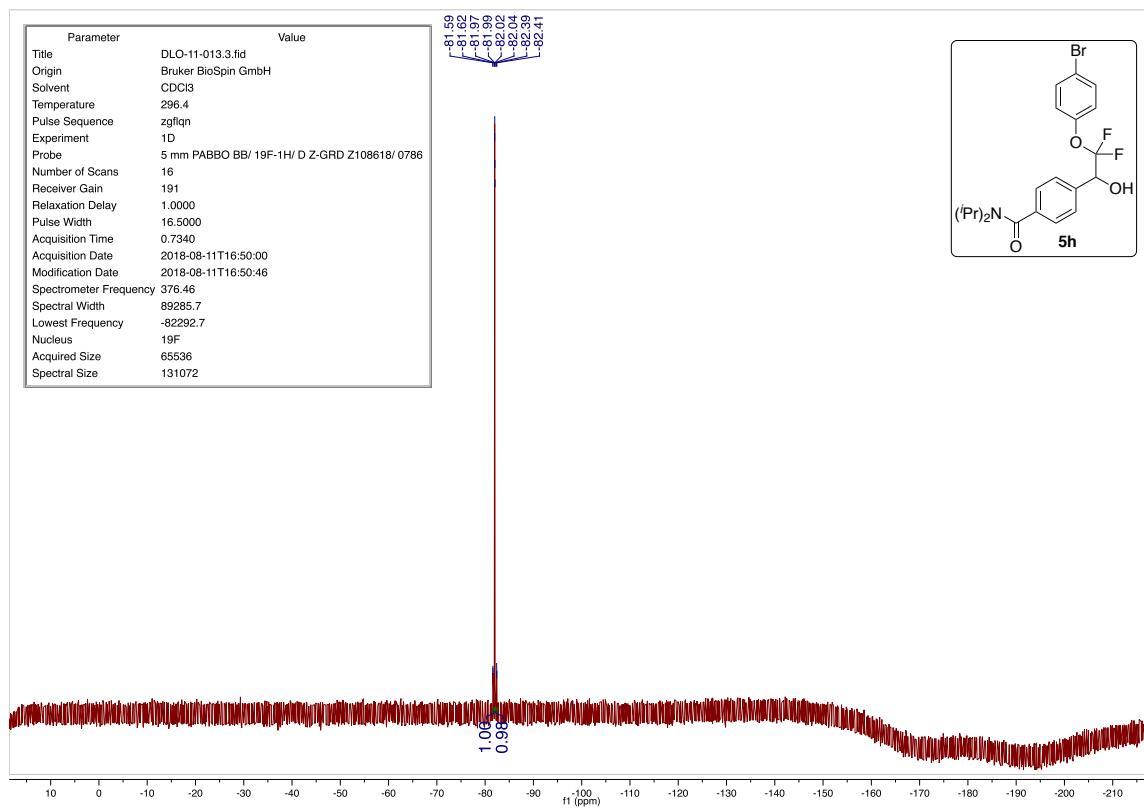

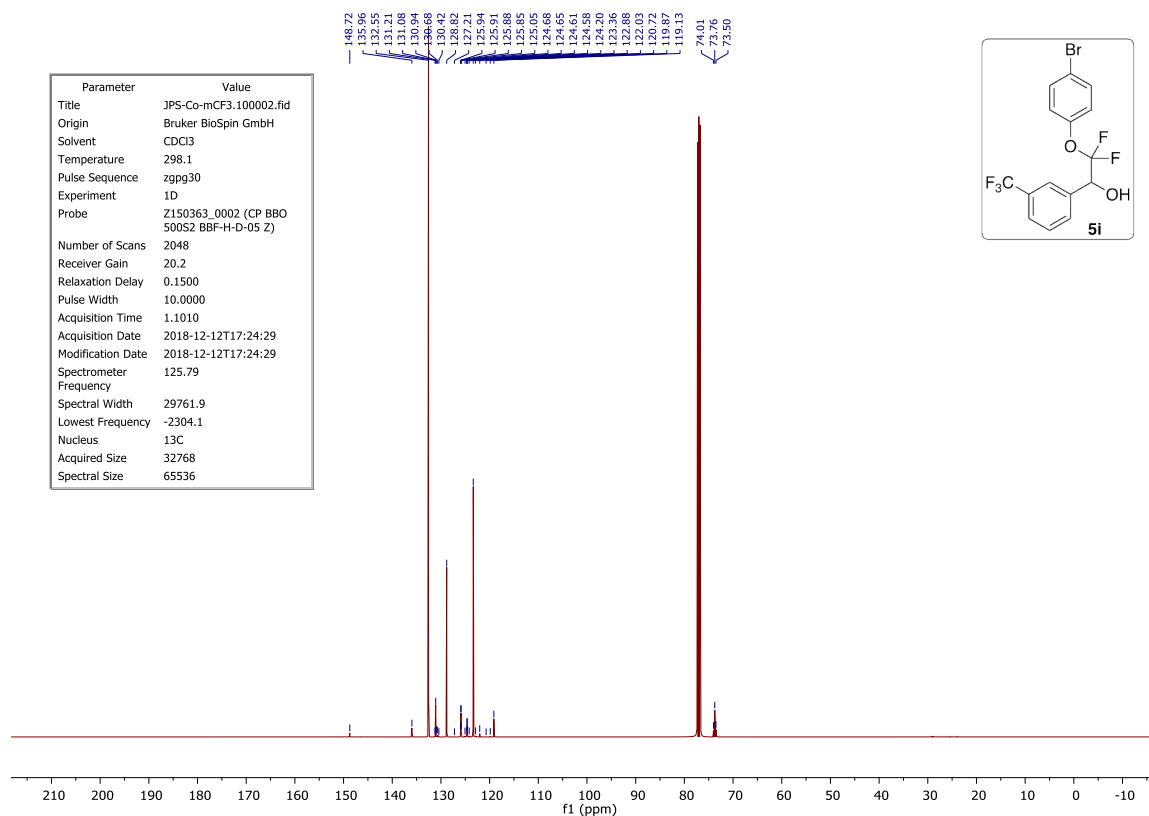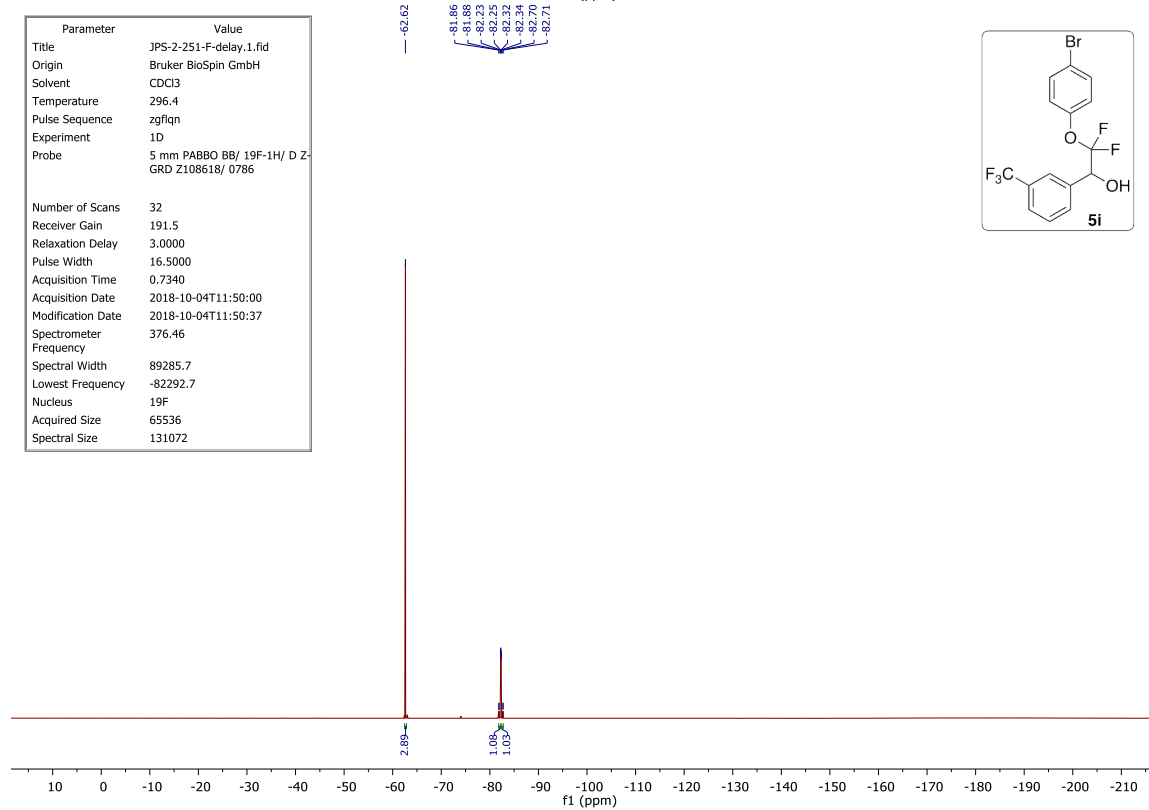

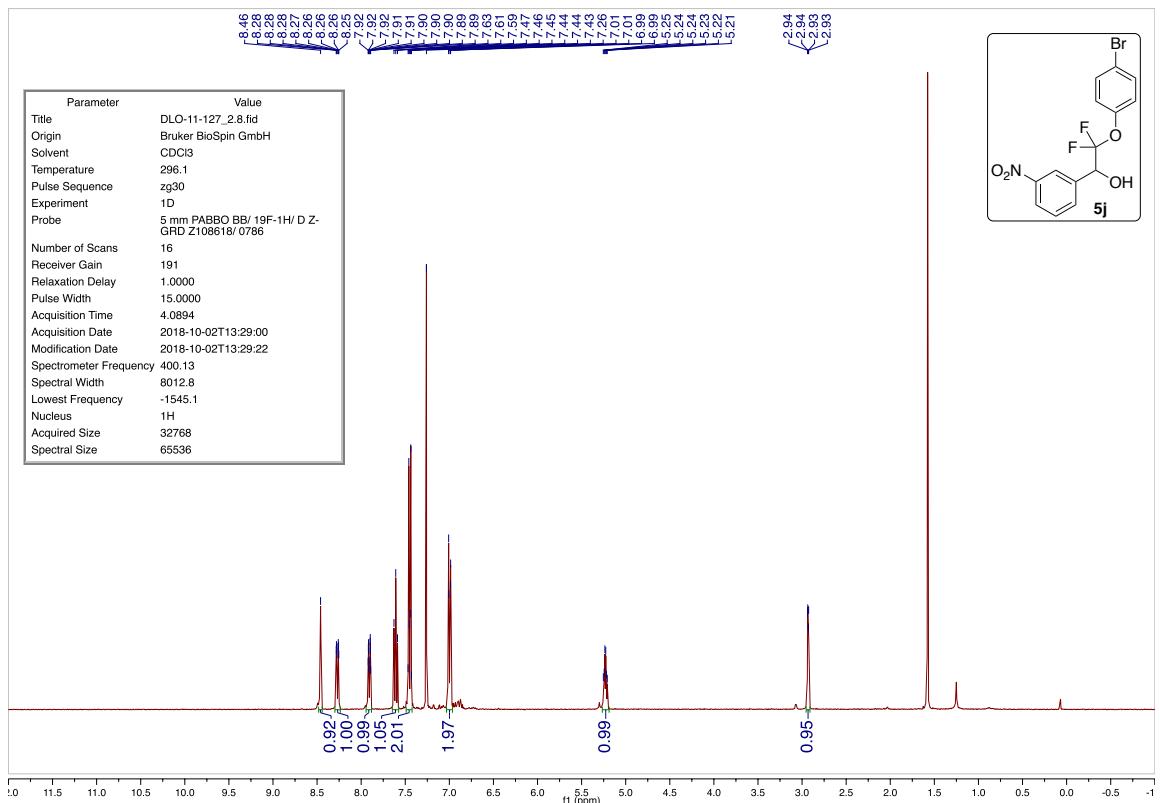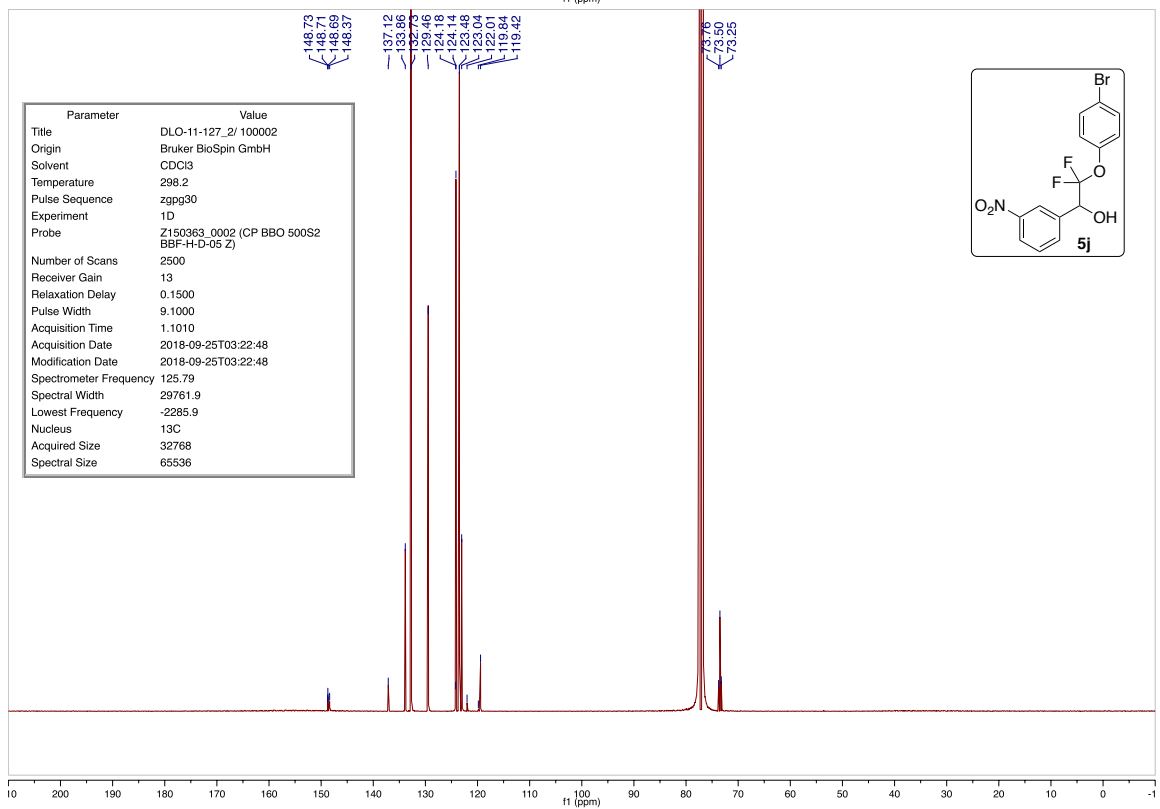



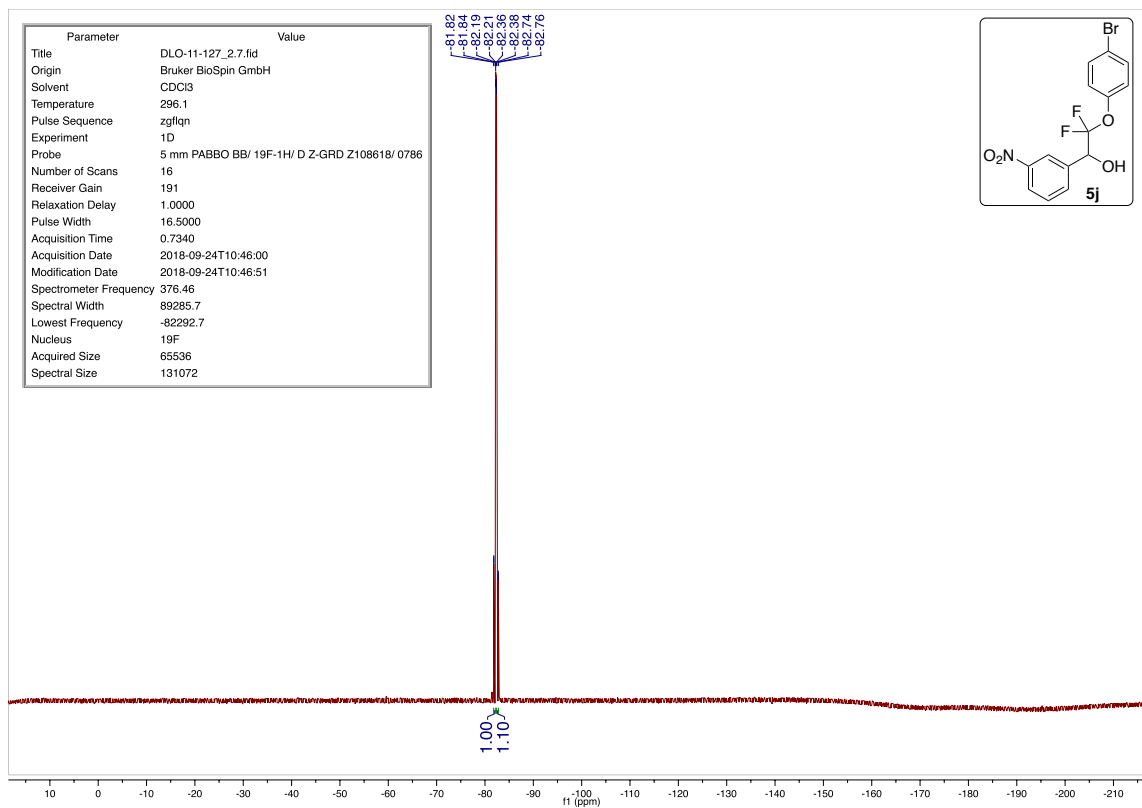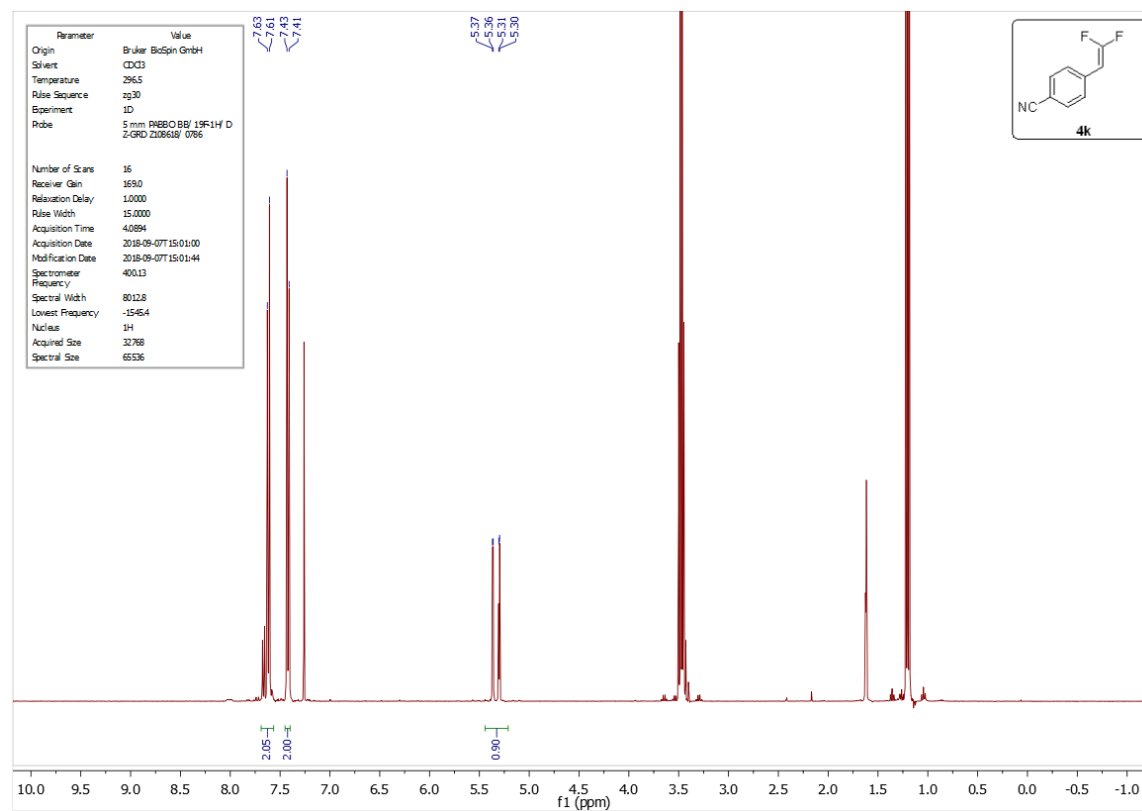

| Parameter         | Value                                        |
|-------------------|----------------------------------------------|
| Title             | JPS-2-292-F.5.fid                            |
| Origin            | Bruker BioSpin GmbH                          |
| Solvent           | CDCl3                                        |
| Temperature       | 296.2                                        |
| Pulse Sequence    | zg30                                         |
| Experiment        | 1D                                           |
| Probe             | 5 mm PABBO BB/ 19F-1H/ D Z-GRD Z108618/ 0786 |
| Number of Scans   | 16                                           |
| Receiver Gain     | 169.0                                        |
| Relaxation Delay  | 1.0000                                       |
| Pulse Width       | 15.0000                                      |
| Acquisition Time  | 4.0894                                       |
| Acquisition Date  | 2018-10-03T10:21:00                          |
| Modification Date | 2018-10-03T10:21:12                          |
| Spectrometer      | 400.13                                       |
| Frequency         |                                              |
| Spectral Width    | 8012.8                                       |
| Lowest Frequency  | -1573.7                                      |
| Nucleus           | 1H                                           |
| Acquired Size     | 32768                                        |
| Spectral Size     | 65536                                        |

7.65  
7.65  
7.63  
7.62  
7.61  
7.60  
7.58  
7.38  
7.36  
6.92  
6.92  
6.91  
6.90  
6.90  
6.89  
5.12  
5.11  
5.10  
5.09  
5.08  
5.07  
2.91  
2.90

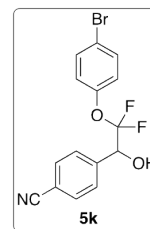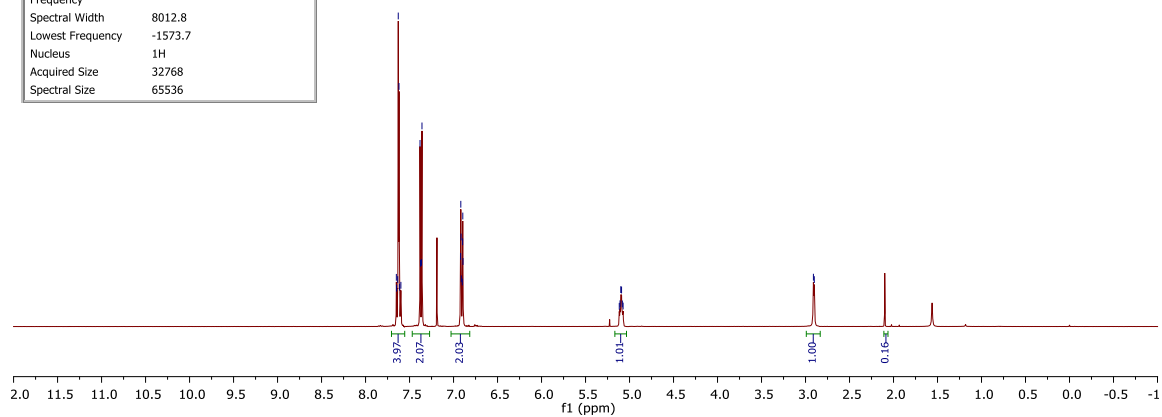

| Parameter         | Value                                    |
|-------------------|------------------------------------------|
| Title             | JPS-2-292-F.100002.fid                   |
| Origin            | Bruker BioSpin GmbH                      |
| Solvent           | CDCl3                                    |
| Temperature       | 298.2                                    |
| Pulse Sequence    | zpgg30                                   |
| Experiment        | 1D                                       |
| Probe             | Z150363_0002 (CP BBO 50052 BBF-H-D-05 Z) |
| Number of Scans   | 2048                                     |
| Receiver Gain     | 20.2                                     |
| Relaxation Delay  | 0.1500                                   |
| Pulse Width       | 9.1000                                   |
| Acquisition Time  | 1.1010                                   |
| Acquisition Date  | 2018-10-03T15:31:47                      |
| Modification Date | 2018-10-03T15:31:47                      |
| Spectrometer      | 125.79                                   |
| Frequency         |                                          |
| Spectral Width    | 29761.9                                  |
| Lowest Frequency  | -2304.1                                  |
| Nucleus           | 13C                                      |
| Acquired Size     | 32768                                    |
| Spectral Size     | 65536                                    |

148.60  
140.05  
132.89  
128.49  
128.49  
124.06  
123.37  
121.89  
119.76  
118.47  
112.92  
73.86  
73.71  
73.36

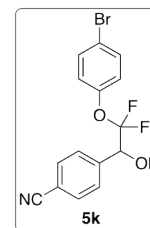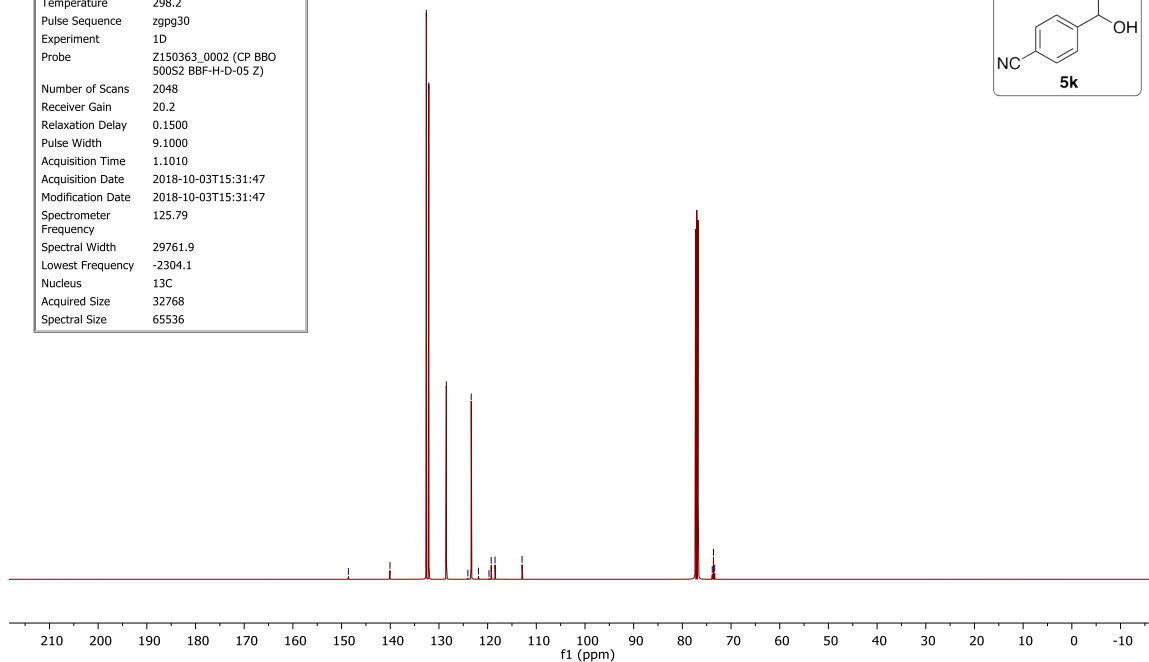

| Parameter         | Value                                        |
|-------------------|----------------------------------------------|
| Title             | JPS-2-292-F.7.fid                            |
| Origin            | Bruker BioSpin GmbH                          |
| Solvent           | CDCl3                                        |
| Temperature       | 296.2                                        |
| Pulse Sequence    | zgfgq                                        |
| Experiment        | 1D                                           |
| Probe             | 5 mm PABBO BB/ 19F-1H/ D Z-GRD Z108618/ 0786 |
| Number of Scans   | 24                                           |
| Receiver Gain     | 191.5                                        |
| Relaxation Delay  | 1.0000                                       |
| Pulse Width       | 16.5000                                      |
| Acquisition Time  | 0.7340                                       |
| Acquisition Date  | 2018-10-03T10:23:00                          |
| Modification Date | 2018-10-03T10:23:49                          |
| Spectrometer      | 376.46                                       |
| Frequency         |                                              |
| Spectral Width    | 89285.7                                      |
| Lowest Frequency  | -82292.7                                     |
| Nucleus           | 19F                                          |
| Acquired Size     | 65536                                        |
| Spectral Size     | 131072                                       |

81.55  
81.57  
81.59  
81.61  
81.63  
82.13  
82.14  
82.50

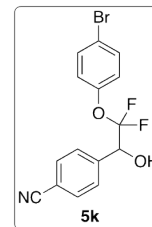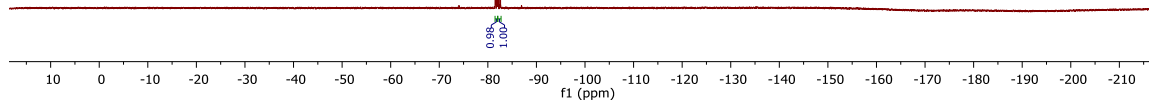

| Parameter              | Value                                       |
|------------------------|---------------------------------------------|
| Origin                 | UKNMR, Bruker Analytische Messtechnik GmbH  |
| Solvent                | CDCl3                                       |
| Temperature            | 301.7                                       |
| Pulse Sequence         | zg30                                        |
| Experiment             | 1D                                          |
| Probe                  | 5 mm PABBO BB/ 19F-1H/ D Z-GRD Z10902/ 0011 |
| Number of Scans        | 16                                          |
| Receiver Gain          | 574.7                                       |
| Relaxation Delay       | 1.0000                                      |
| Pulse Width            | 15.2000                                     |
| Acquisition Time       | 3.1719                                      |
| Acquisition Date       | 2019-04-02T14:58:37                         |
| Modification Date      | 2019-04-02T14:58:40                         |
| Spectrometer Frequency | 500.13                                      |
| Spectral Width         | 10330.6                                     |
| Lowest Frequency       | -2089.8                                     |
| Nucleus                | 1H                                          |
| Acquired Size          | 32788                                       |
| Spectral Size          | 65536                                       |

7.26  
7.24  
7.24  
7.24  
7.21

5.24  
5.23  
5.19  
5.18

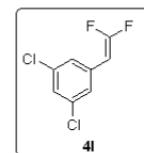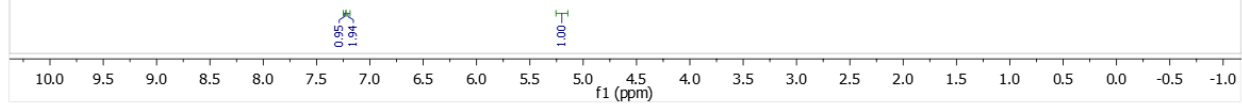

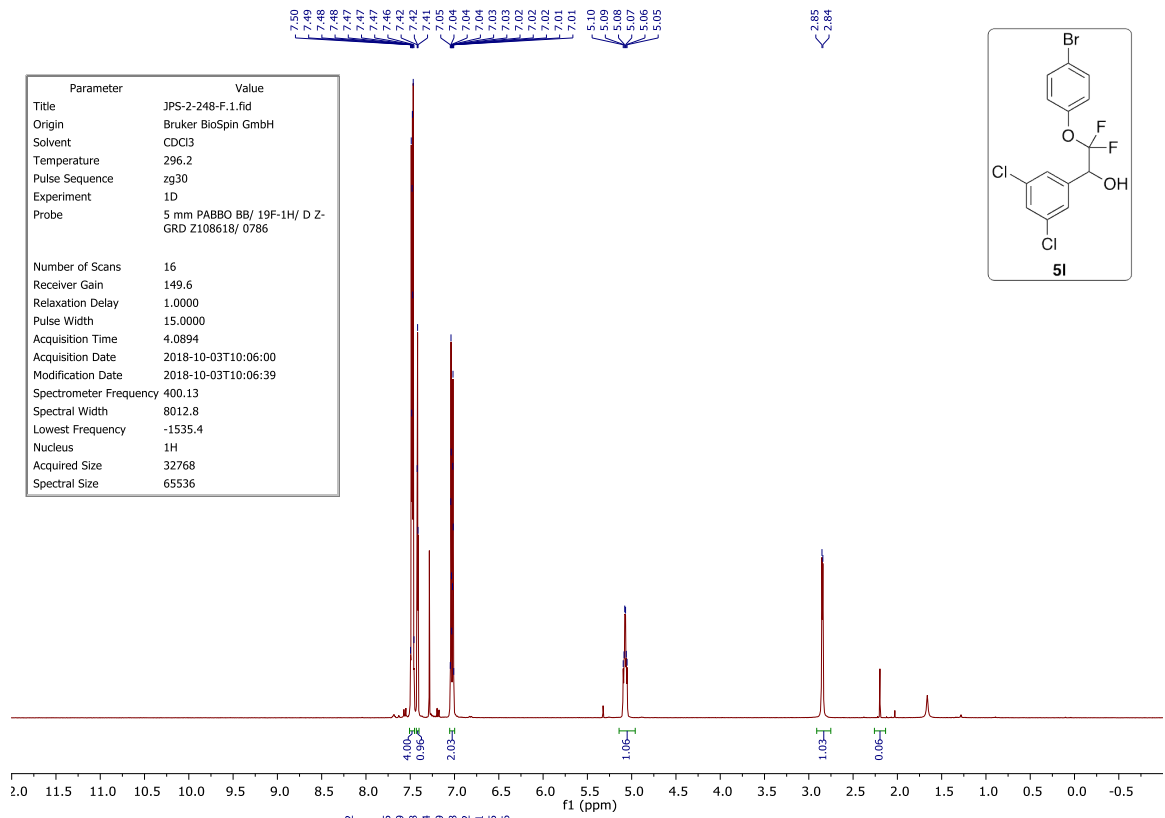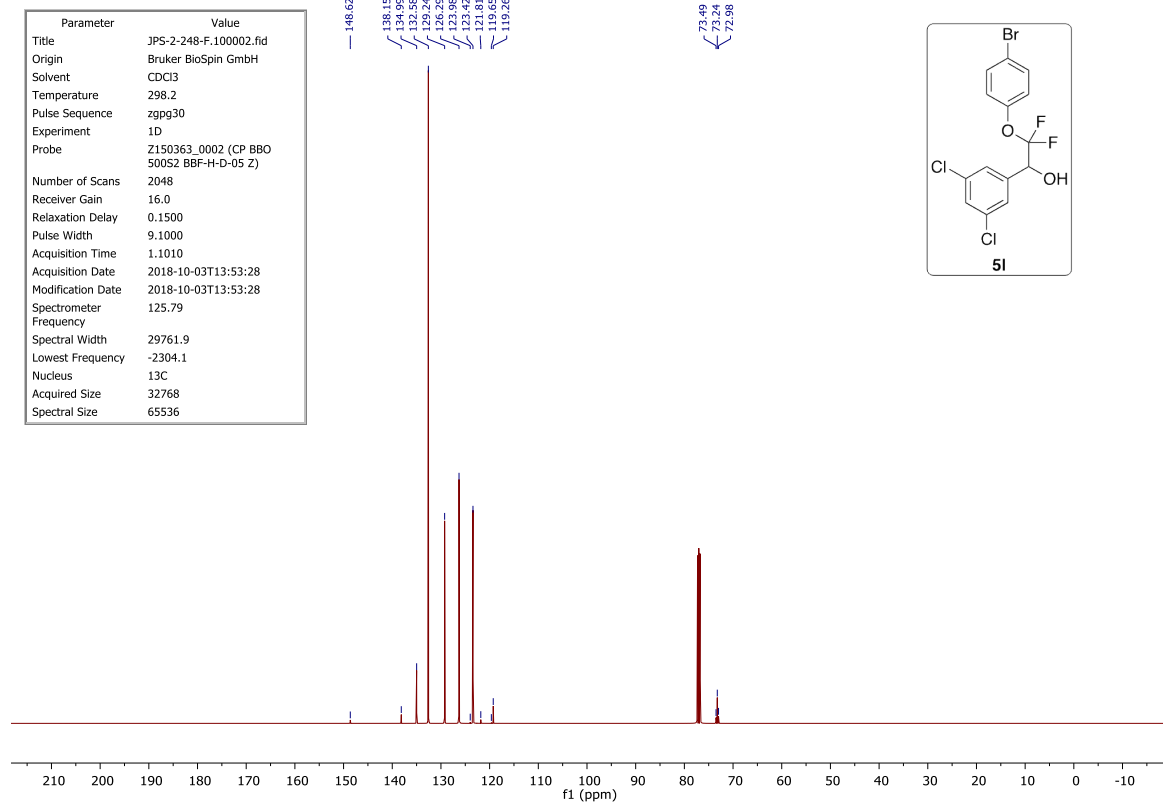

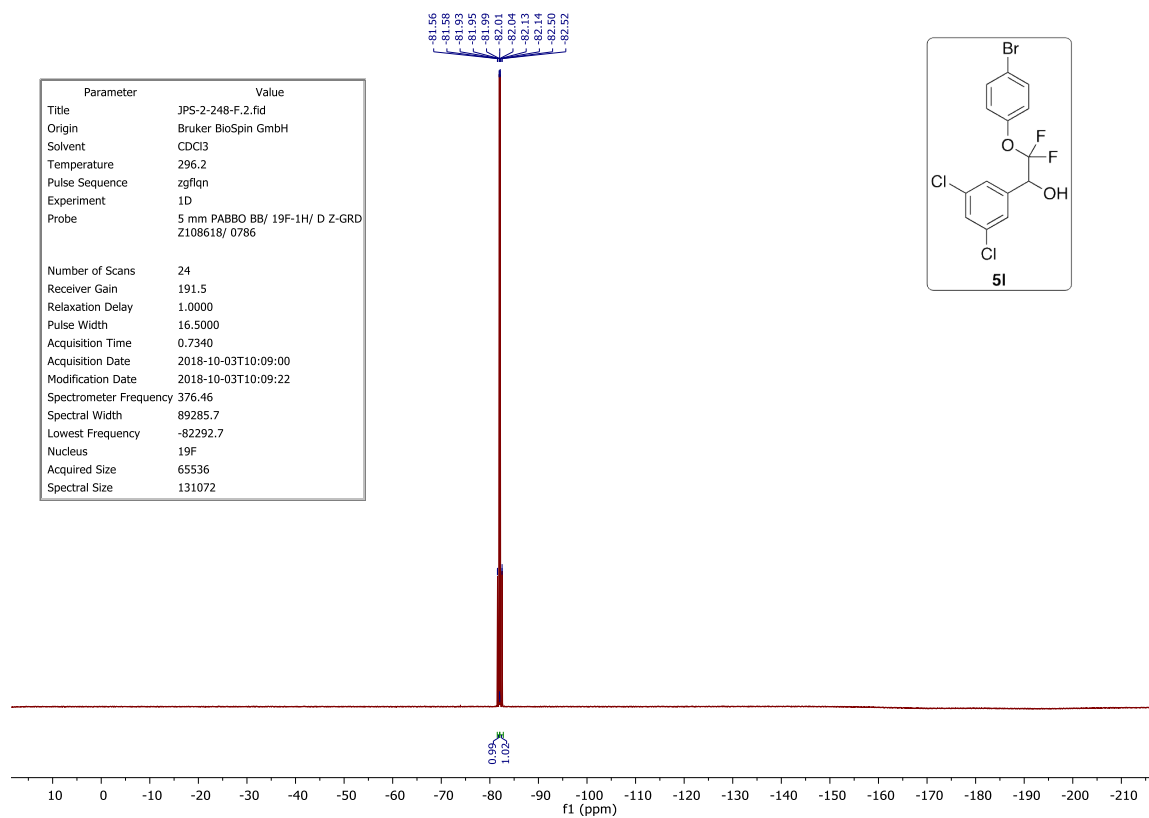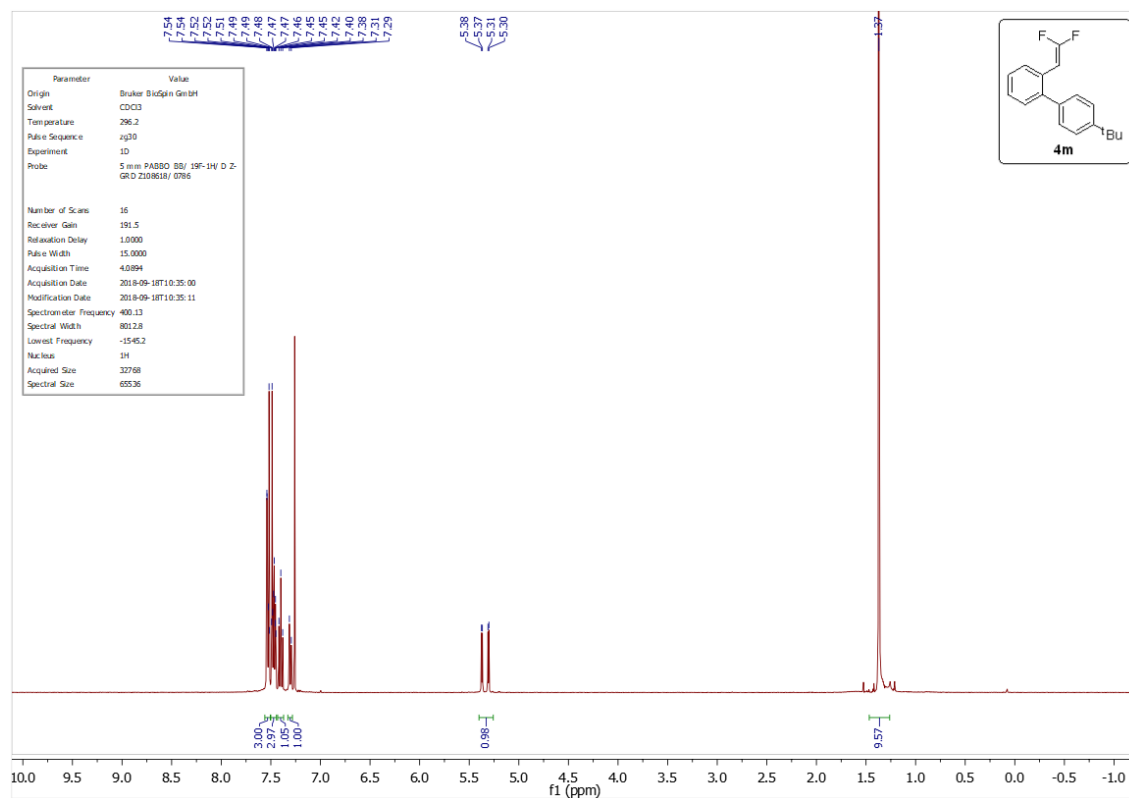

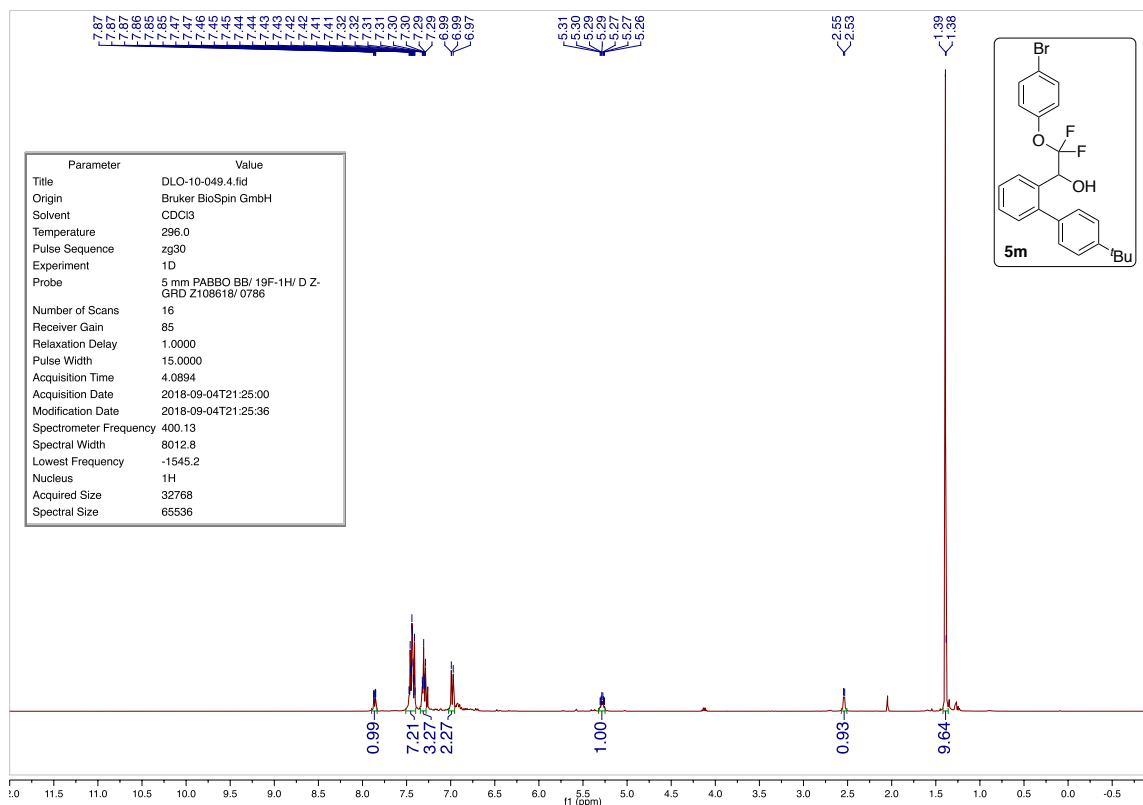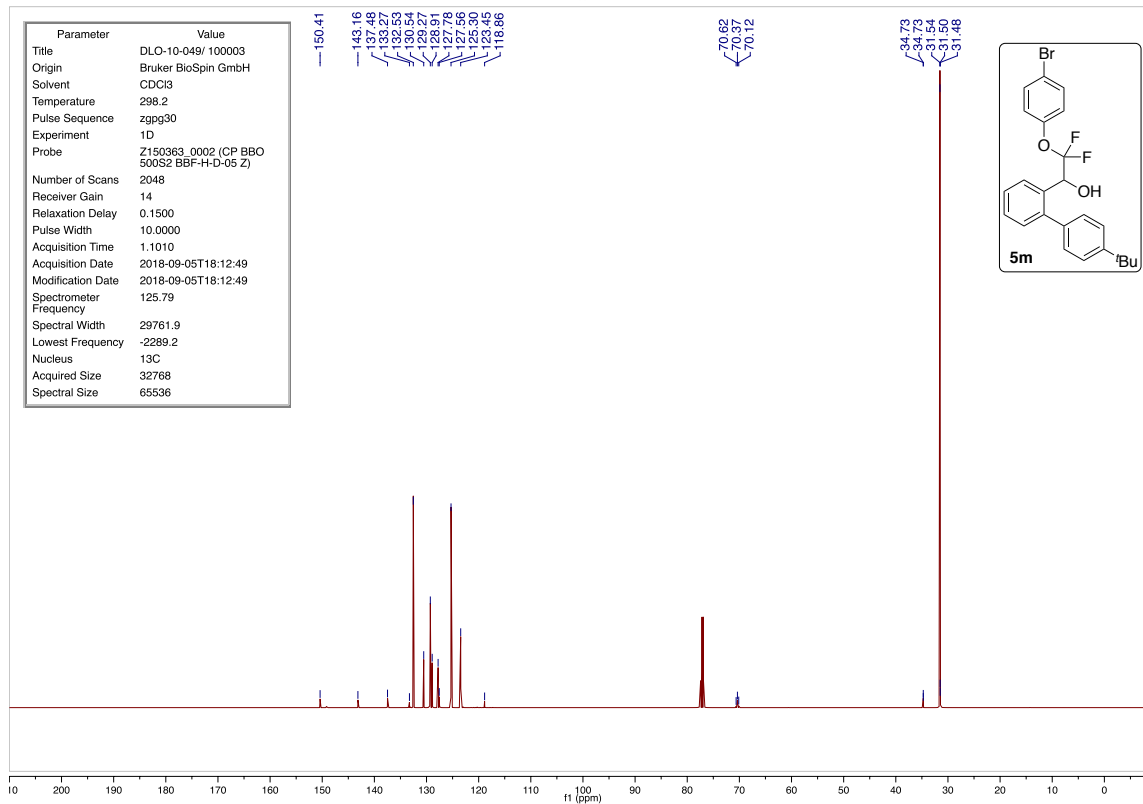

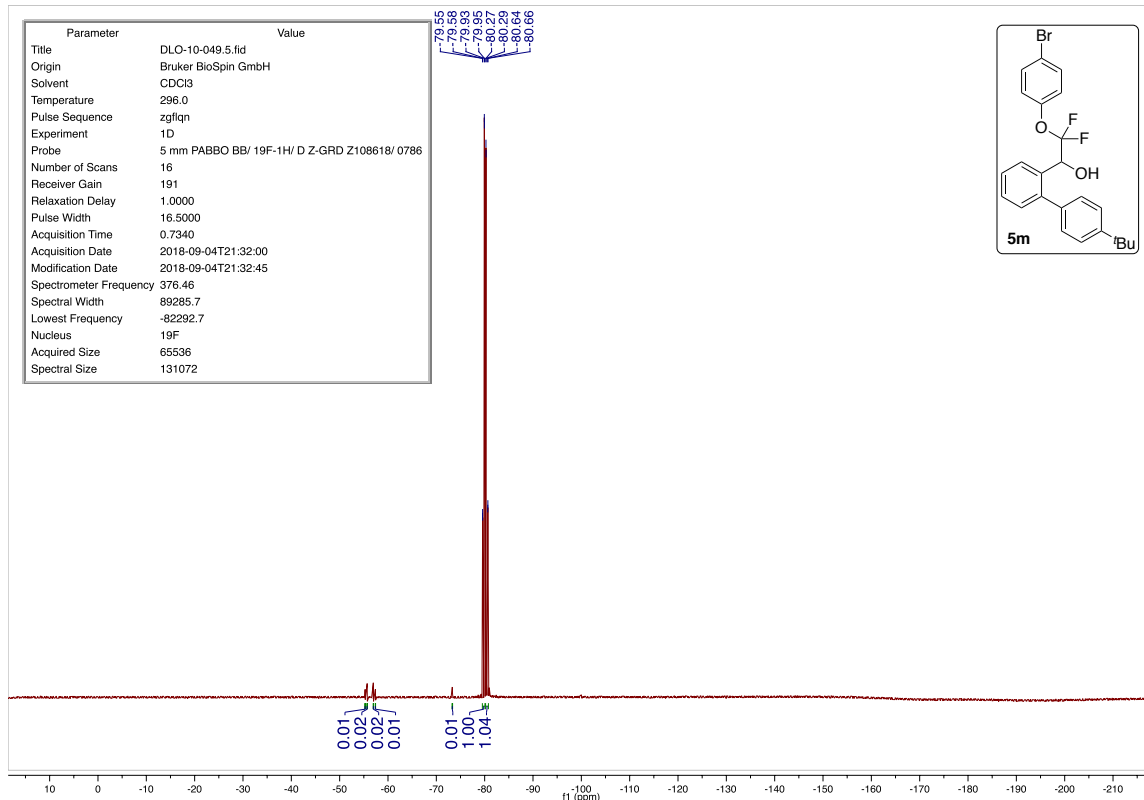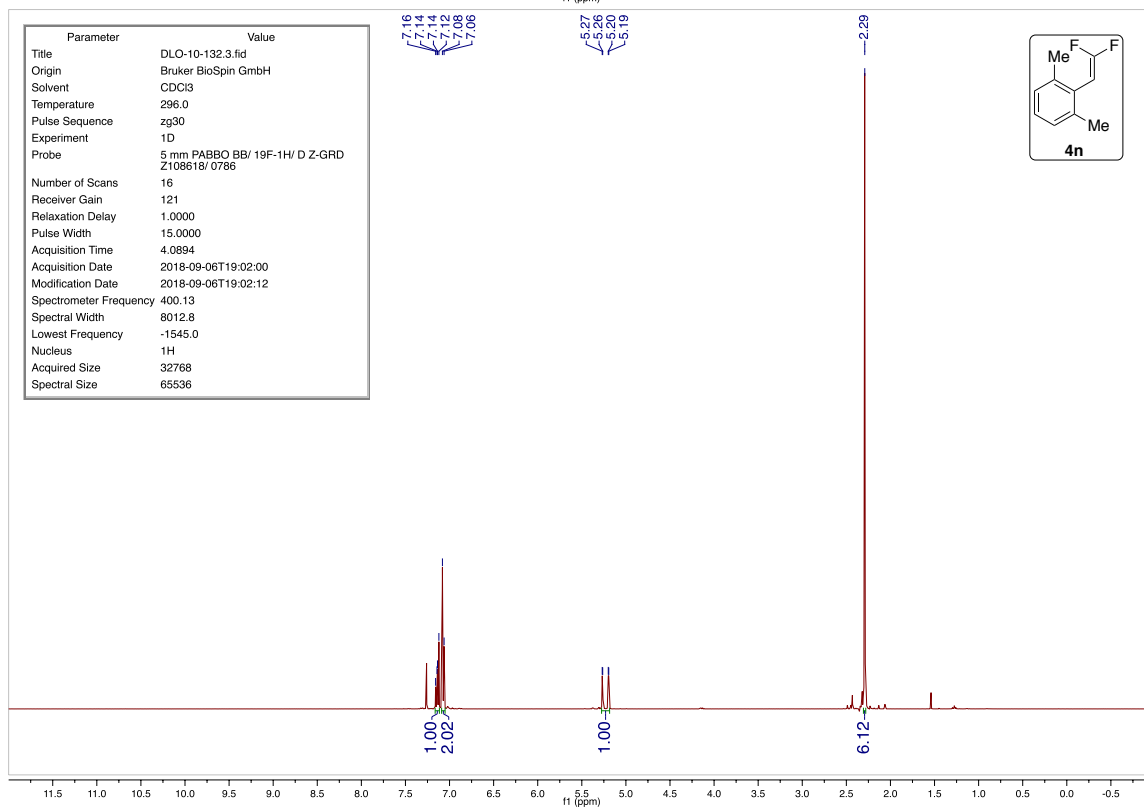

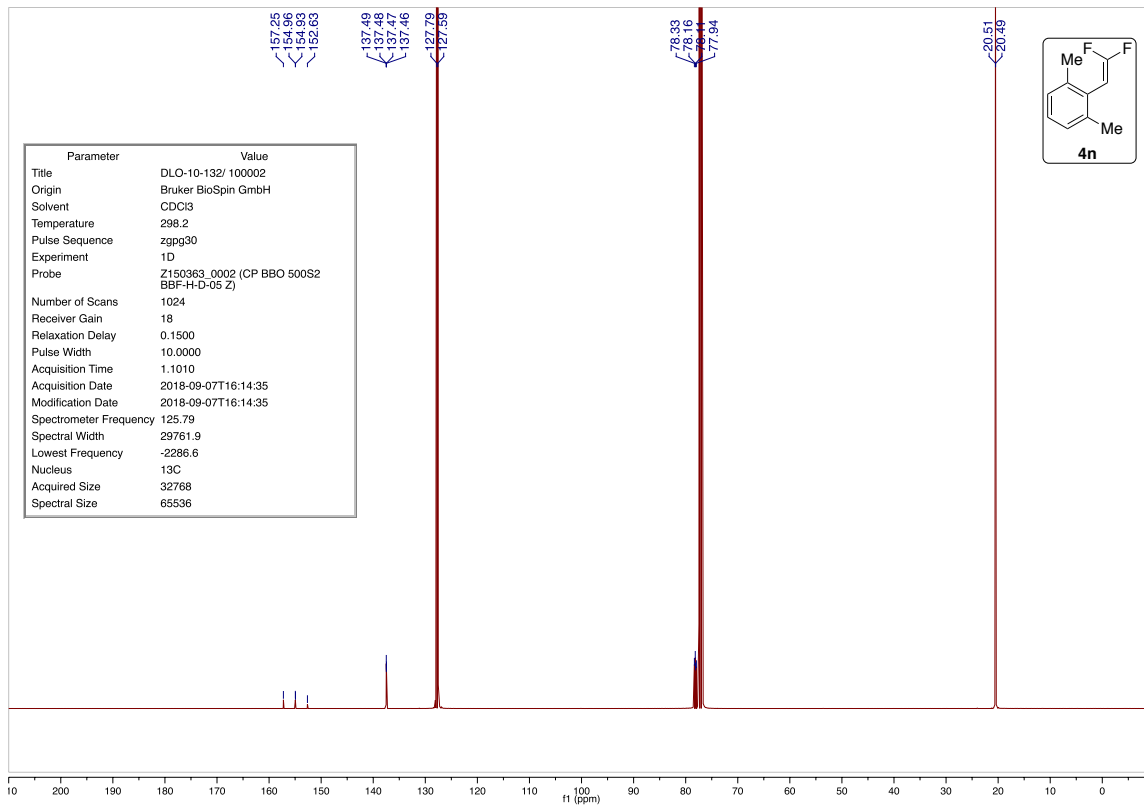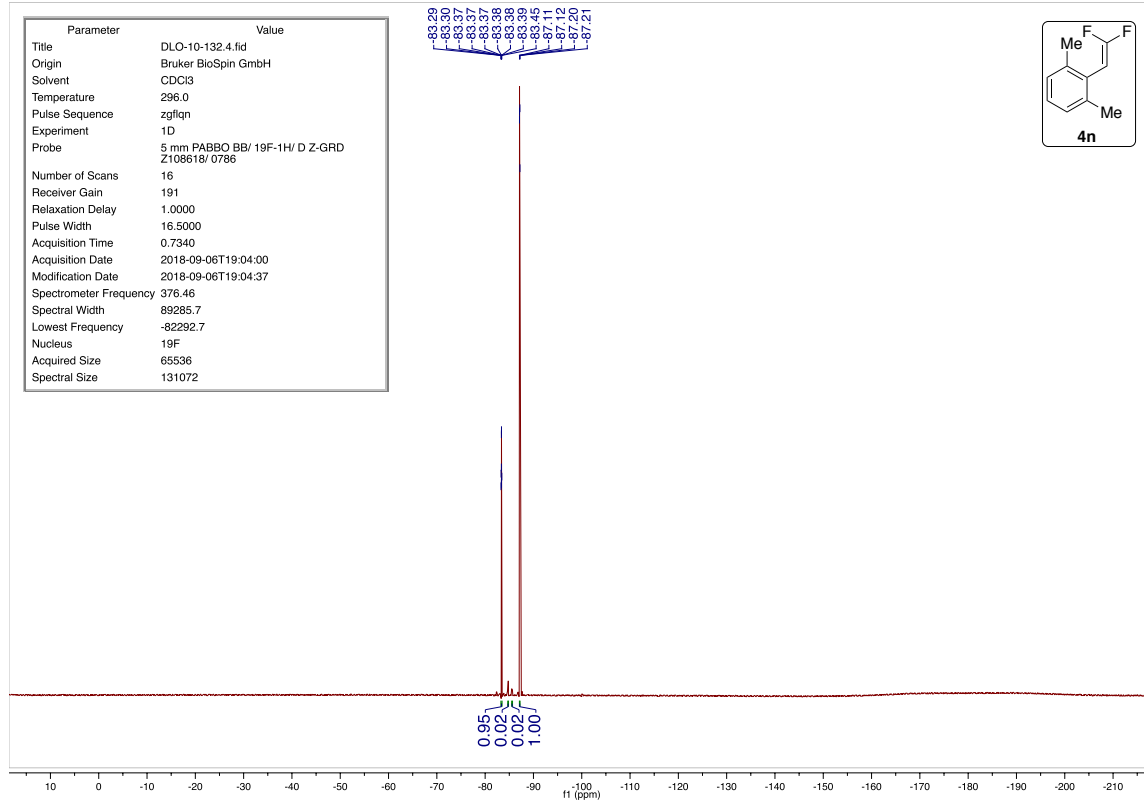



### NMR Spectra of Compounds in Table 3:

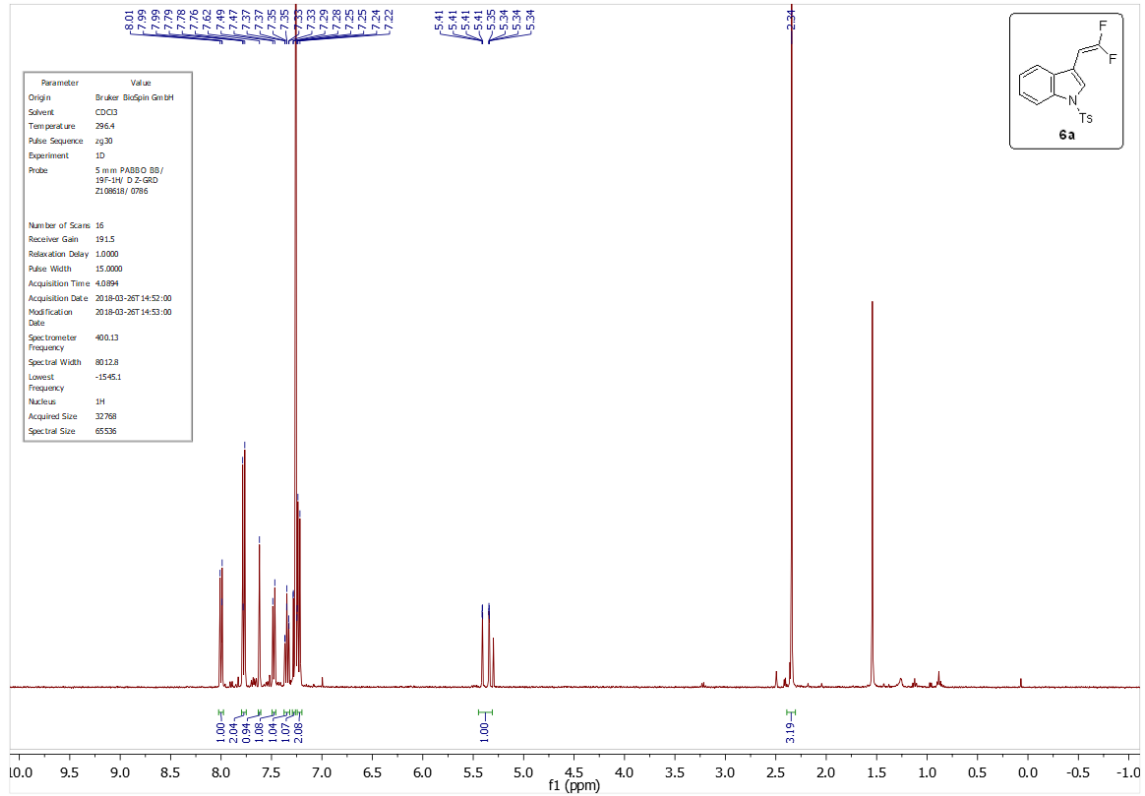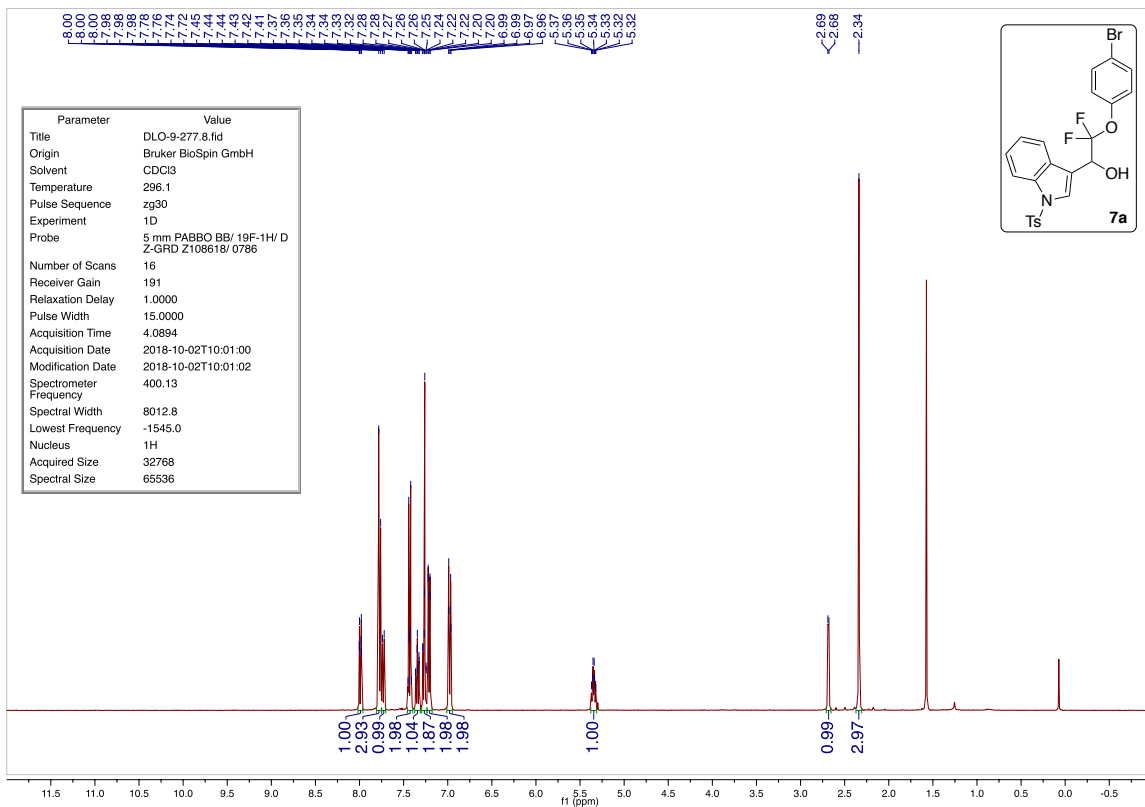

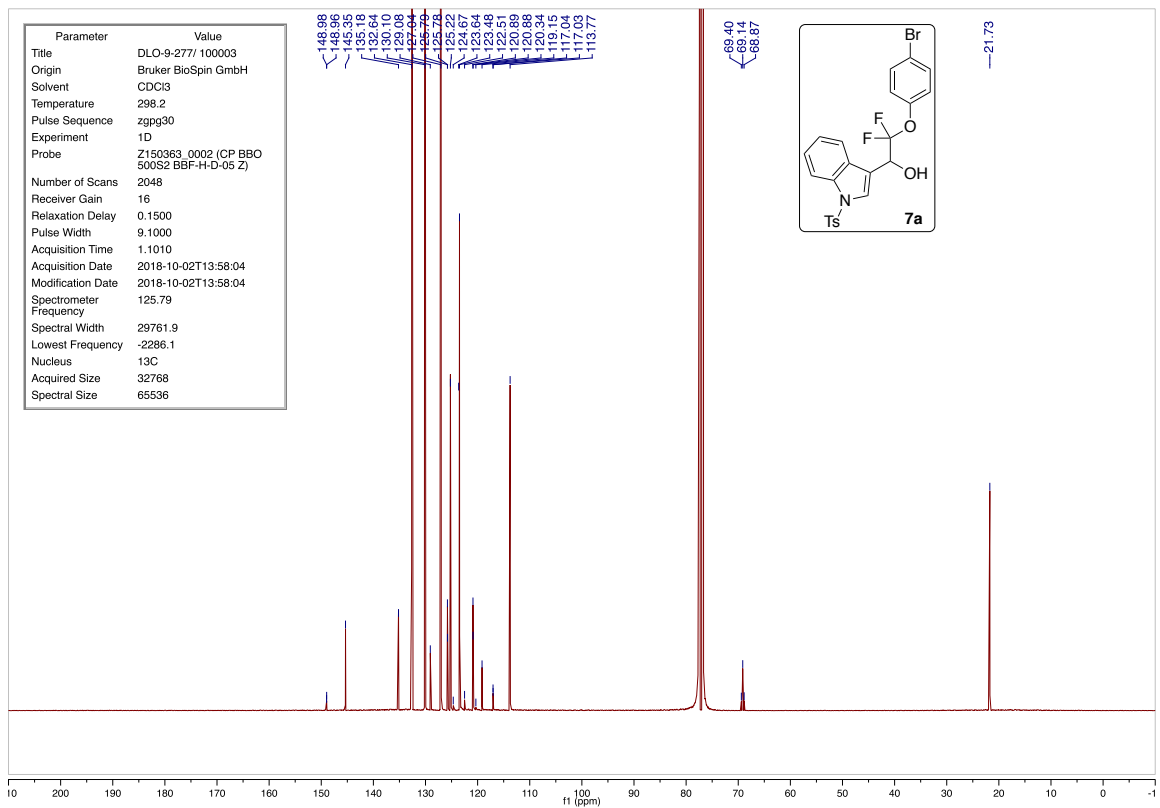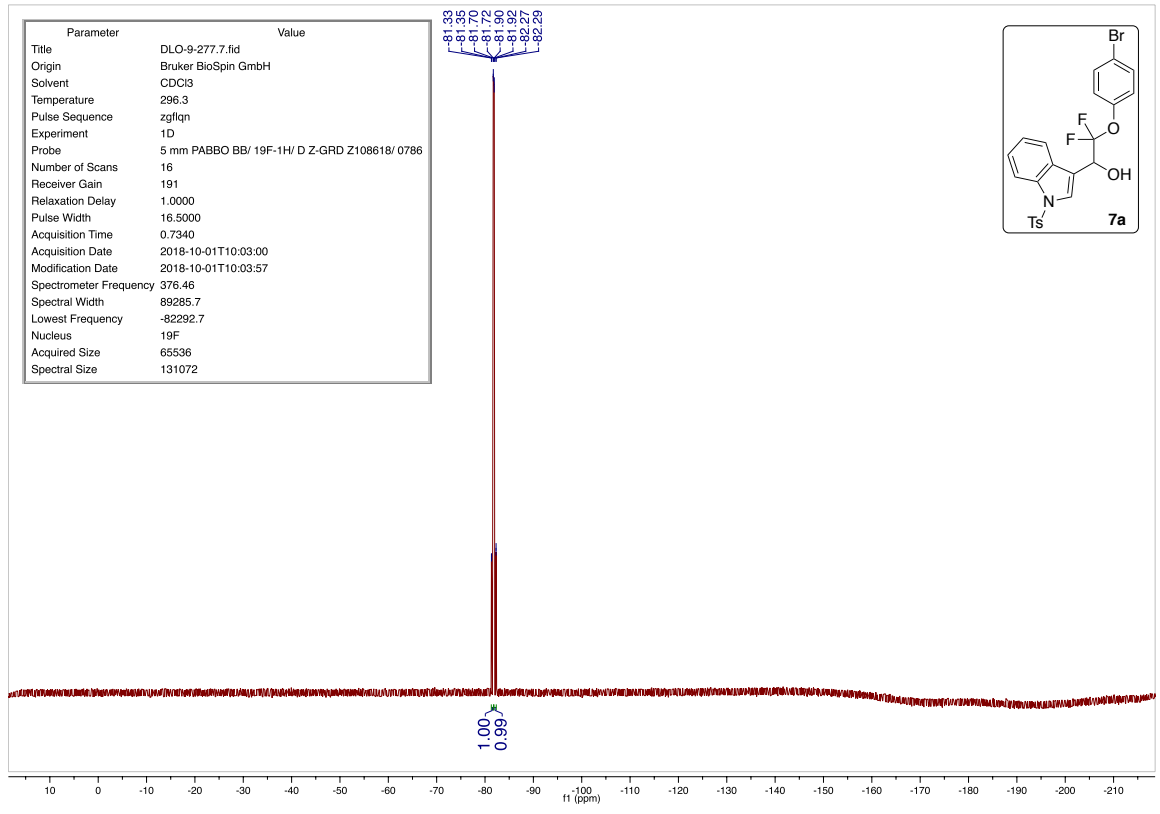

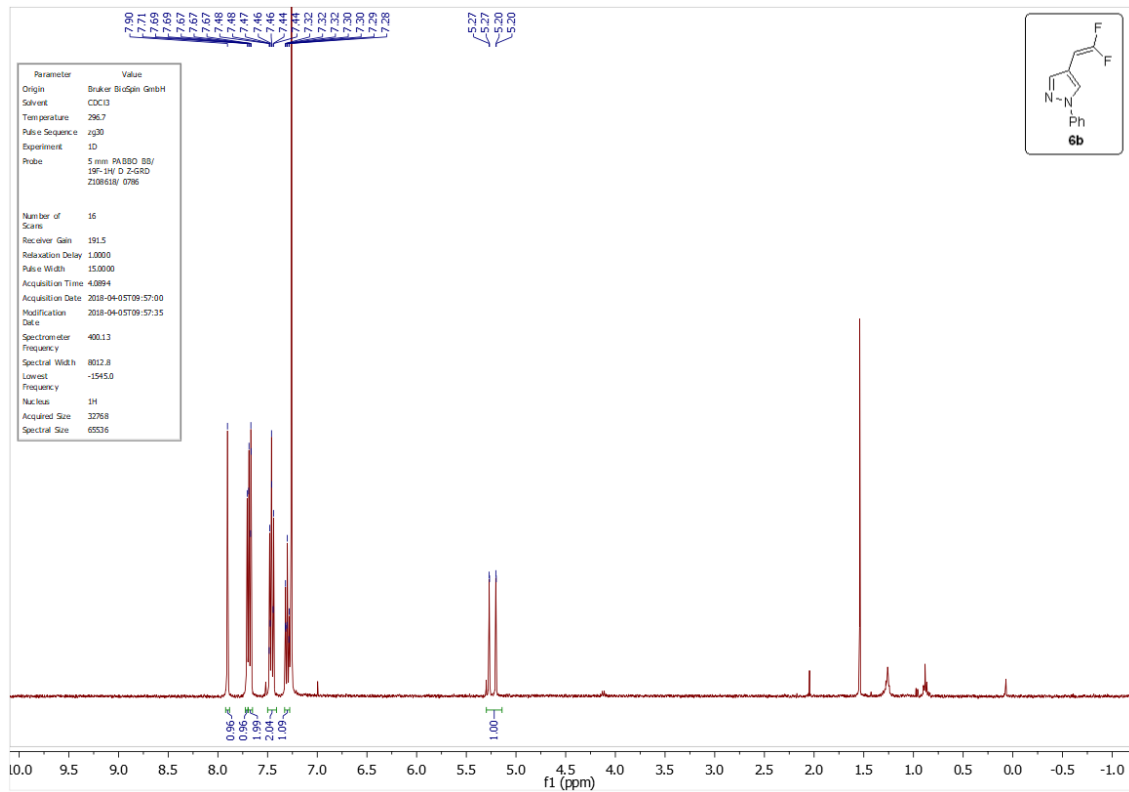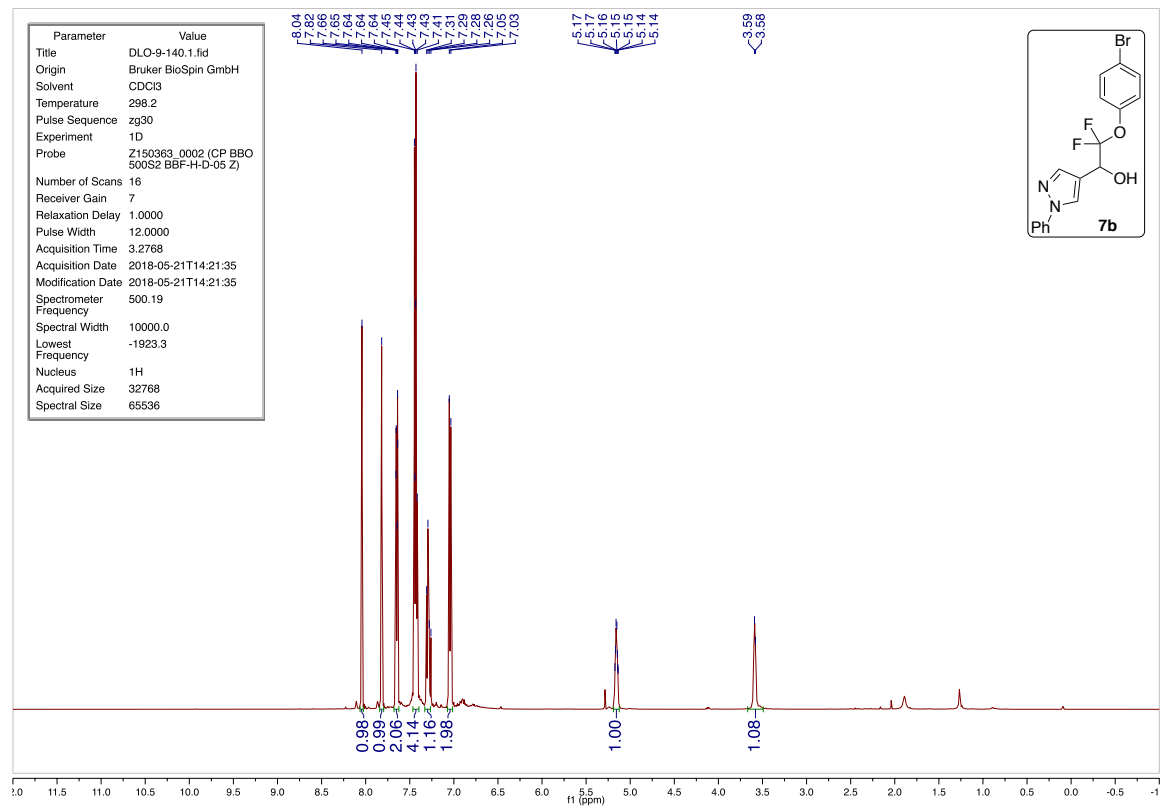

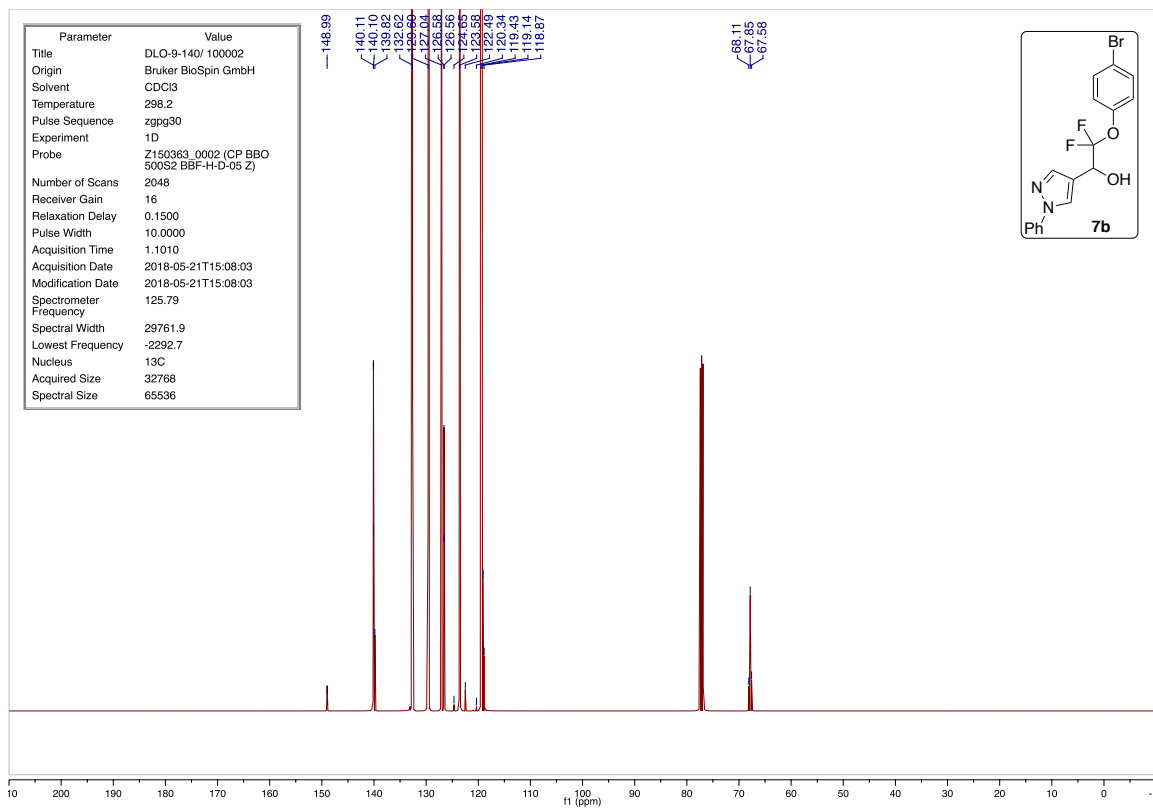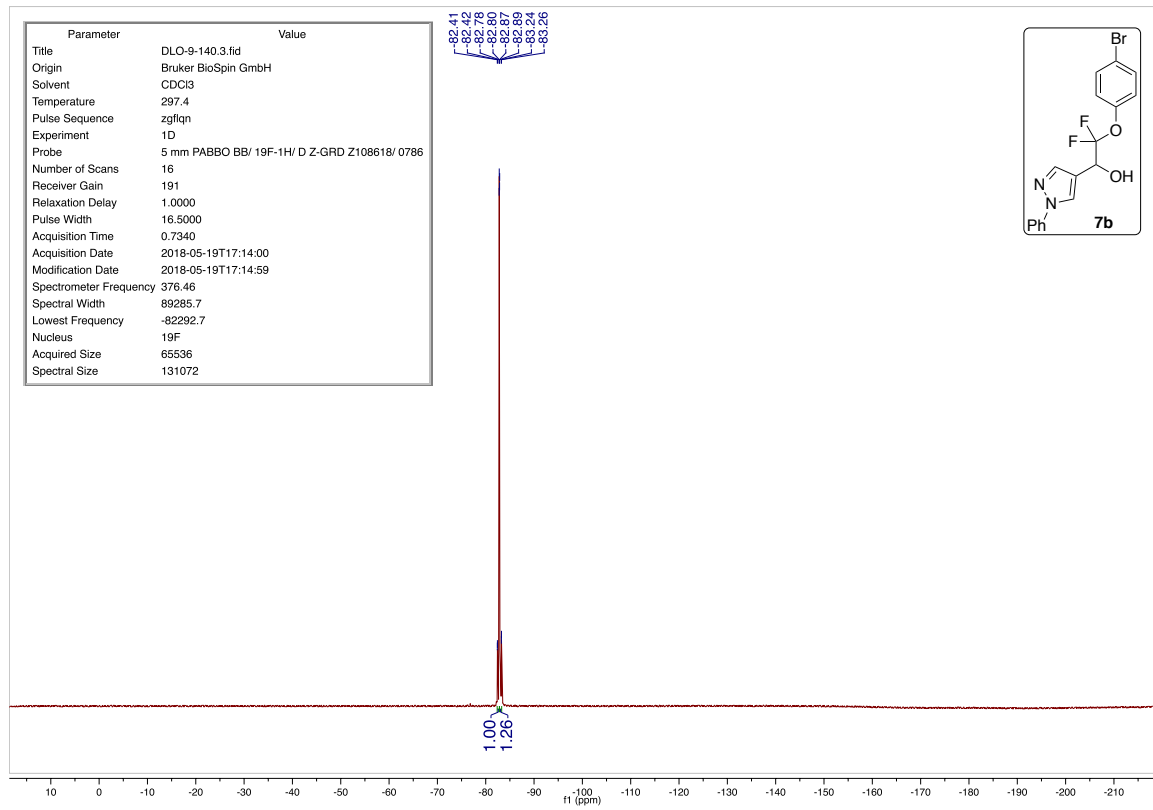

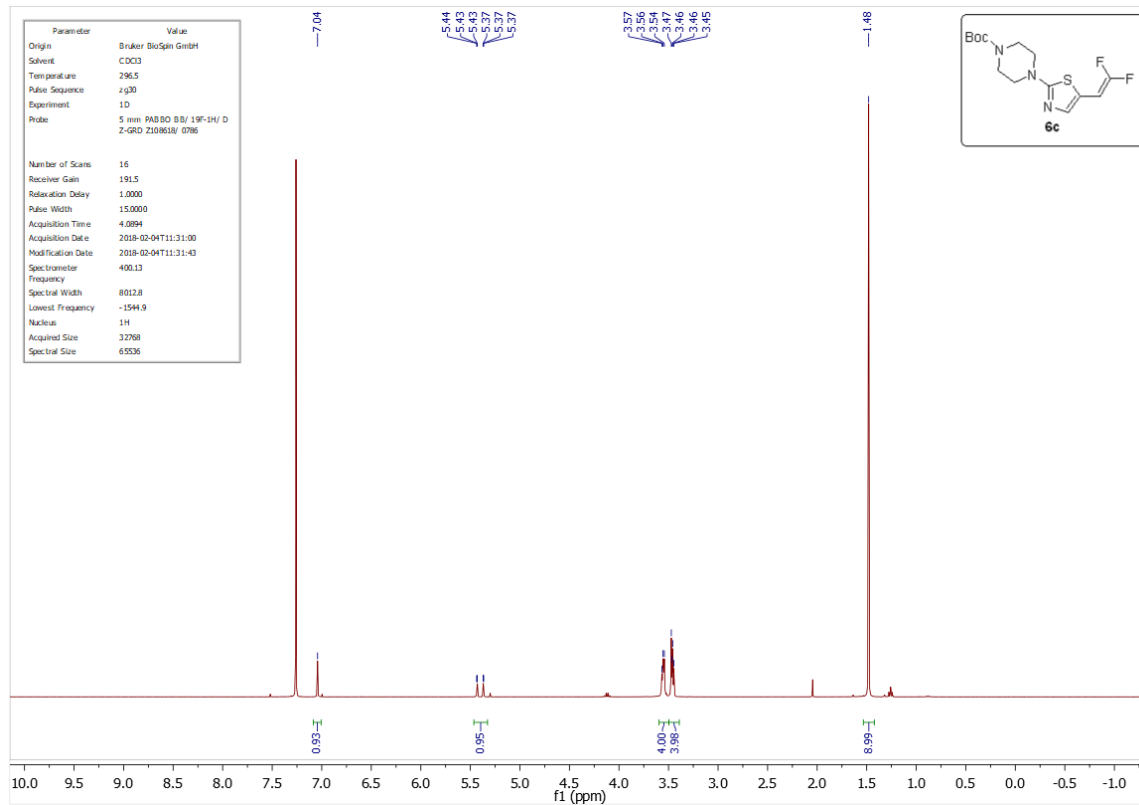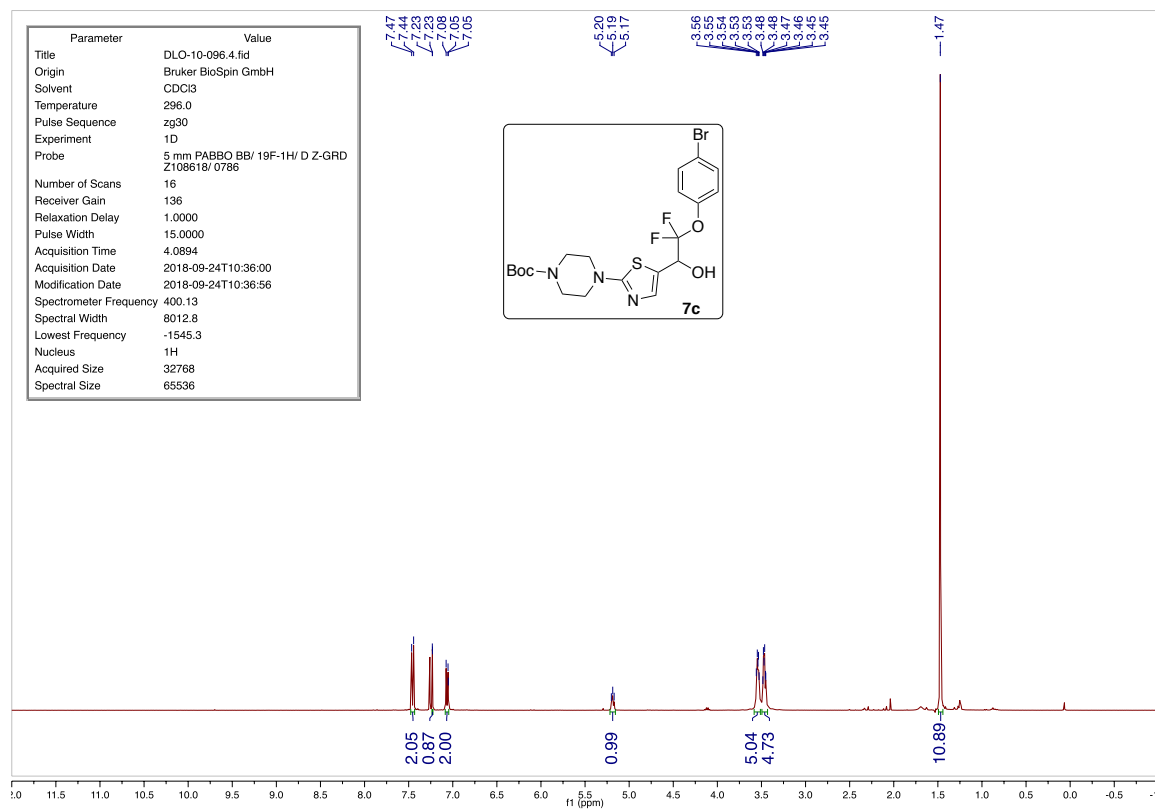

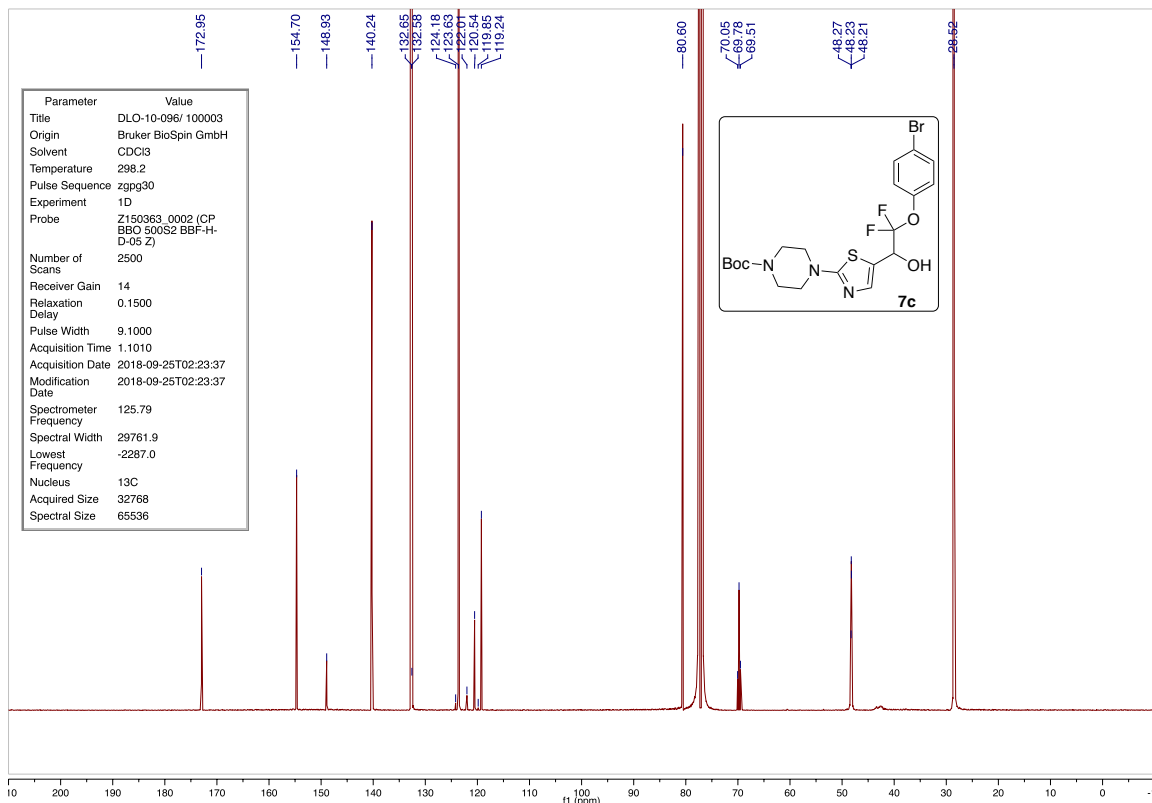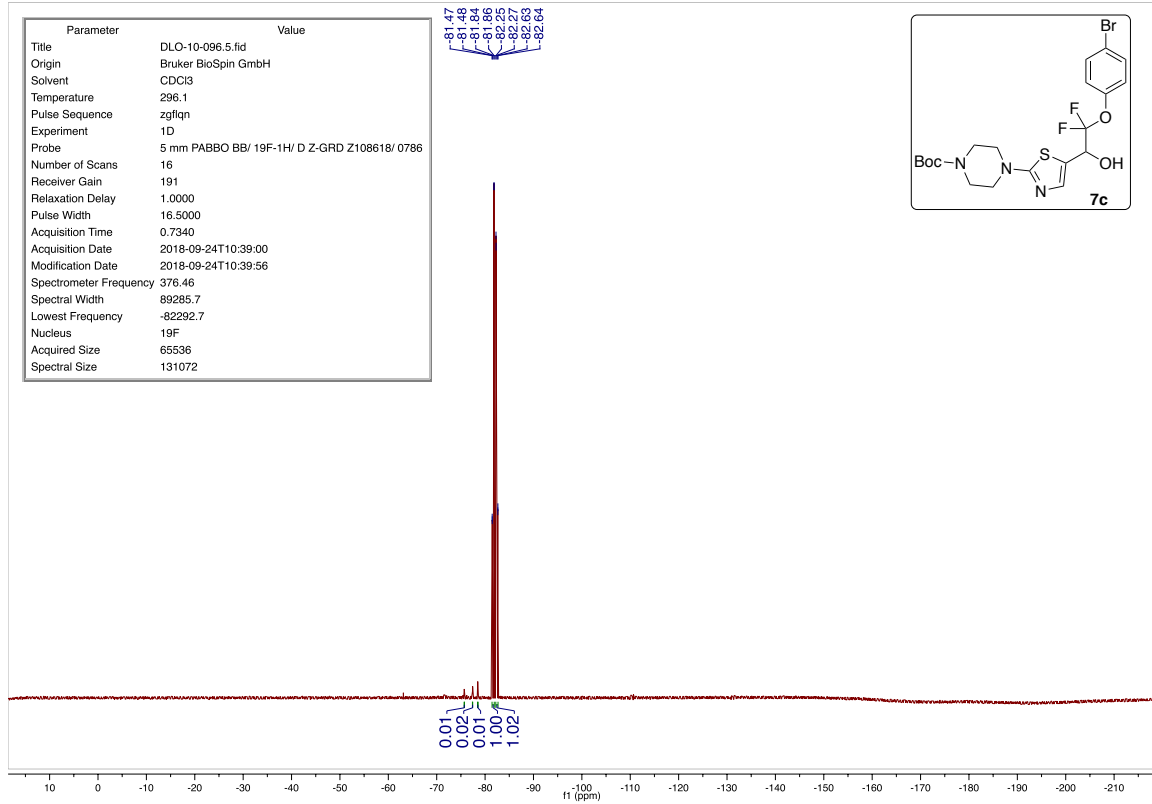

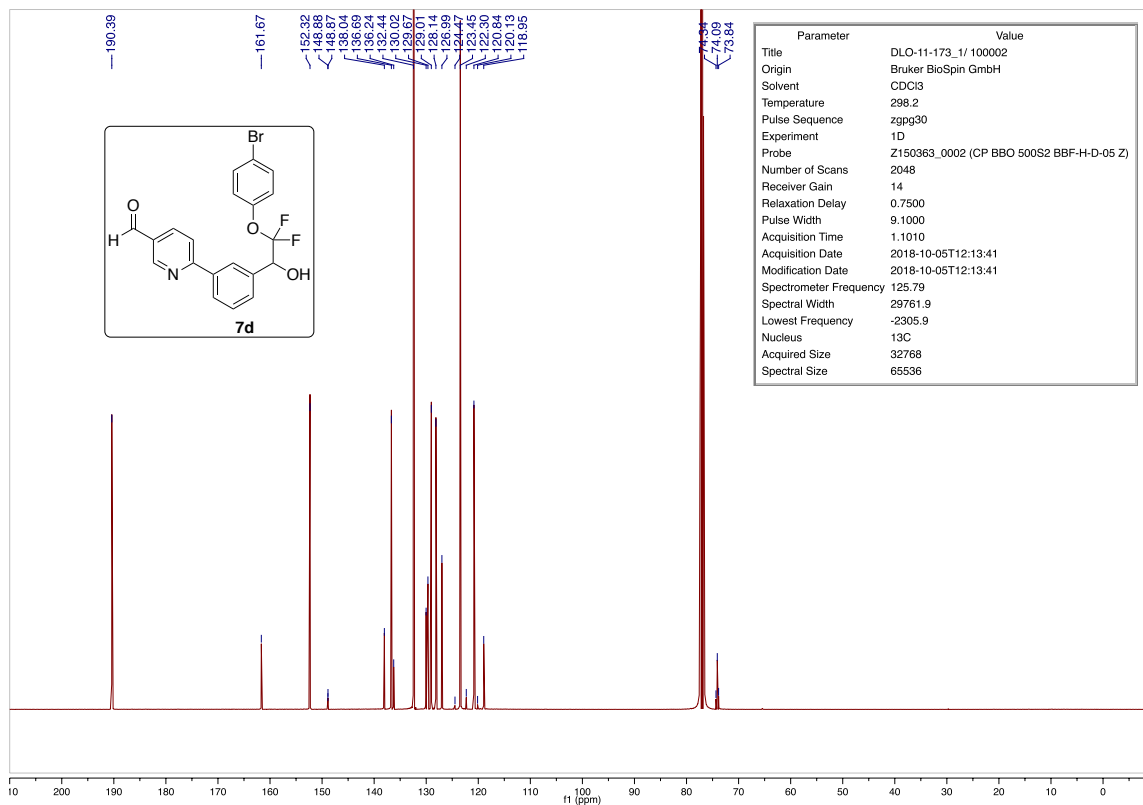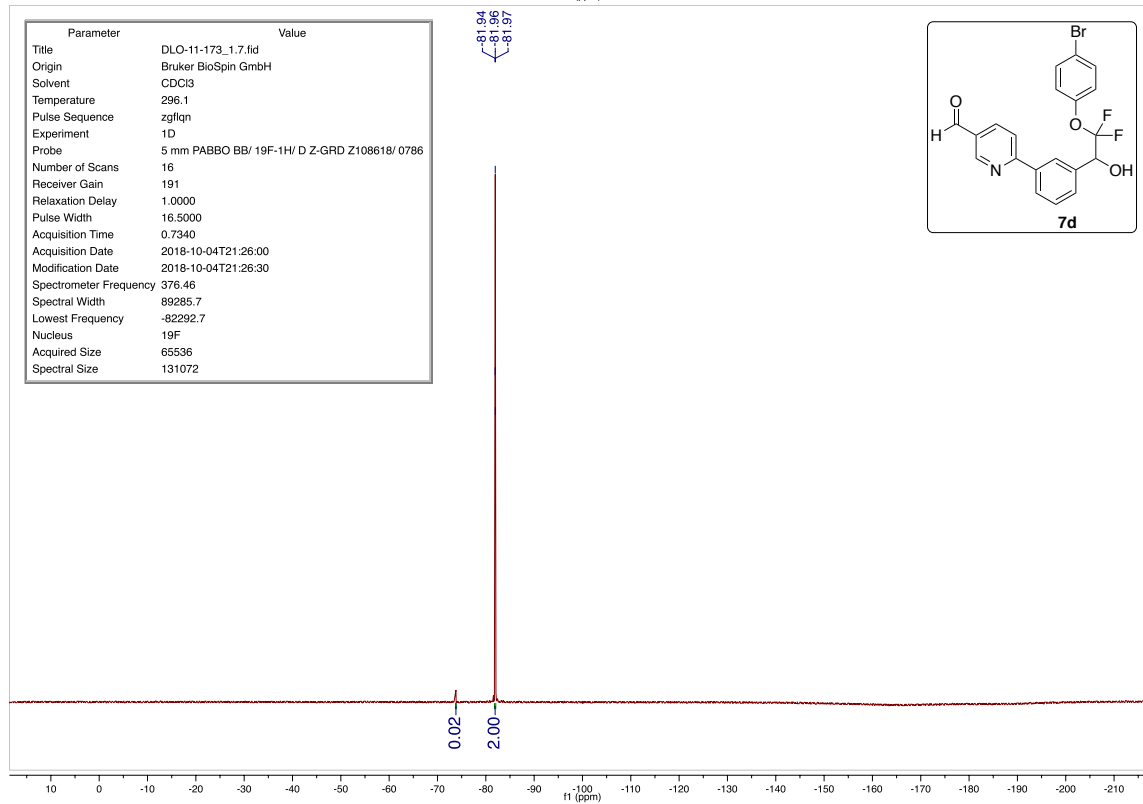

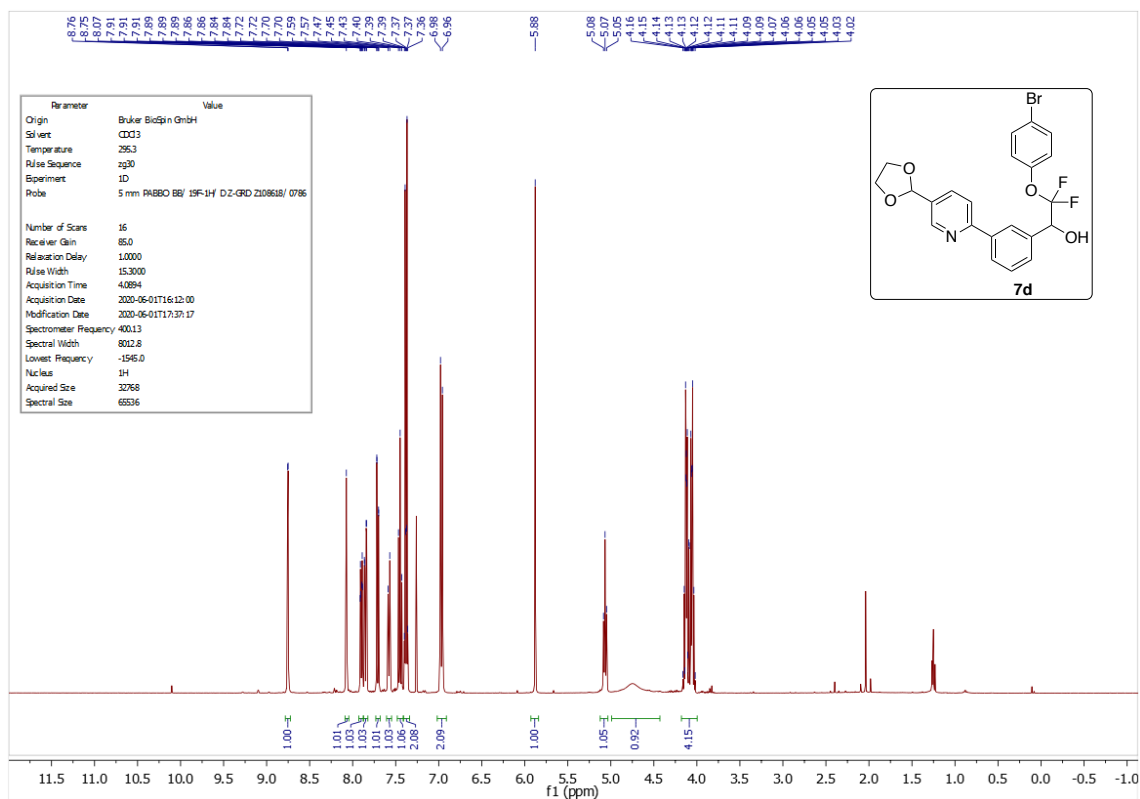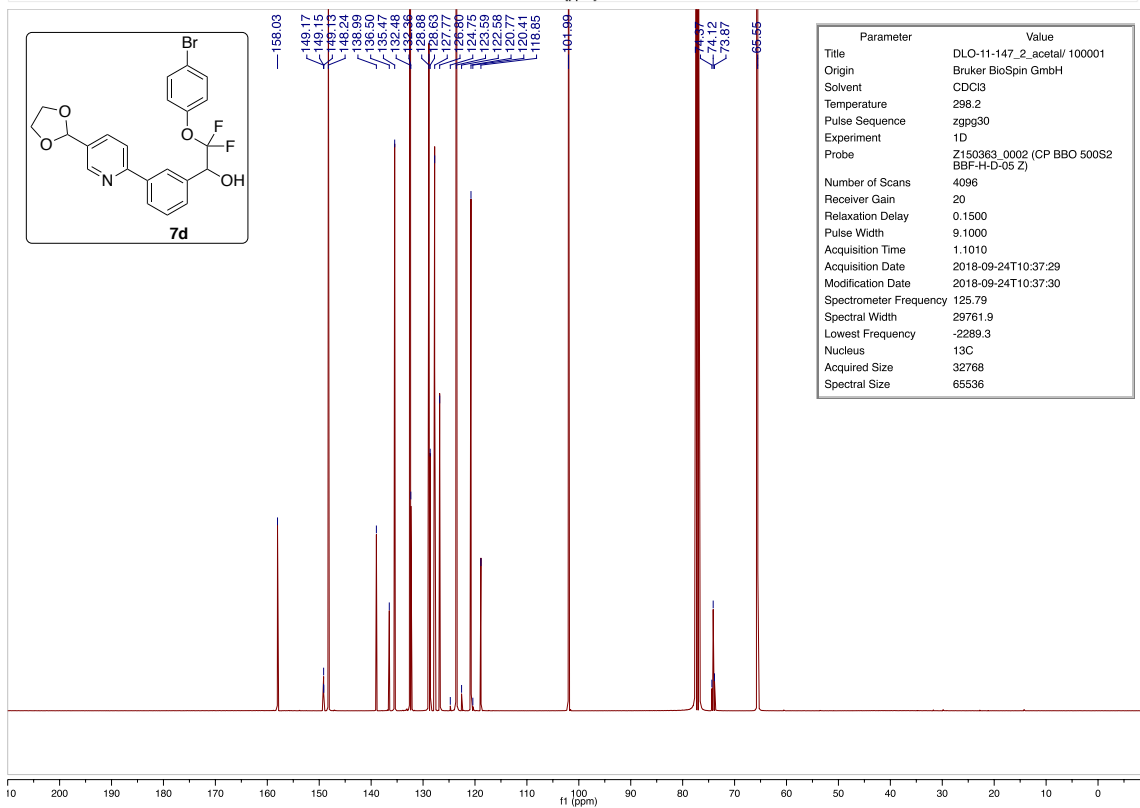



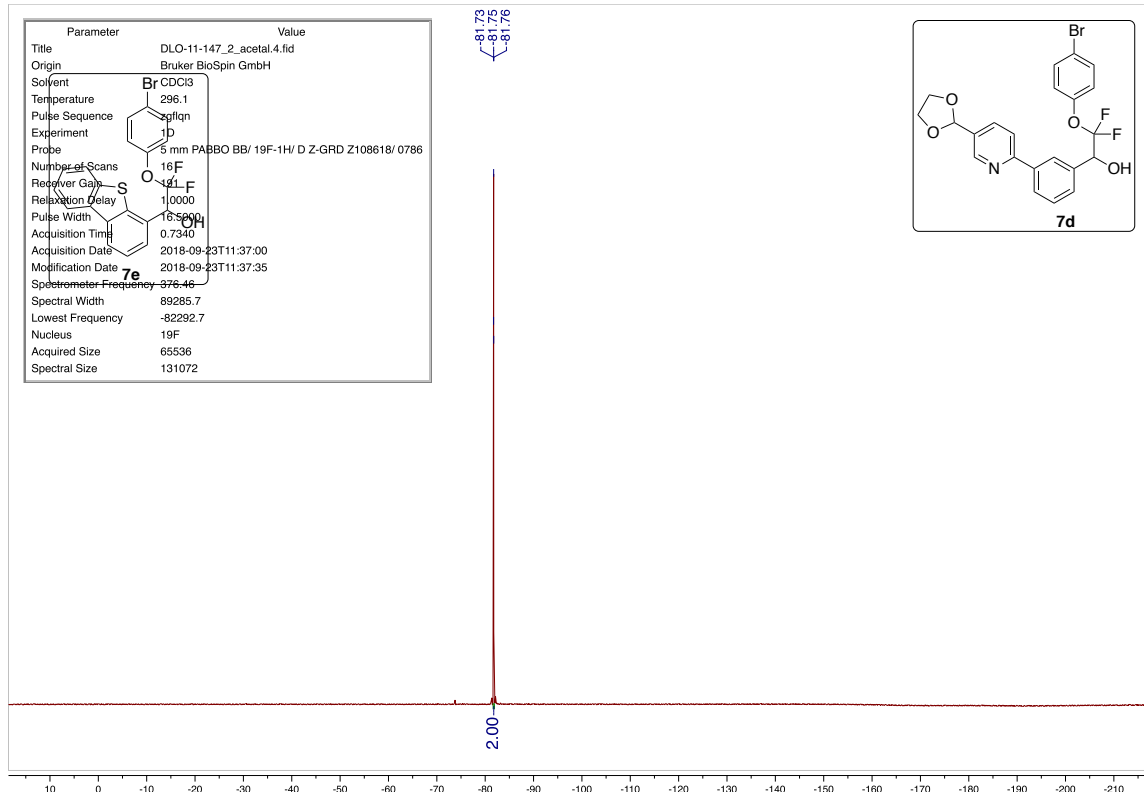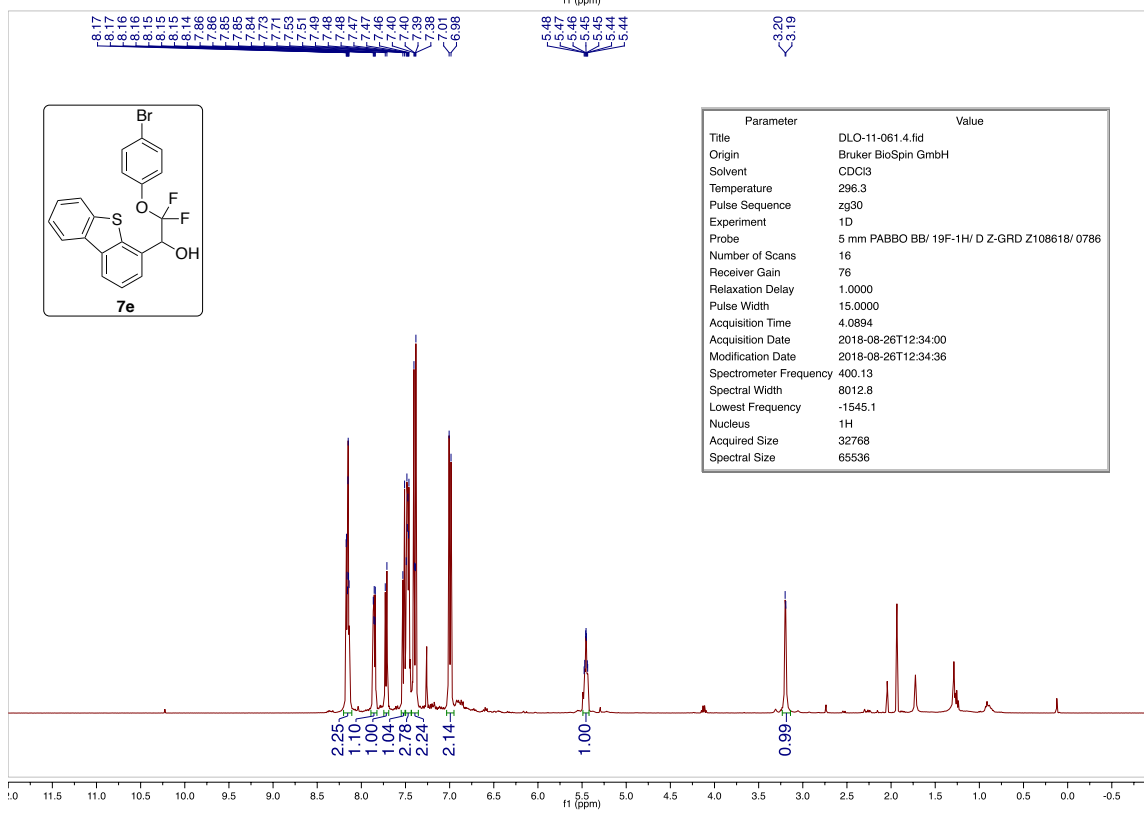

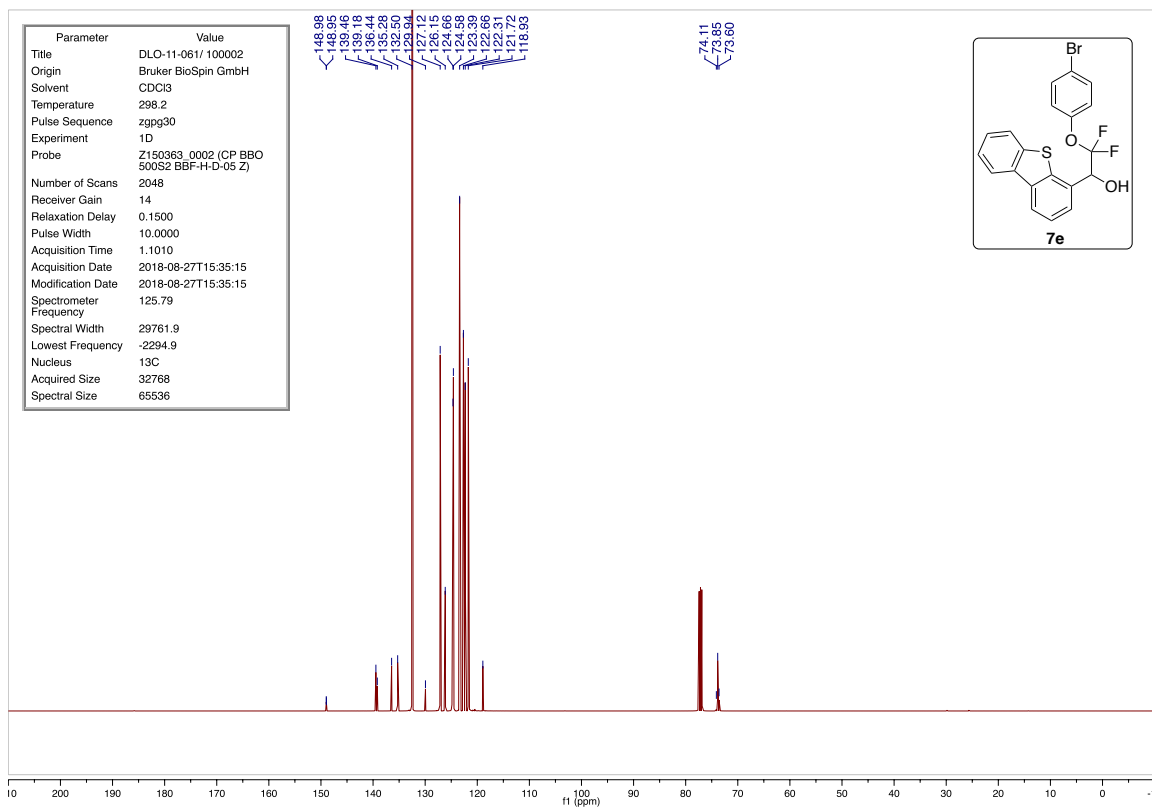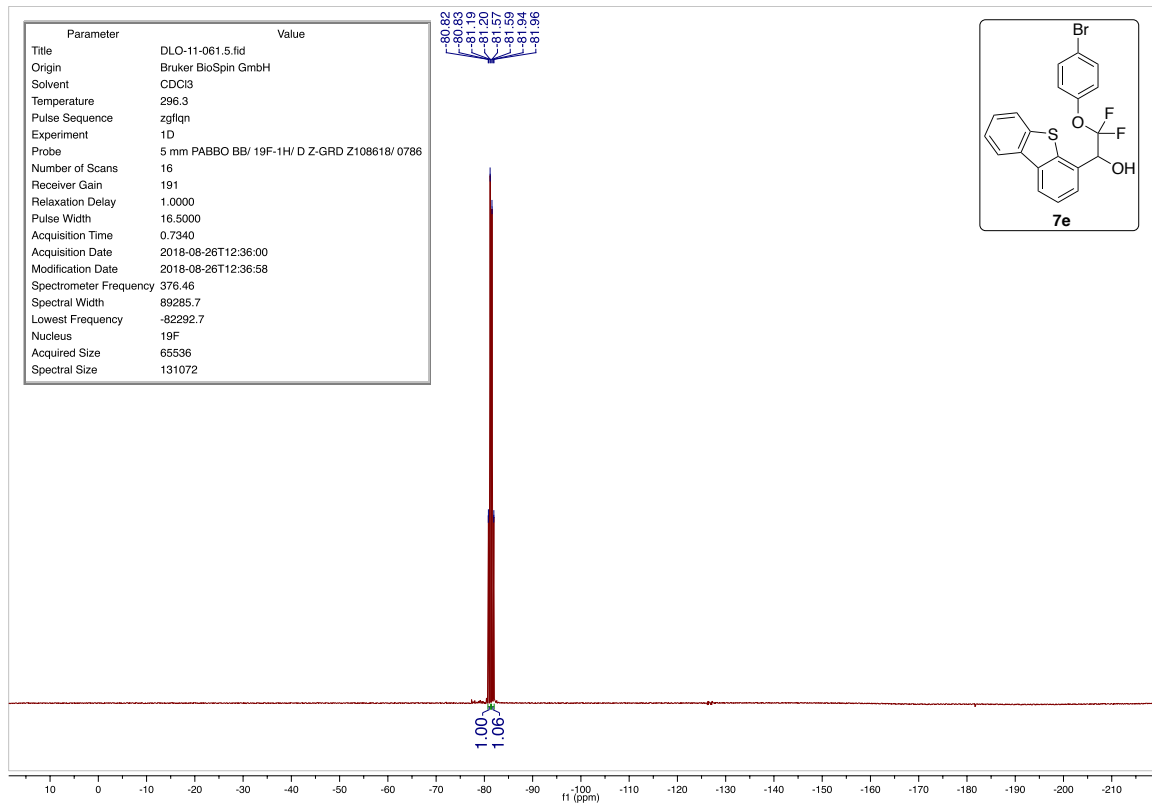

# NMR Spectra of Compounds in Table 4:

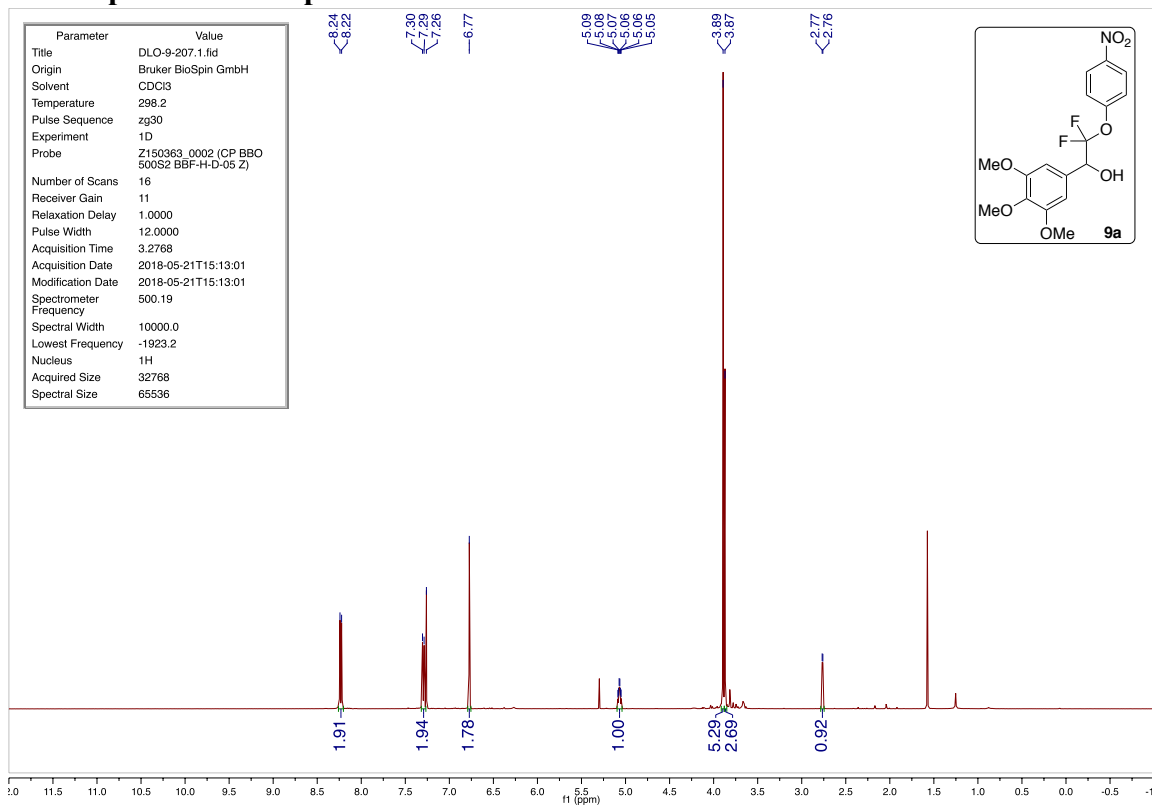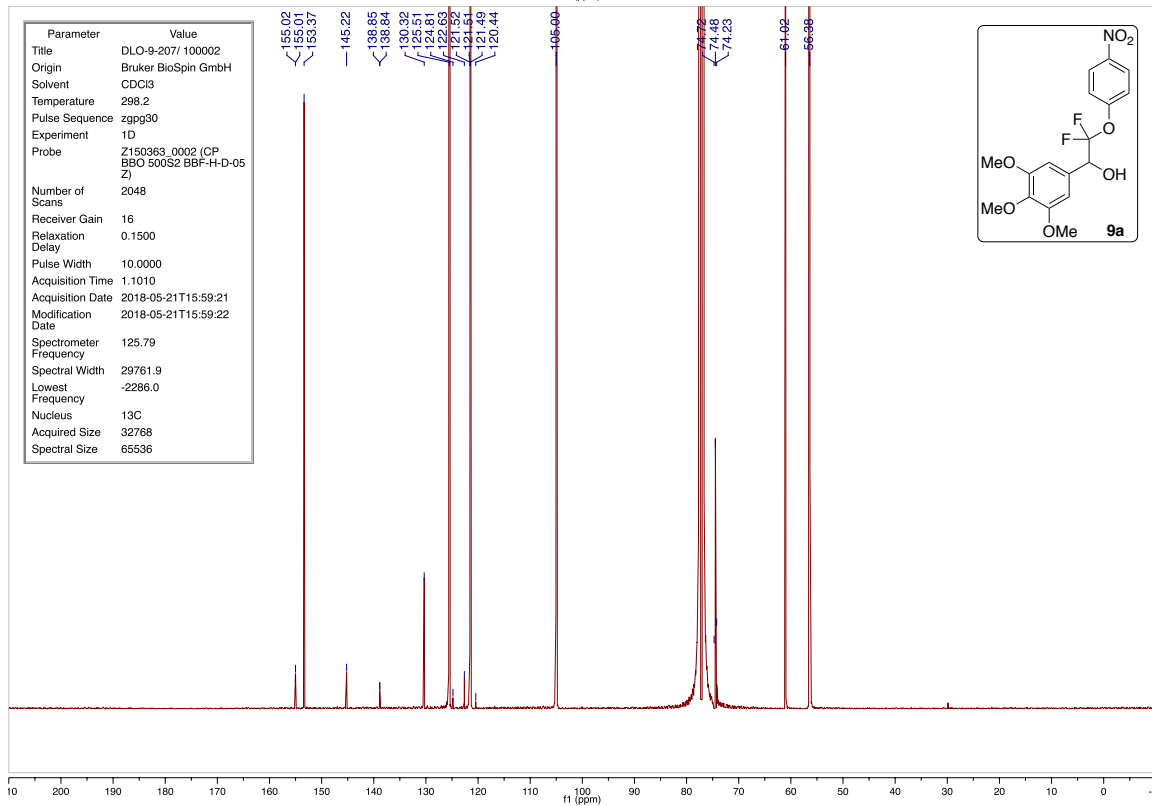

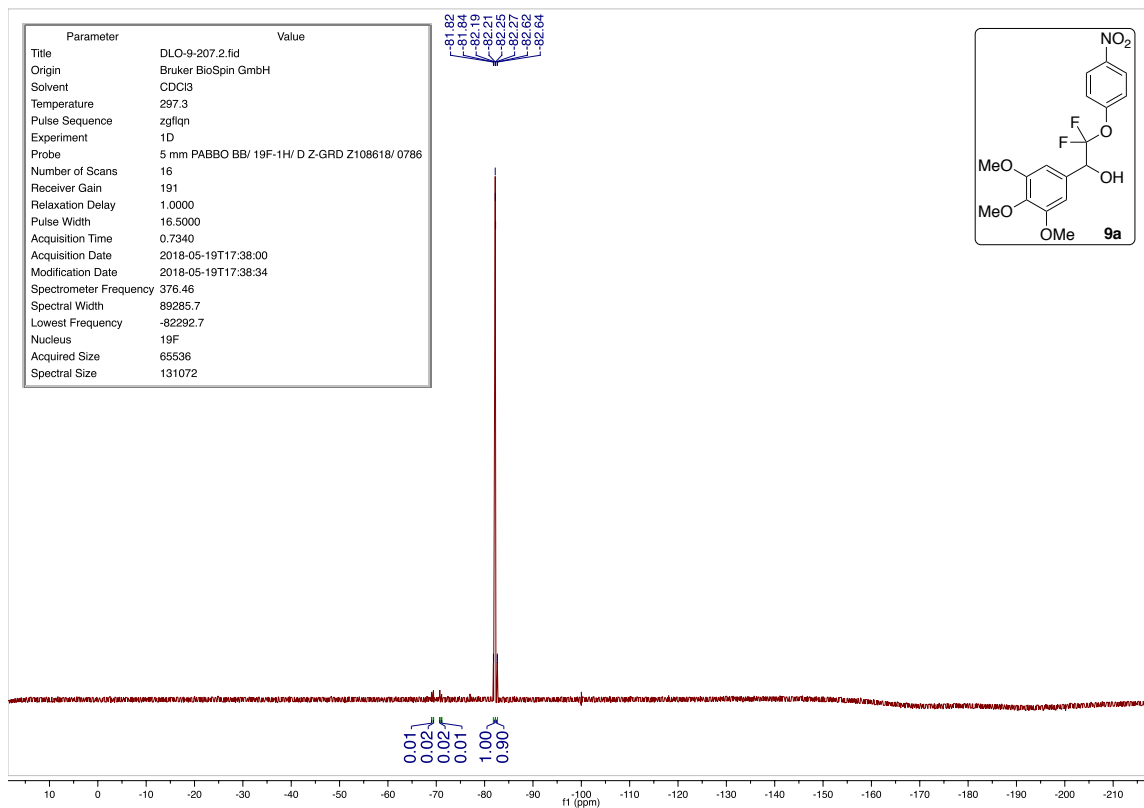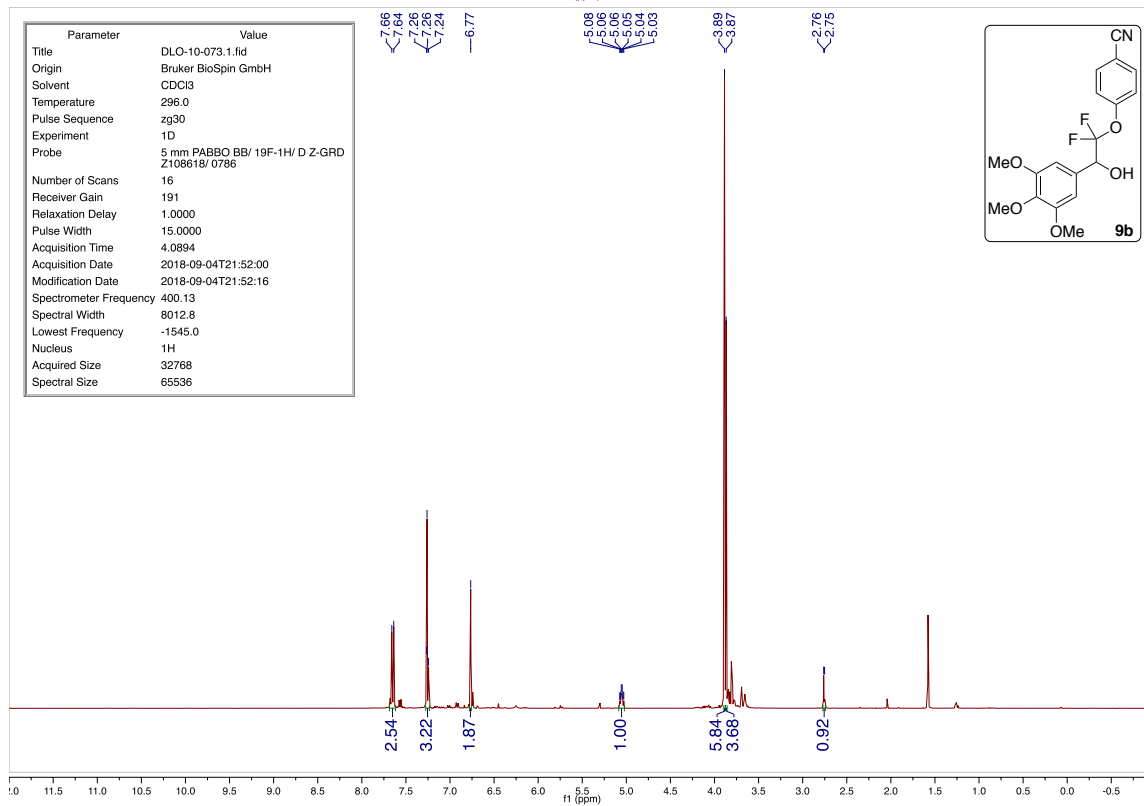

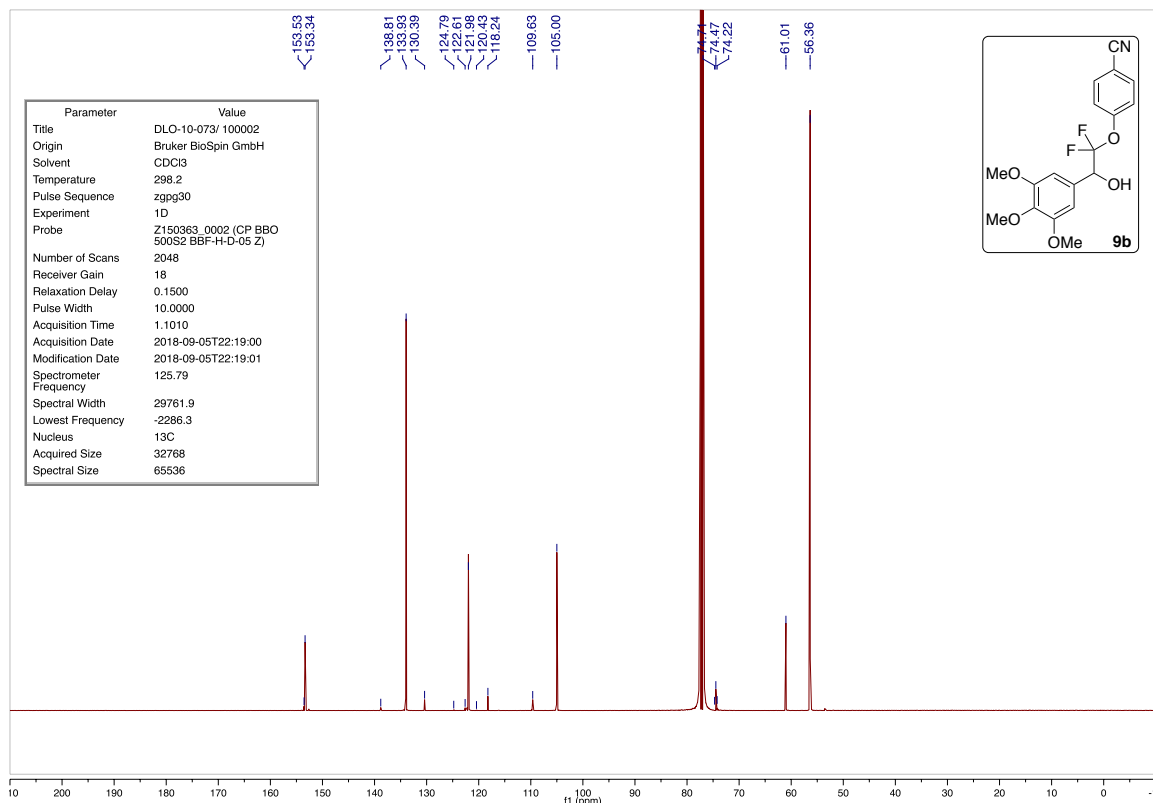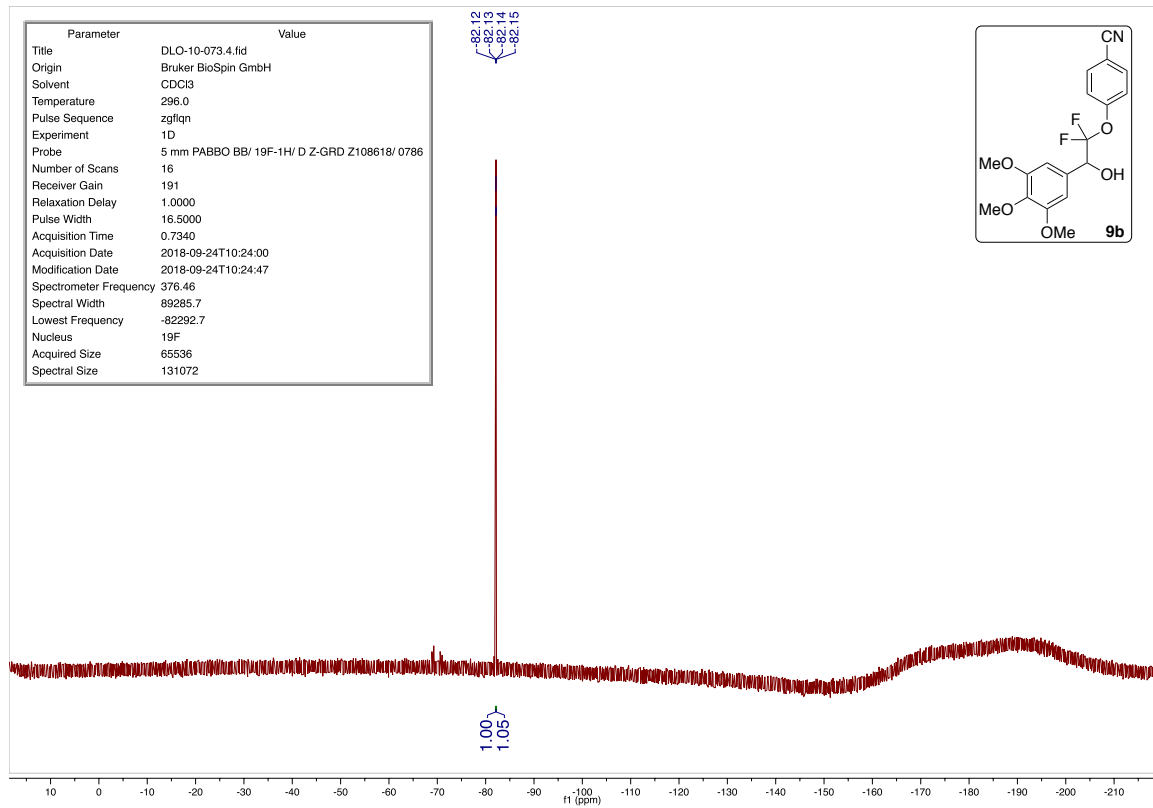

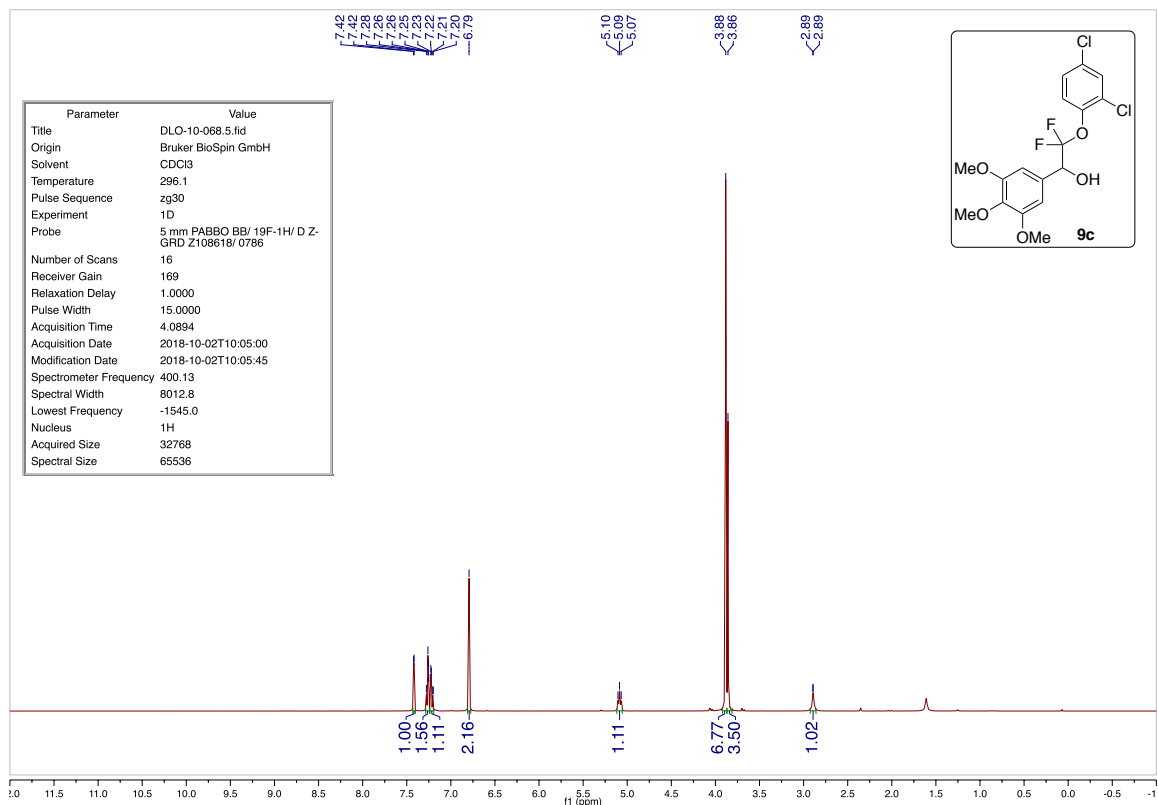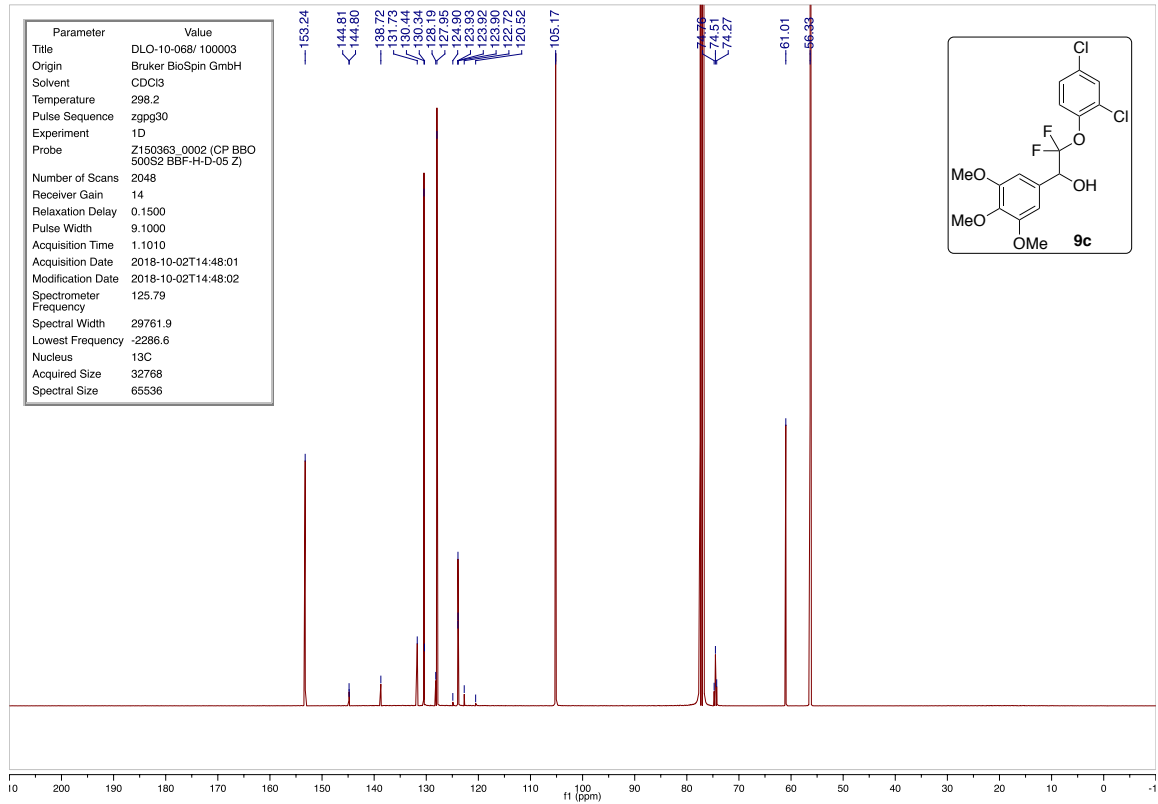

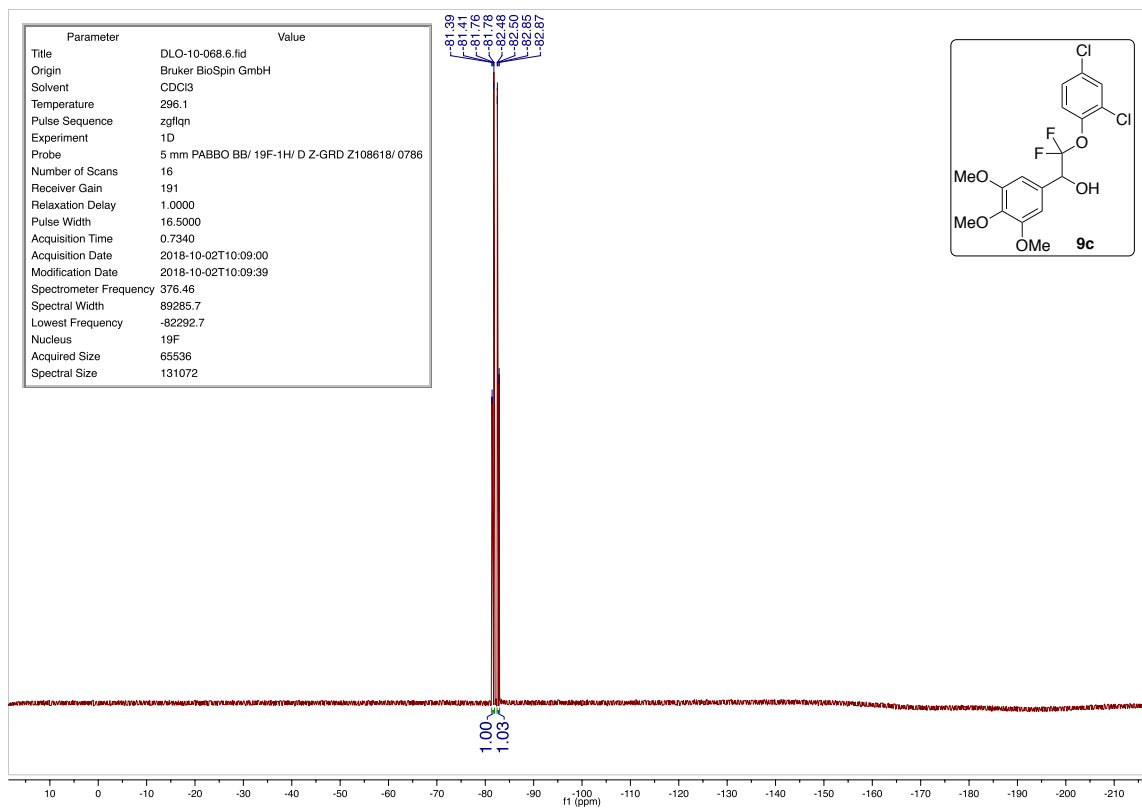

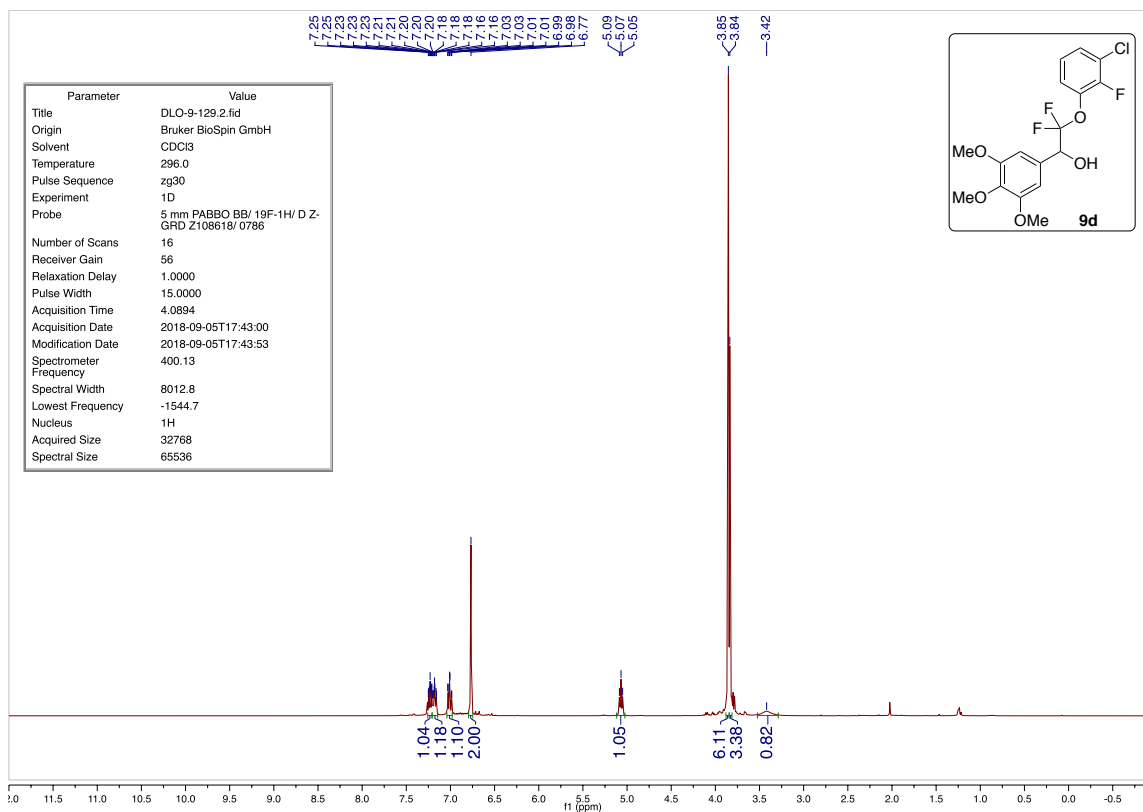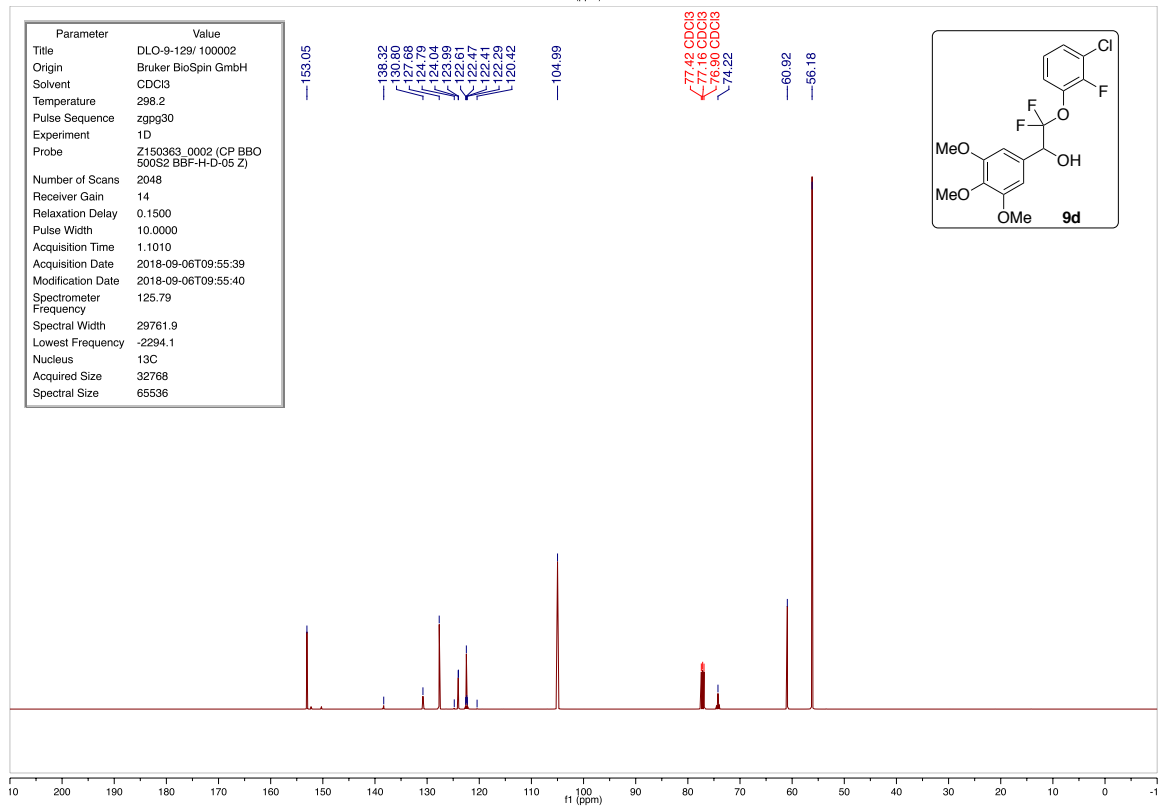



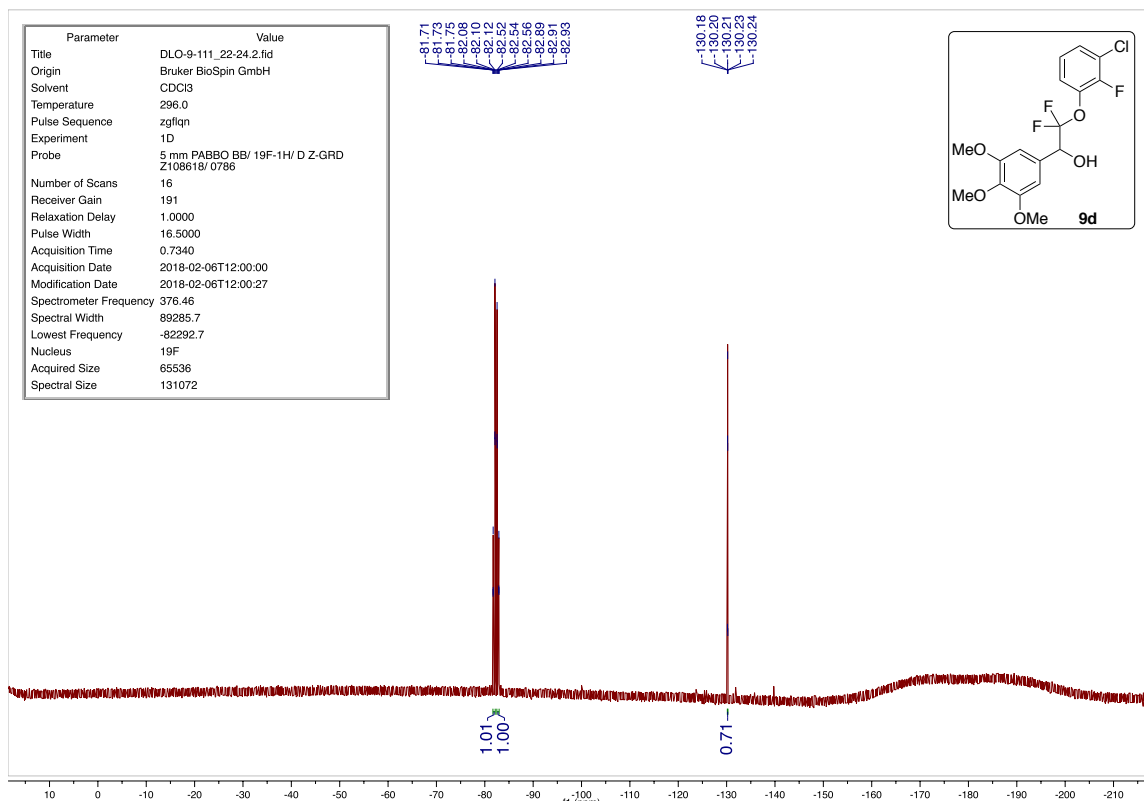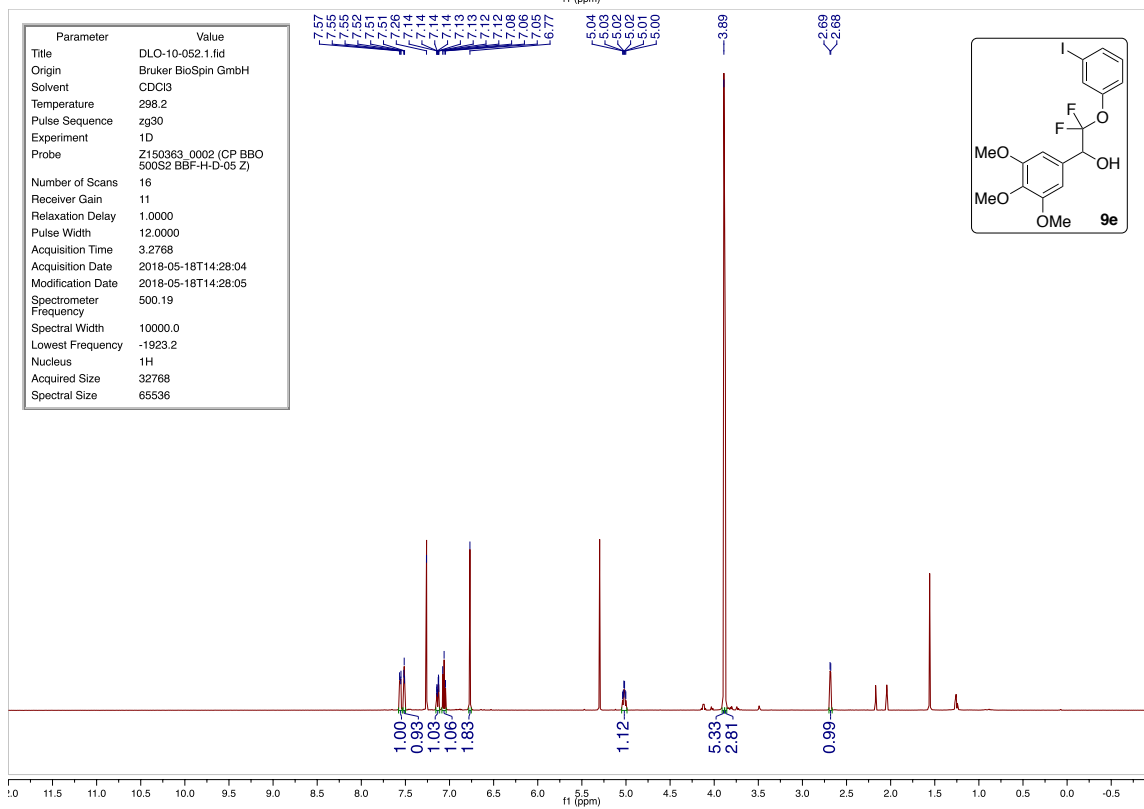

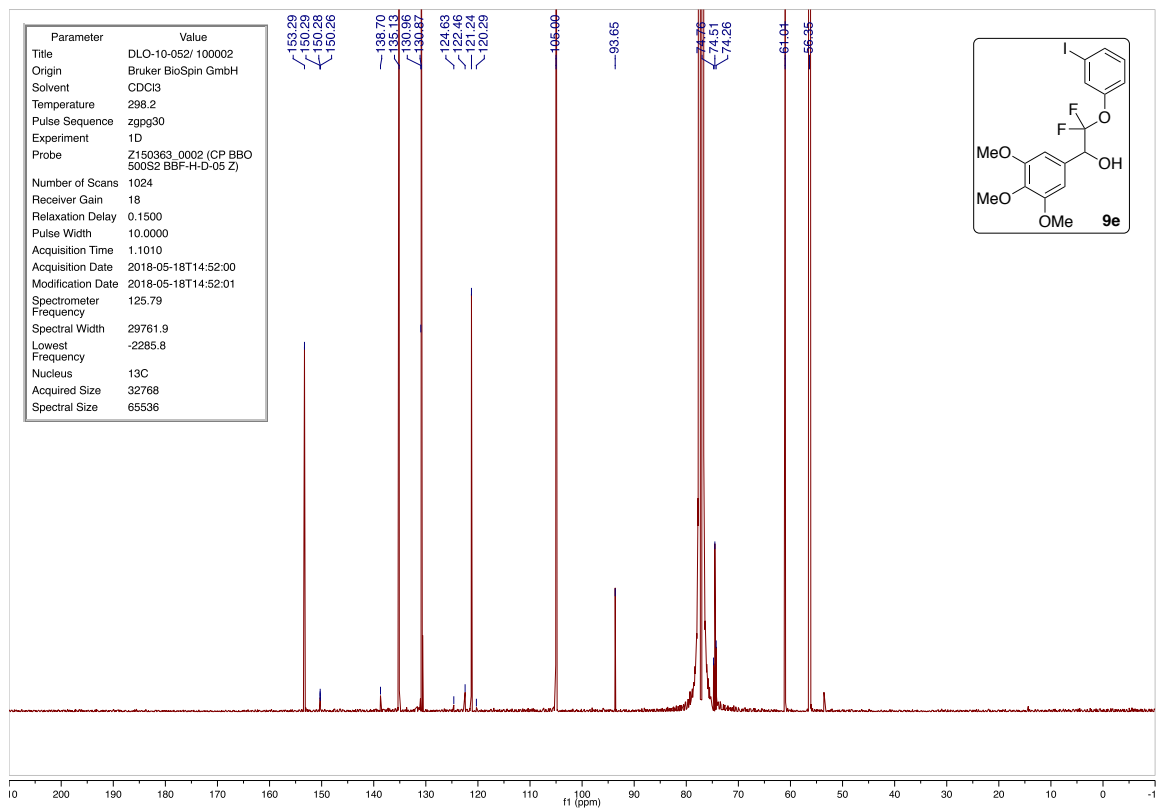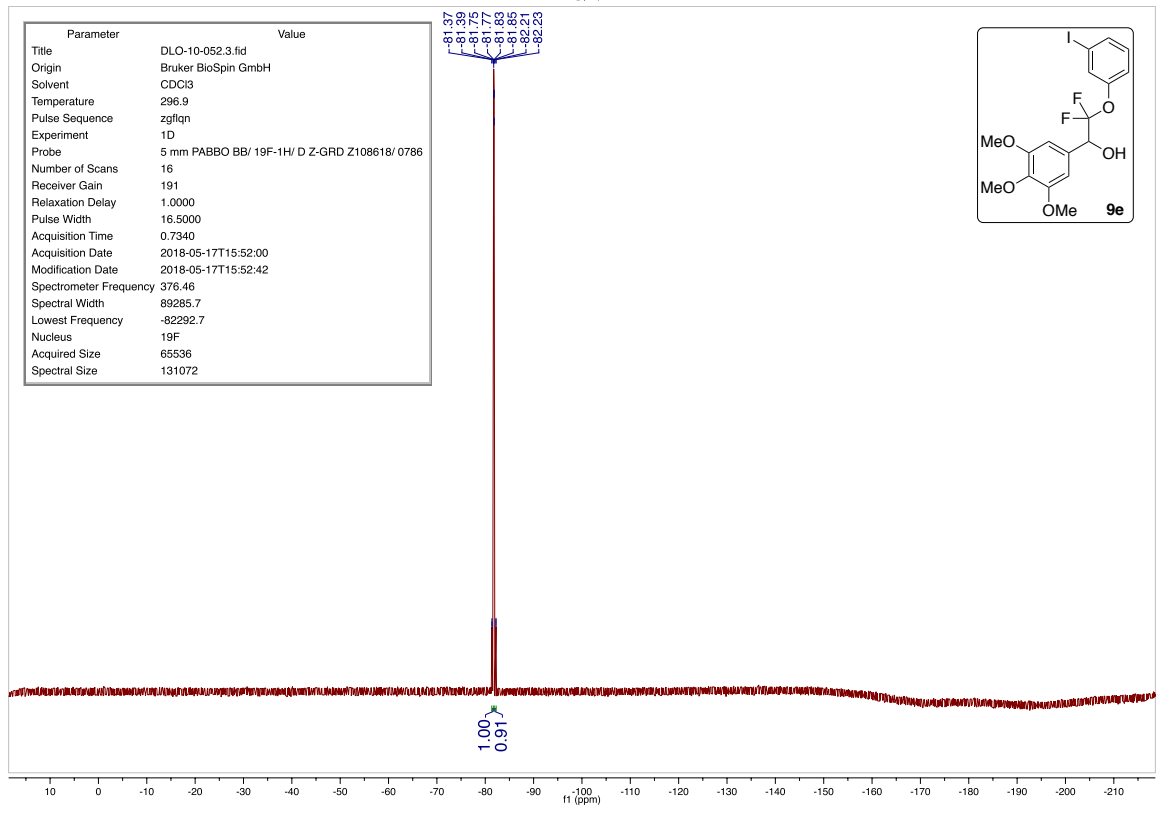

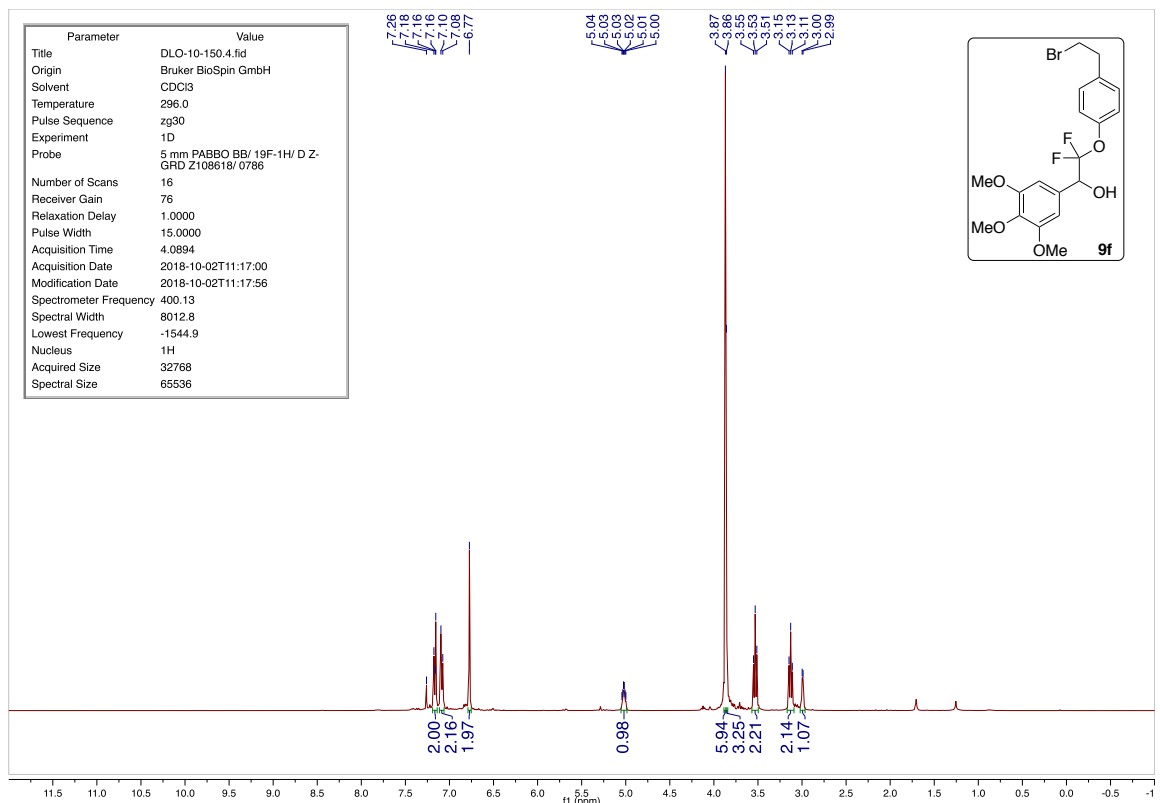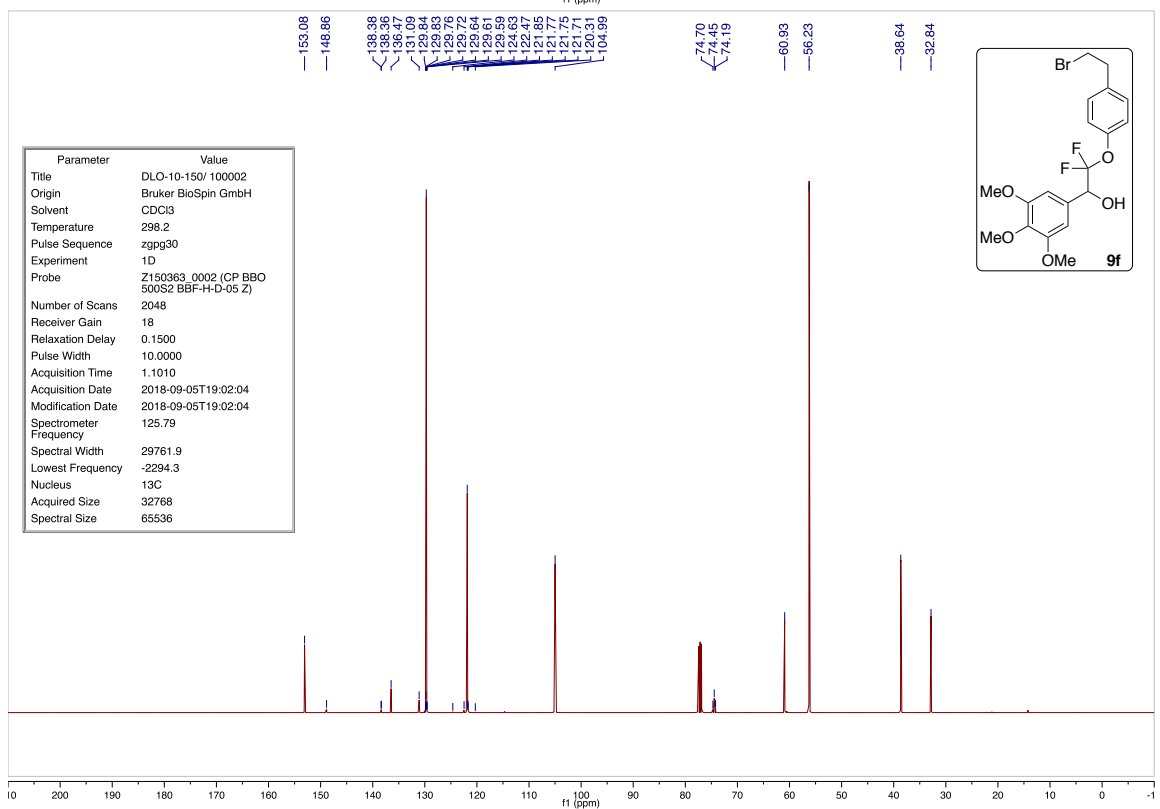

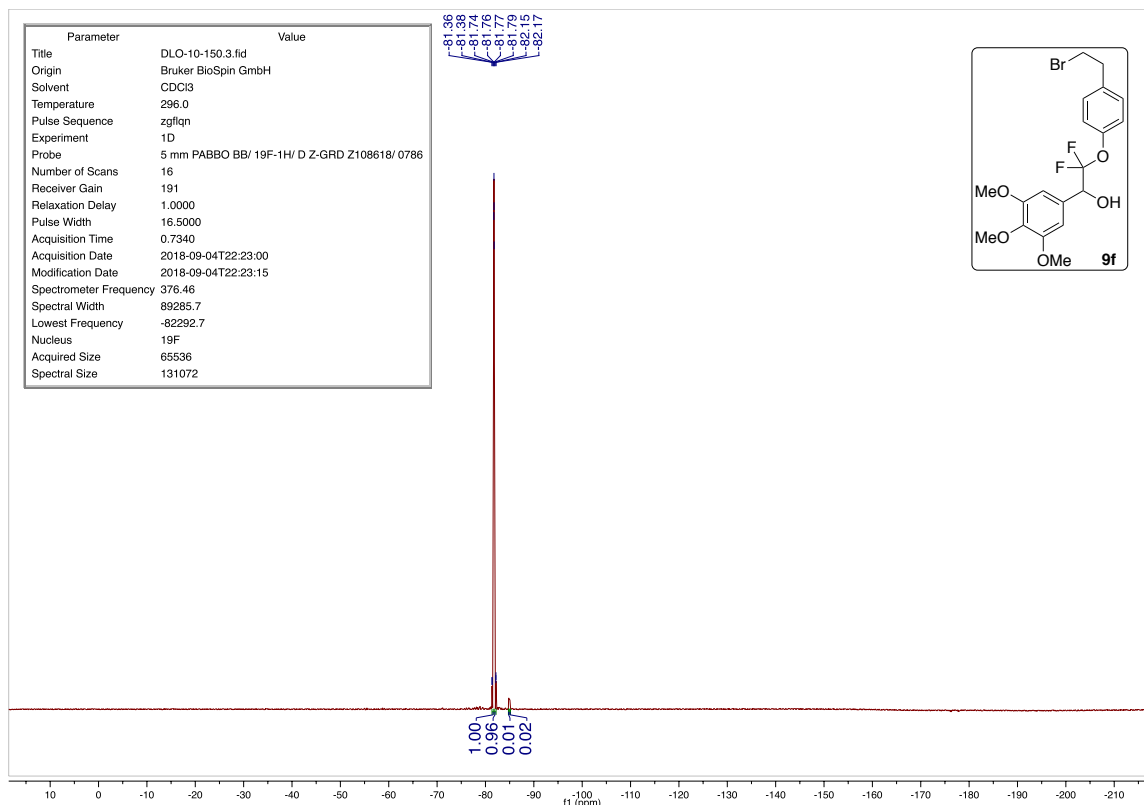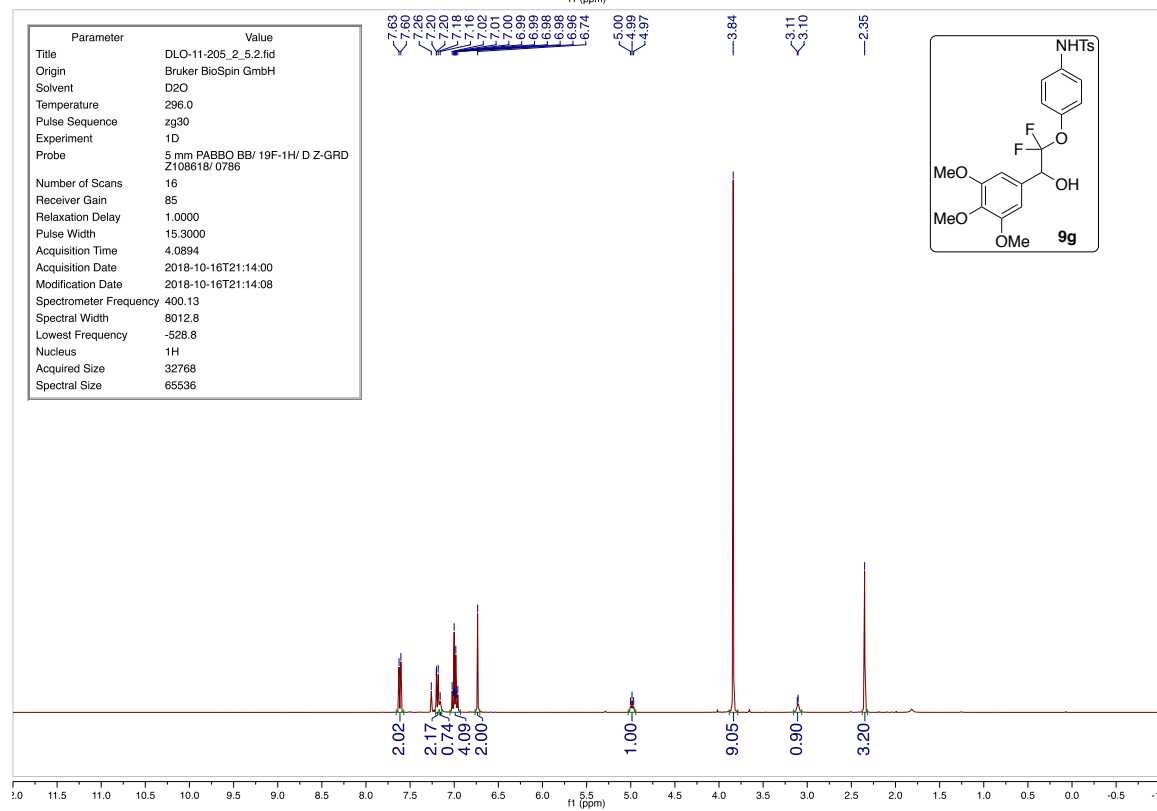

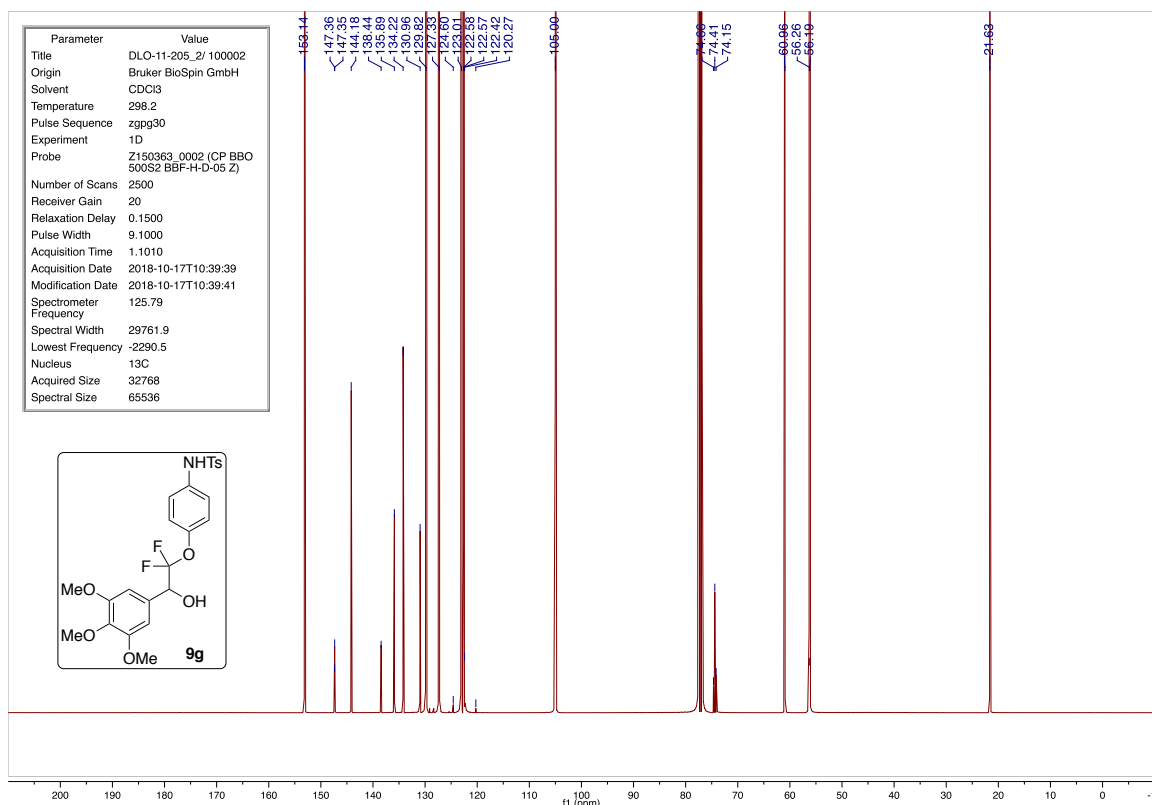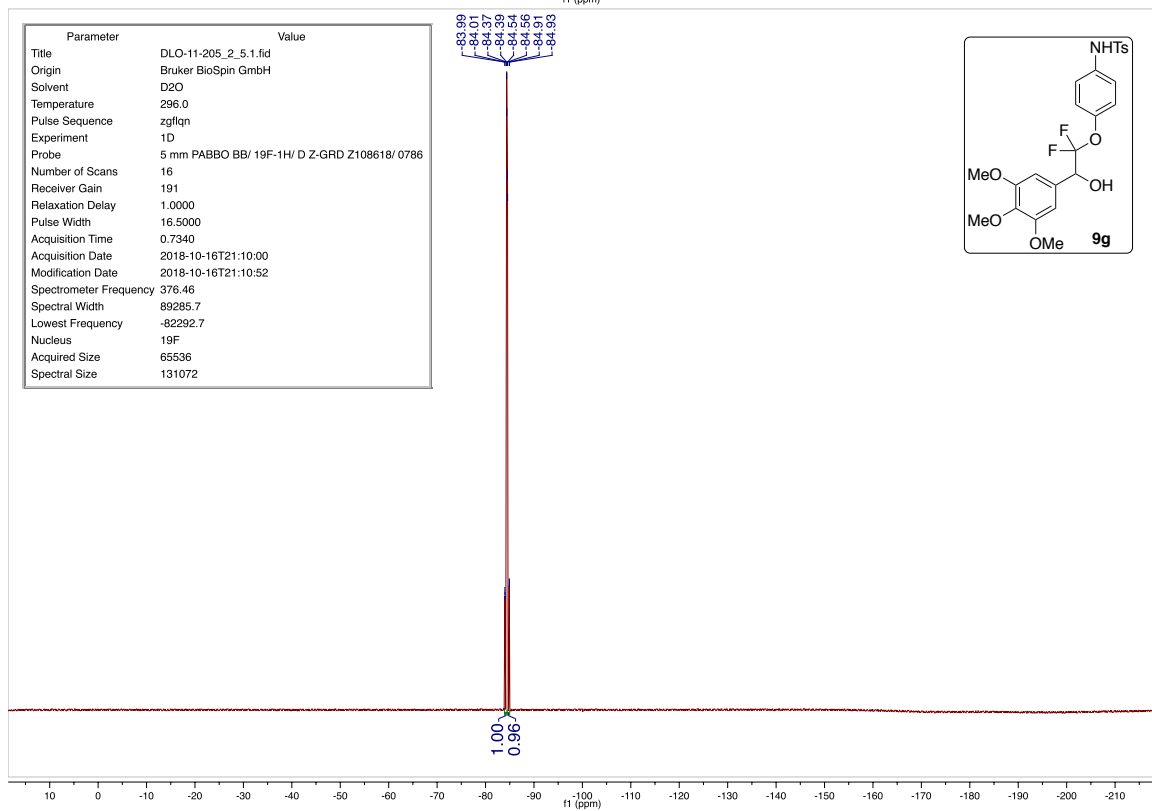

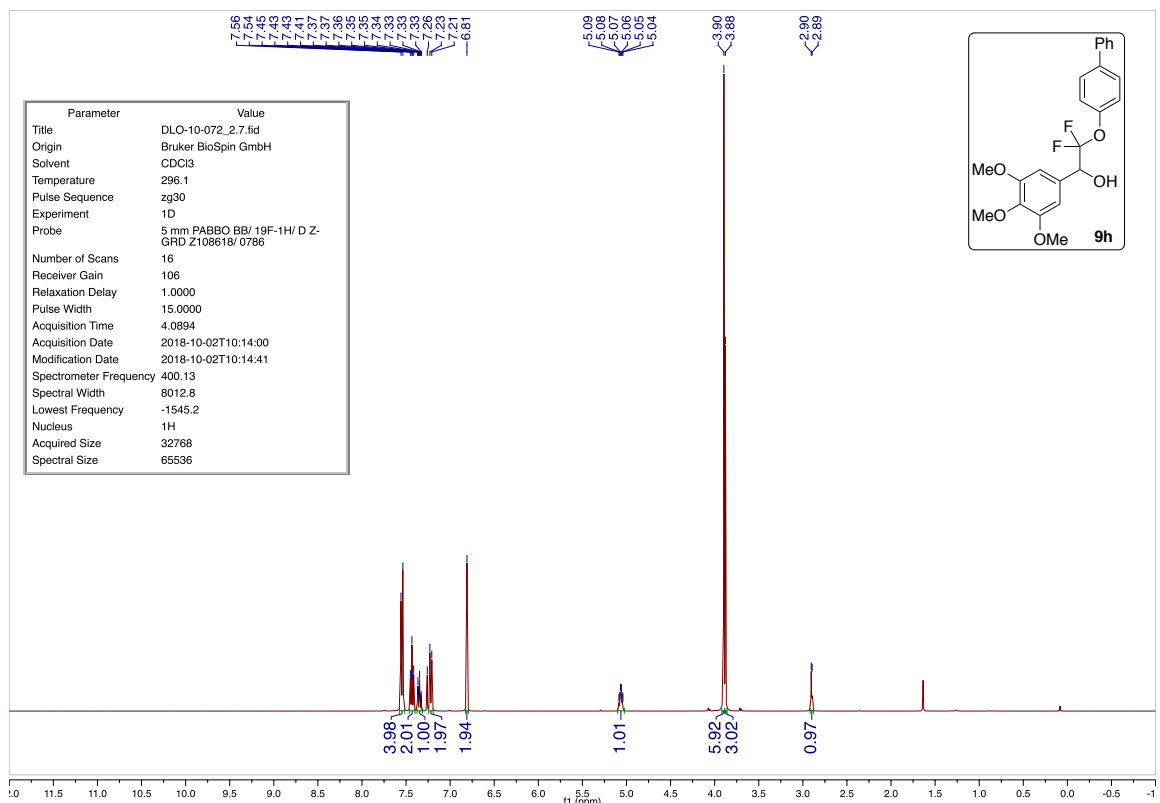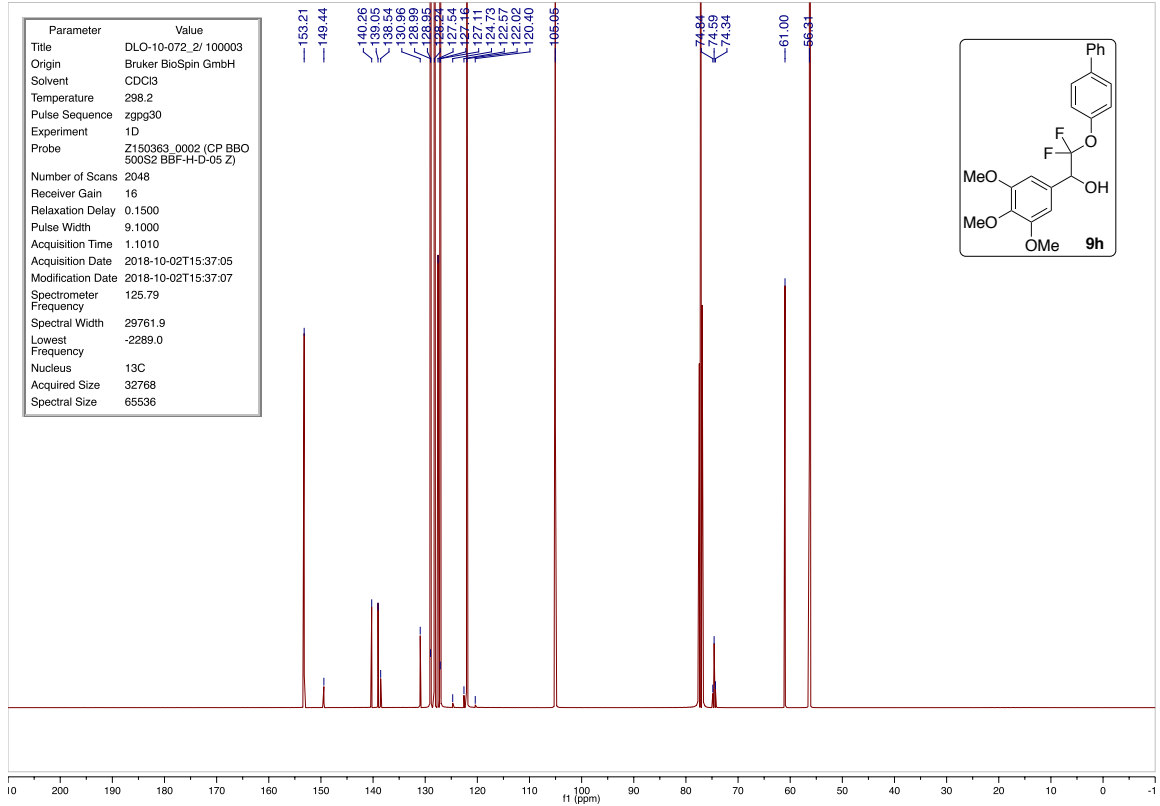

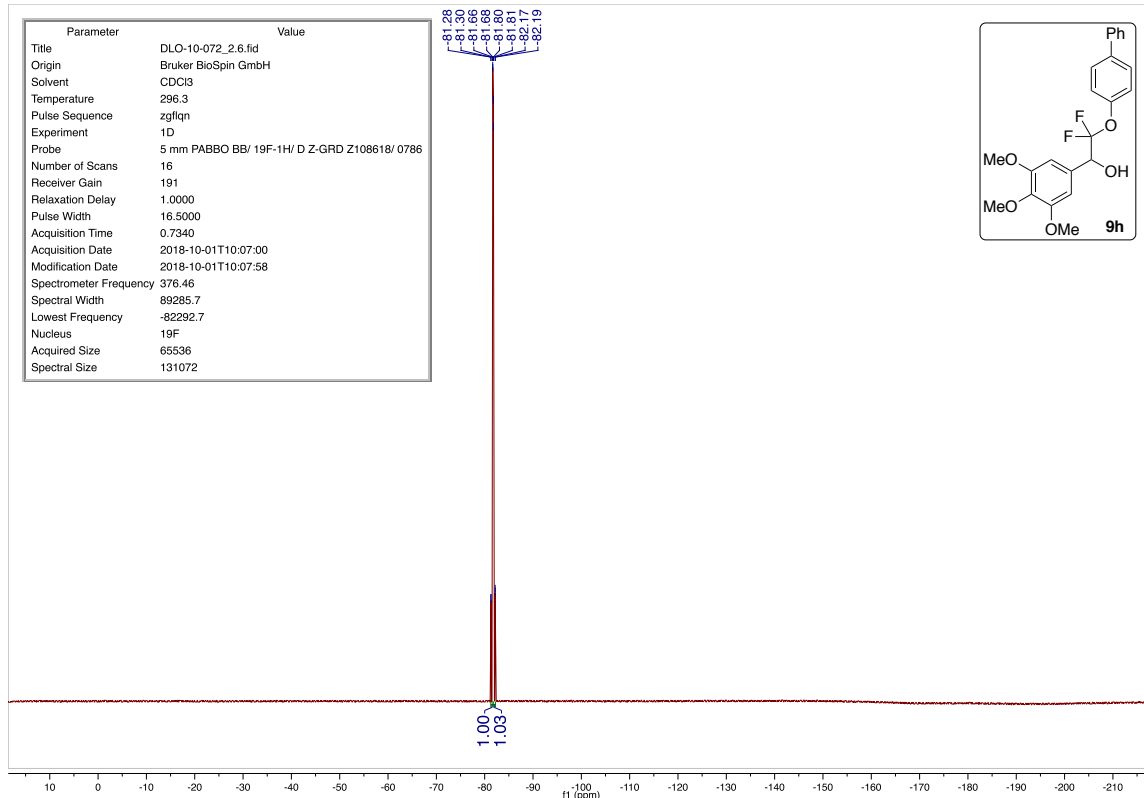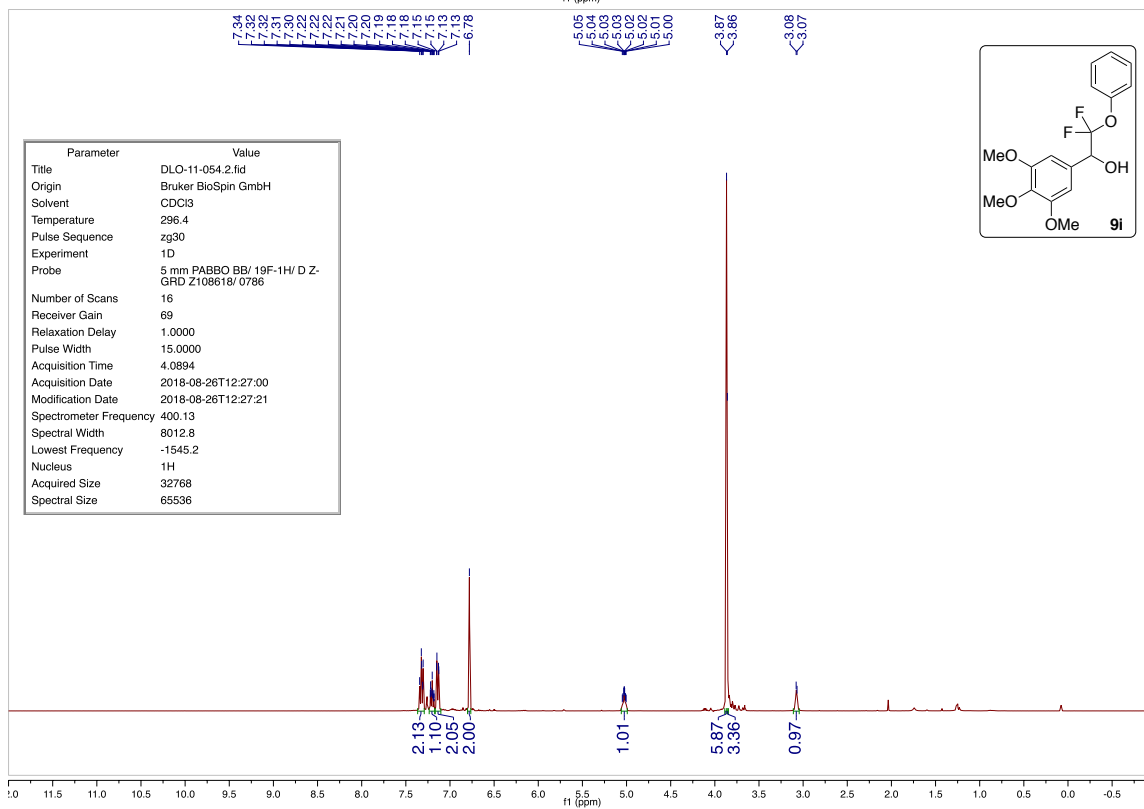

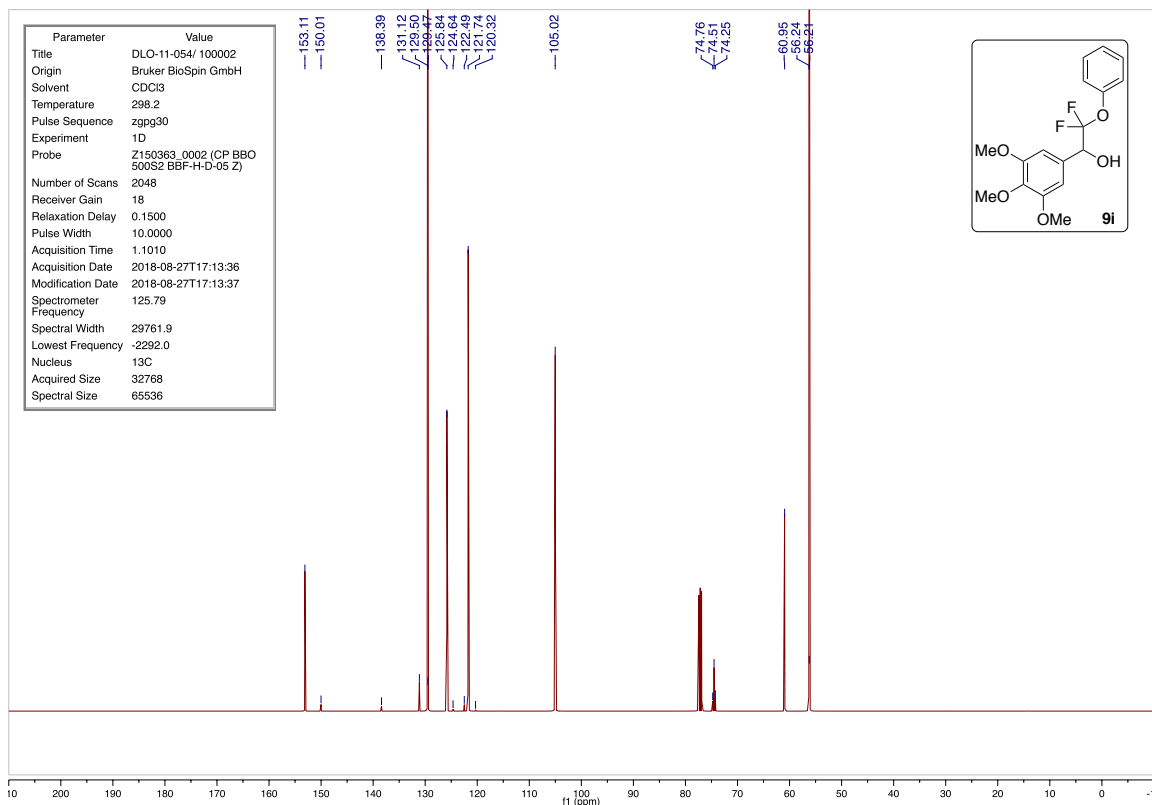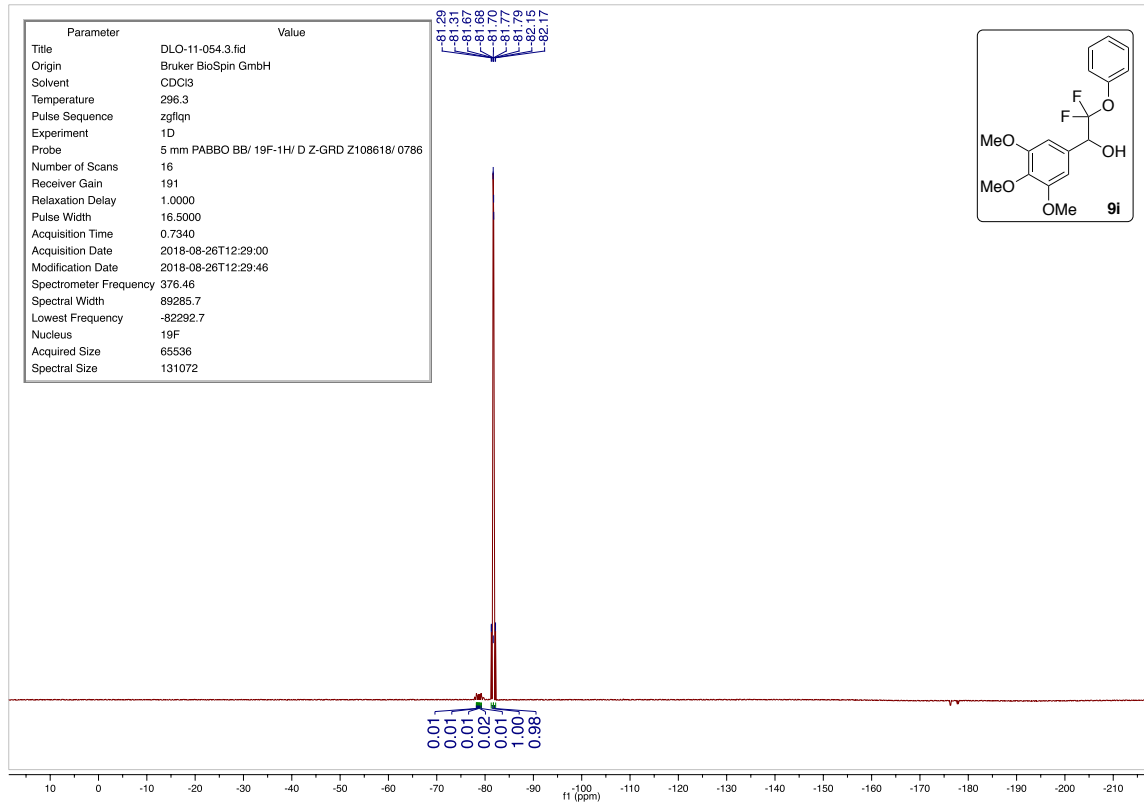



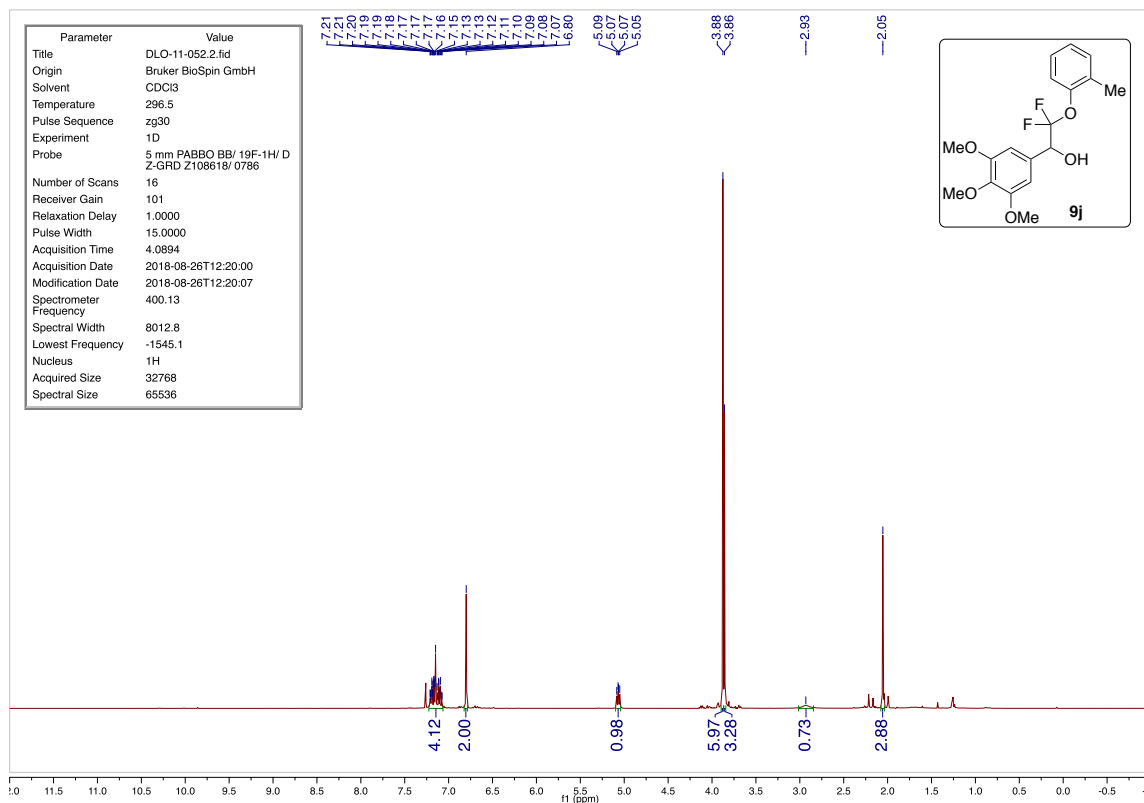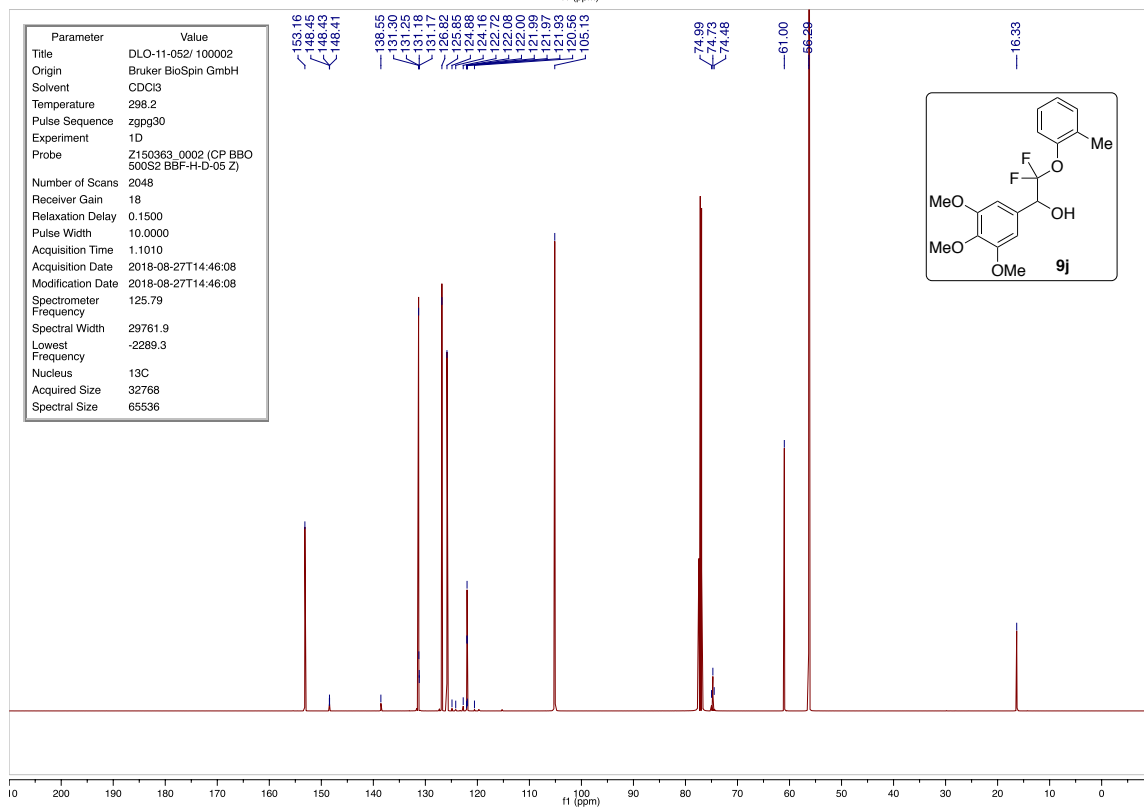

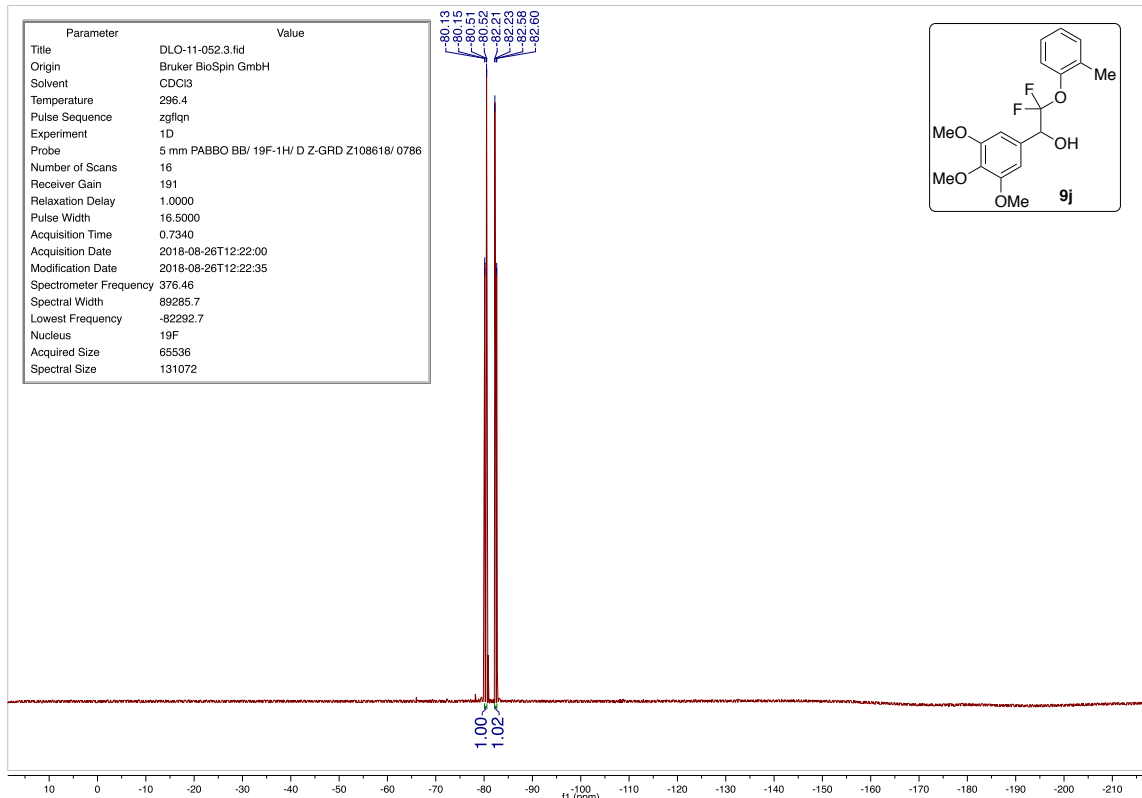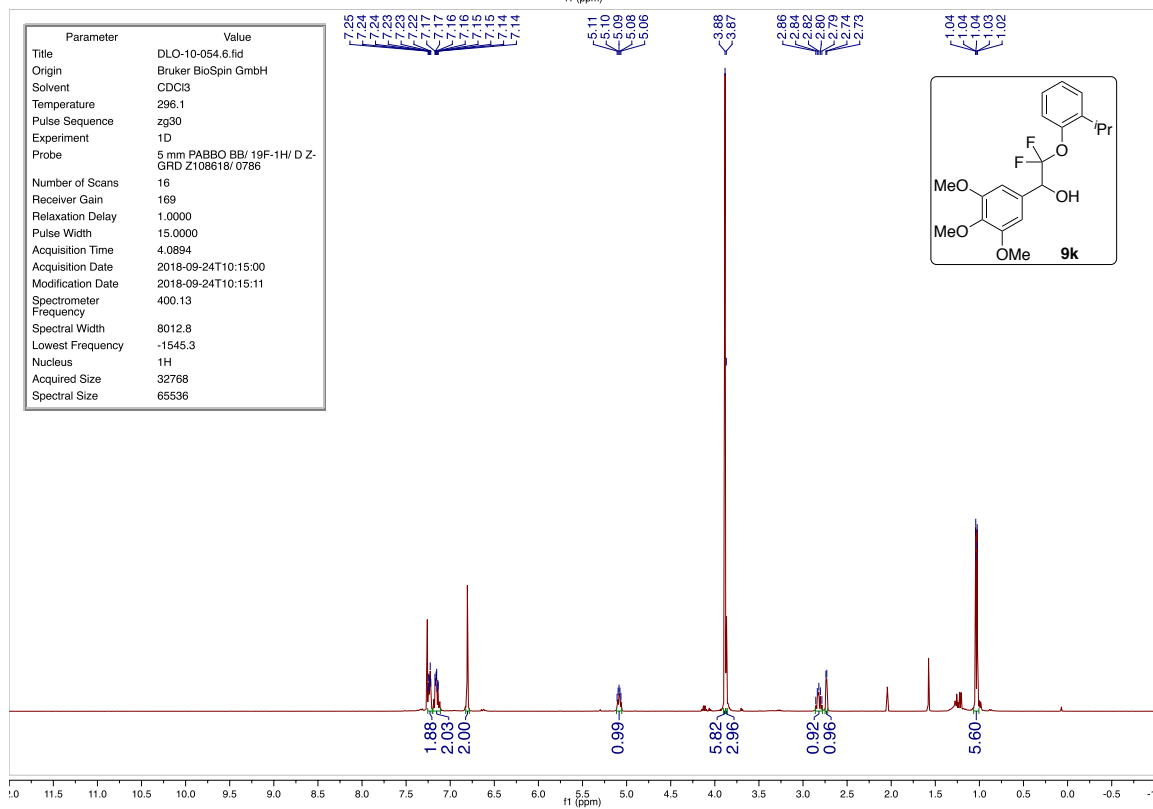

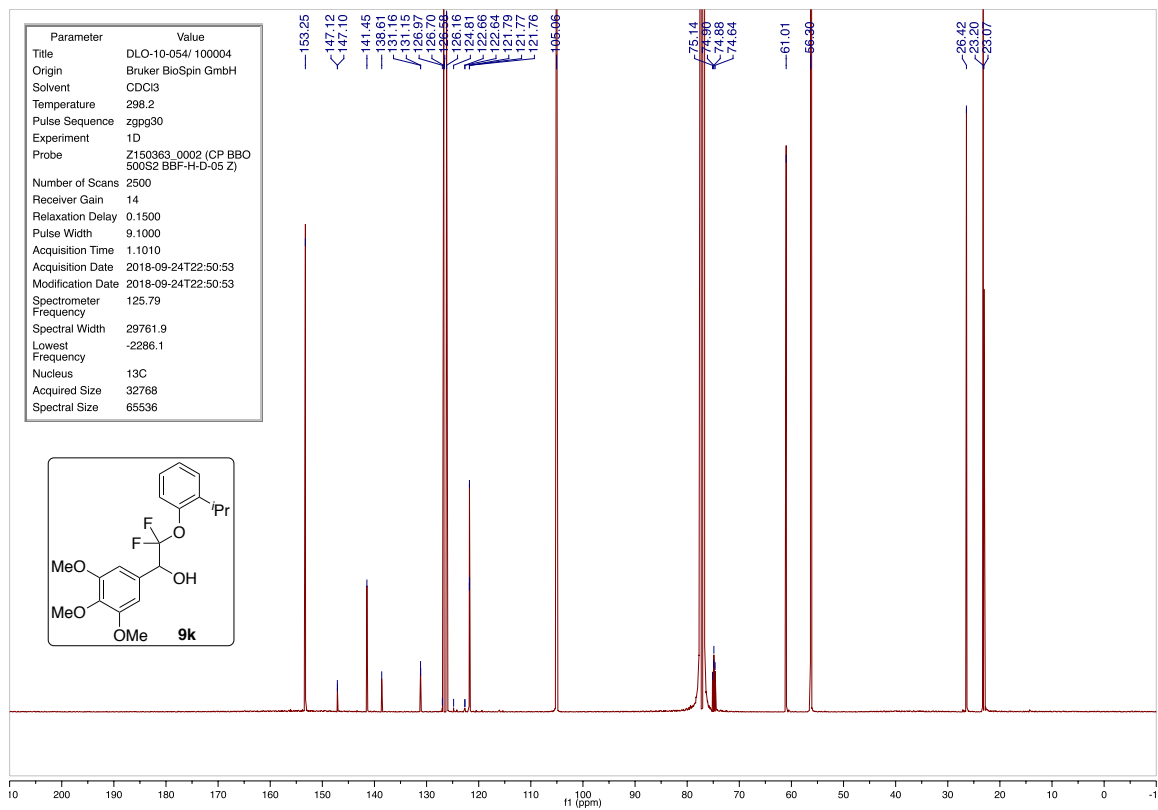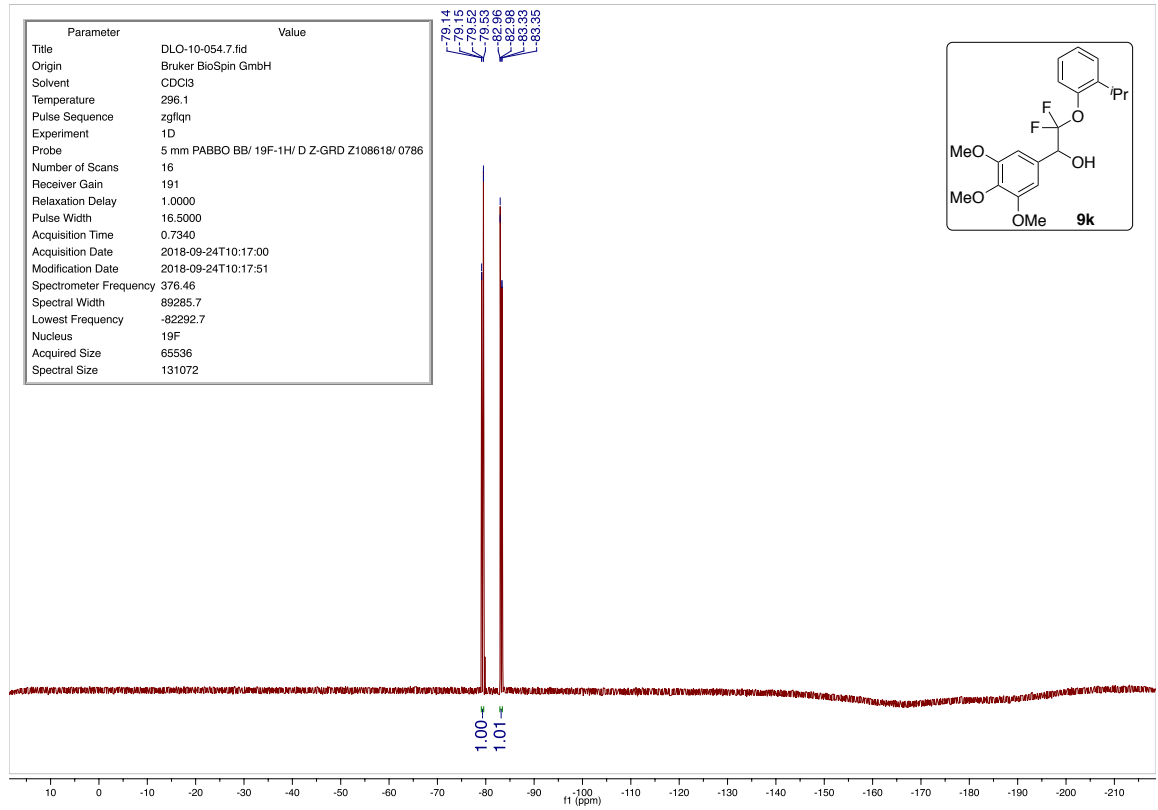

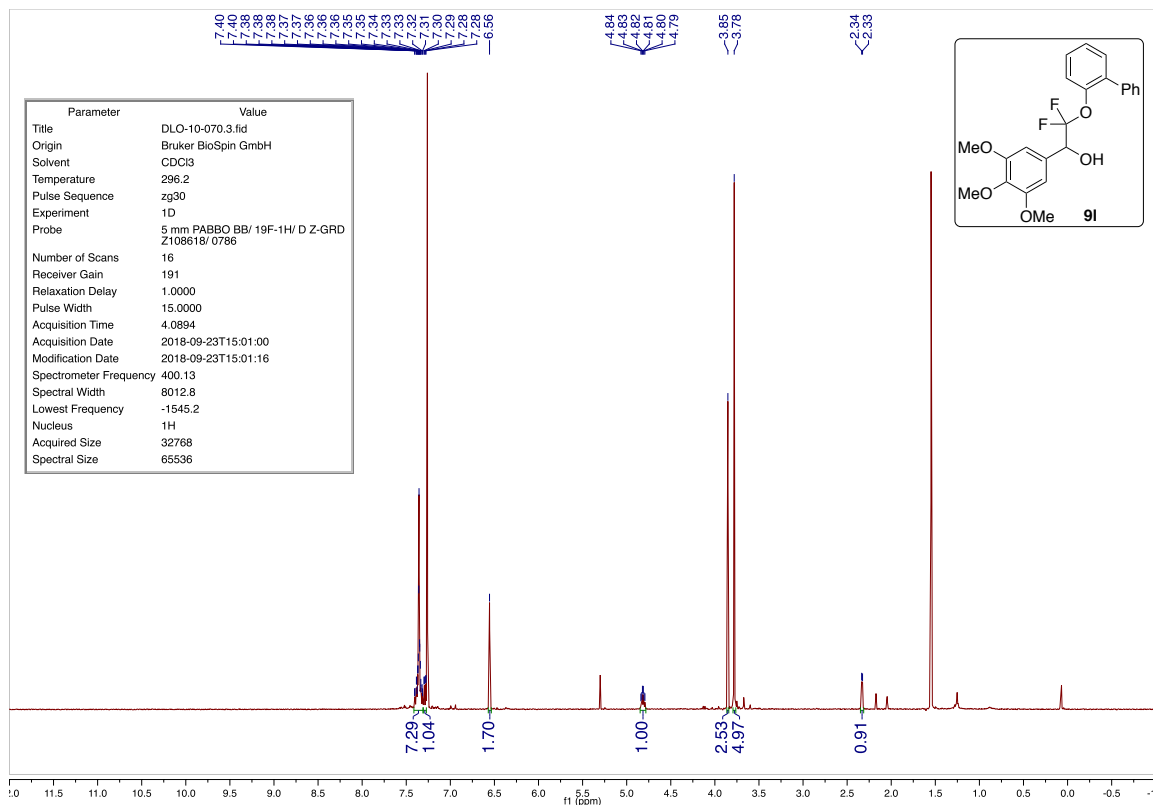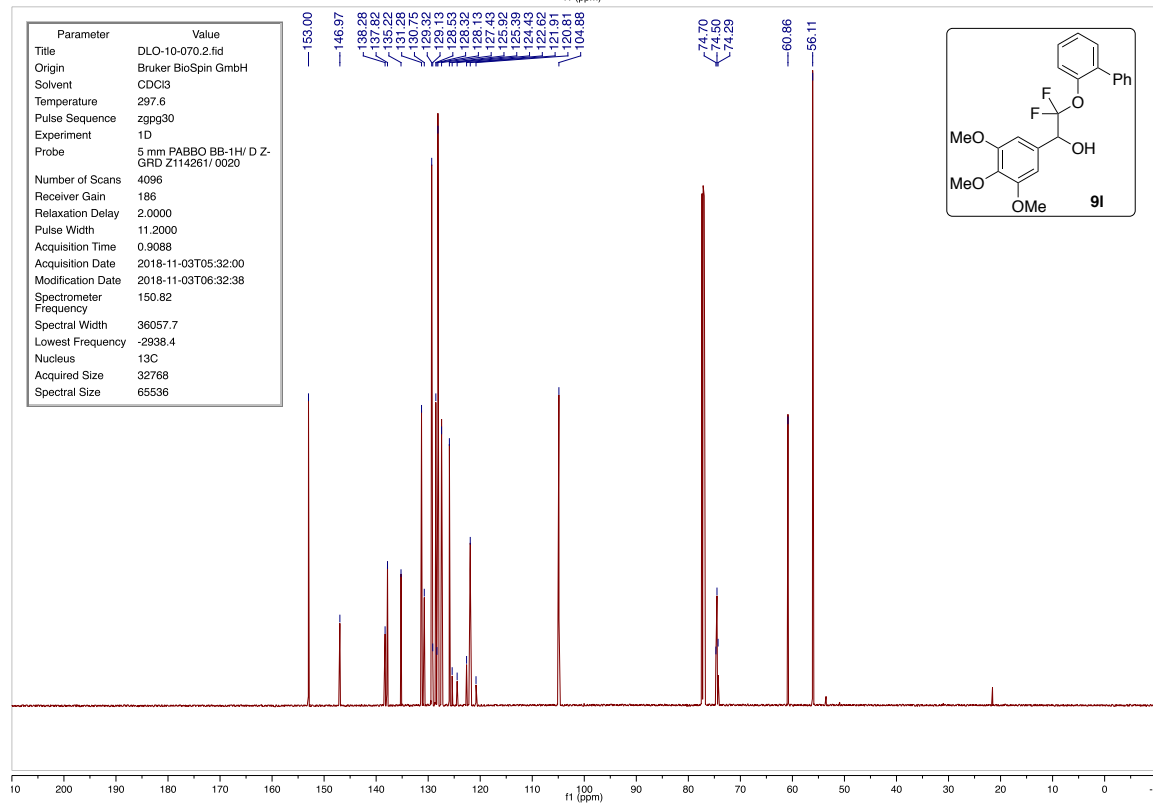

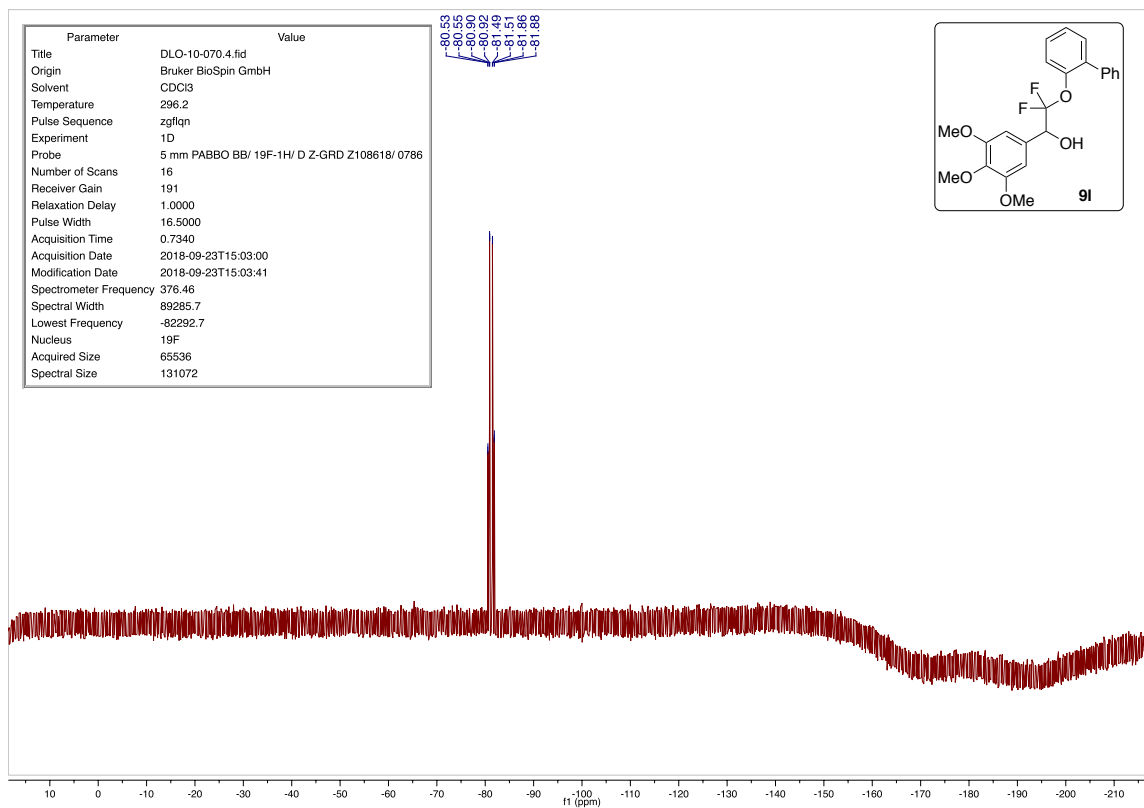

Supplement: NIHMS1614303-supplement-Supporting_Information.pdf [file NIHMS1614303-supplement-Supporting_Information.pdf]
